# Supplementary material for: Bone histology of acipenseriform fishes reveals seasonality during the final years of the Mesozoic.
Source: Research Square preprint supplement (doi:10.21203/rs.3.rs-646564/v1), 2021-07-12

## Supplementary information

|                                                                                                                                                                                              |    |
|----------------------------------------------------------------------------------------------------------------------------------------------------------------------------------------------|----|
| 1. Osteohistological thin sections                                                                                                                                                           | 2  |
| 1.1 Thin section X-2724 at multiple resolutions                                                                                                                                              | 2  |
| 1.2 Thin section MDX-3 at multiple resolutions                                                                                                                                               | 5  |
| 1.3 Thin section X-2733a at multiple resolutions                                                                                                                                             | 8  |
| 1.4 Thin section X-2733b at multiple resolutions                                                                                                                                             | 11 |
| 1.5 Thin section X-2743M at multiple resolutions                                                                                                                                             | 14 |
| 1.6 Thin section X-2744M at multiple resolutions                                                                                                                                             | 17 |
| 2. Micro X-ray fluorescence                                                                                                                                                                  | 20 |
| 2.1 Elemental spectrum for each specimen                                                                                                                                                     | 20 |
| 2.2 Elemental distribution map of Ca, P and Mn for each specimen                                                                                                                             | 25 |
| 2.3 Elemental distribution map of K, Si and Fe for each specimen                                                                                                                             | 30 |
| 2.4 Heat maps of Ca for each specimen                                                                                                                                                        | 35 |
| 2.5 Heat maps of P for each specimen                                                                                                                                                         | 40 |
| 3. Propagation-based phase contrast synchrotron radiation micro computed tomography                                                                                                          | 45 |
| 3.1 Thick slab (virtual thin sections) of X-2724, MDX-3, X-2743M and X-2744M                                                                                                                 | 45 |
| 3.2 Thick slab (virtual thin sections) of FAU.DGS.ND.161.4559.T with the impact spherules in the gill rakers                                                                                 | 49 |
| 3.3 Thick slabs (virtual thin sections) of the membranous non-mineralized sidewalls of the cranial cavity of FAU.DGS.ND.161.4559.T with locations indicated on the 3D model of the specimen. | 51 |
| V. Supplementary video                                                                                                                                                                       |    |
| V1. 3D reconstruction of Paddlefish FAU.DGS.ND.161.4559.T and the impact spherules in the gill rakers                                                                                        |    |

## 1. Osteohistological thin sections

### 1.1 Thin sections of X-2724 at multiple resolutions

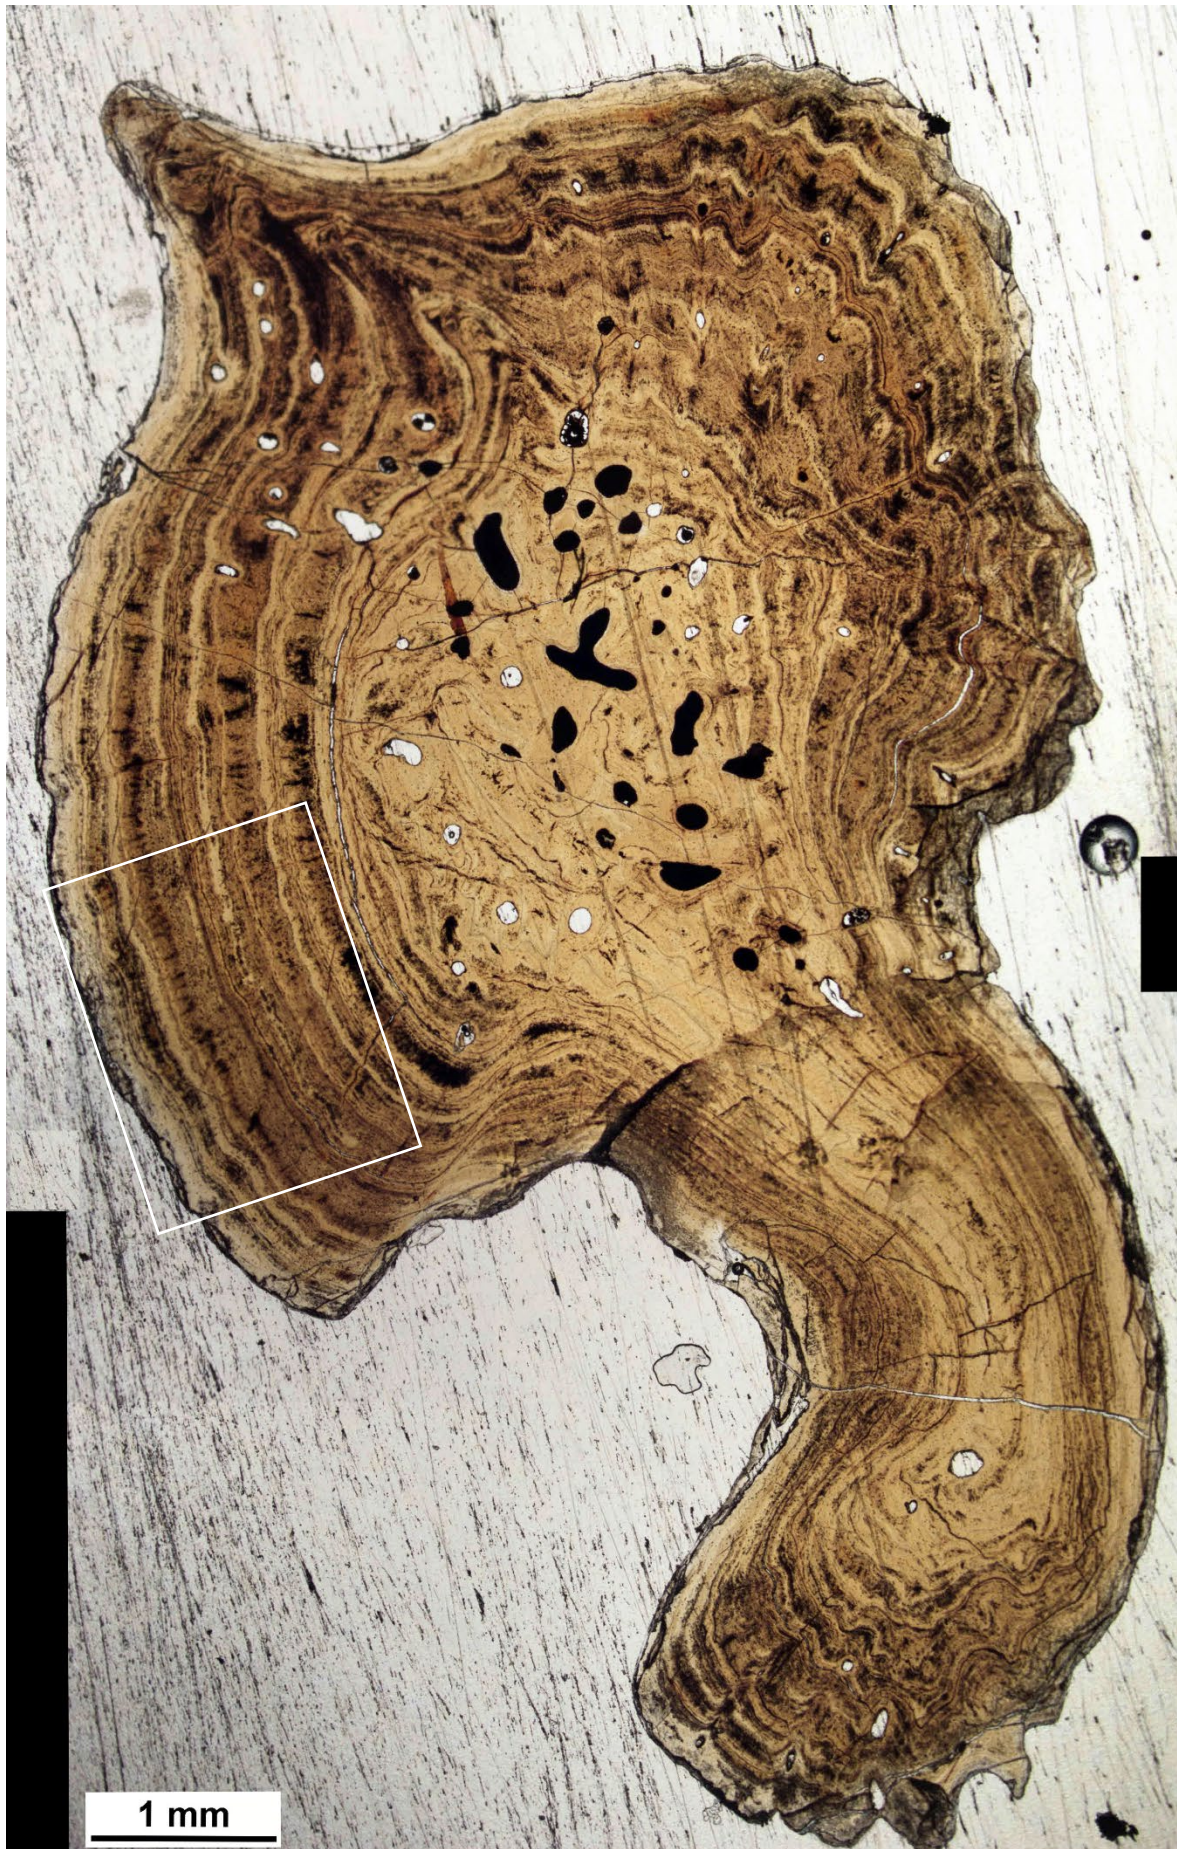

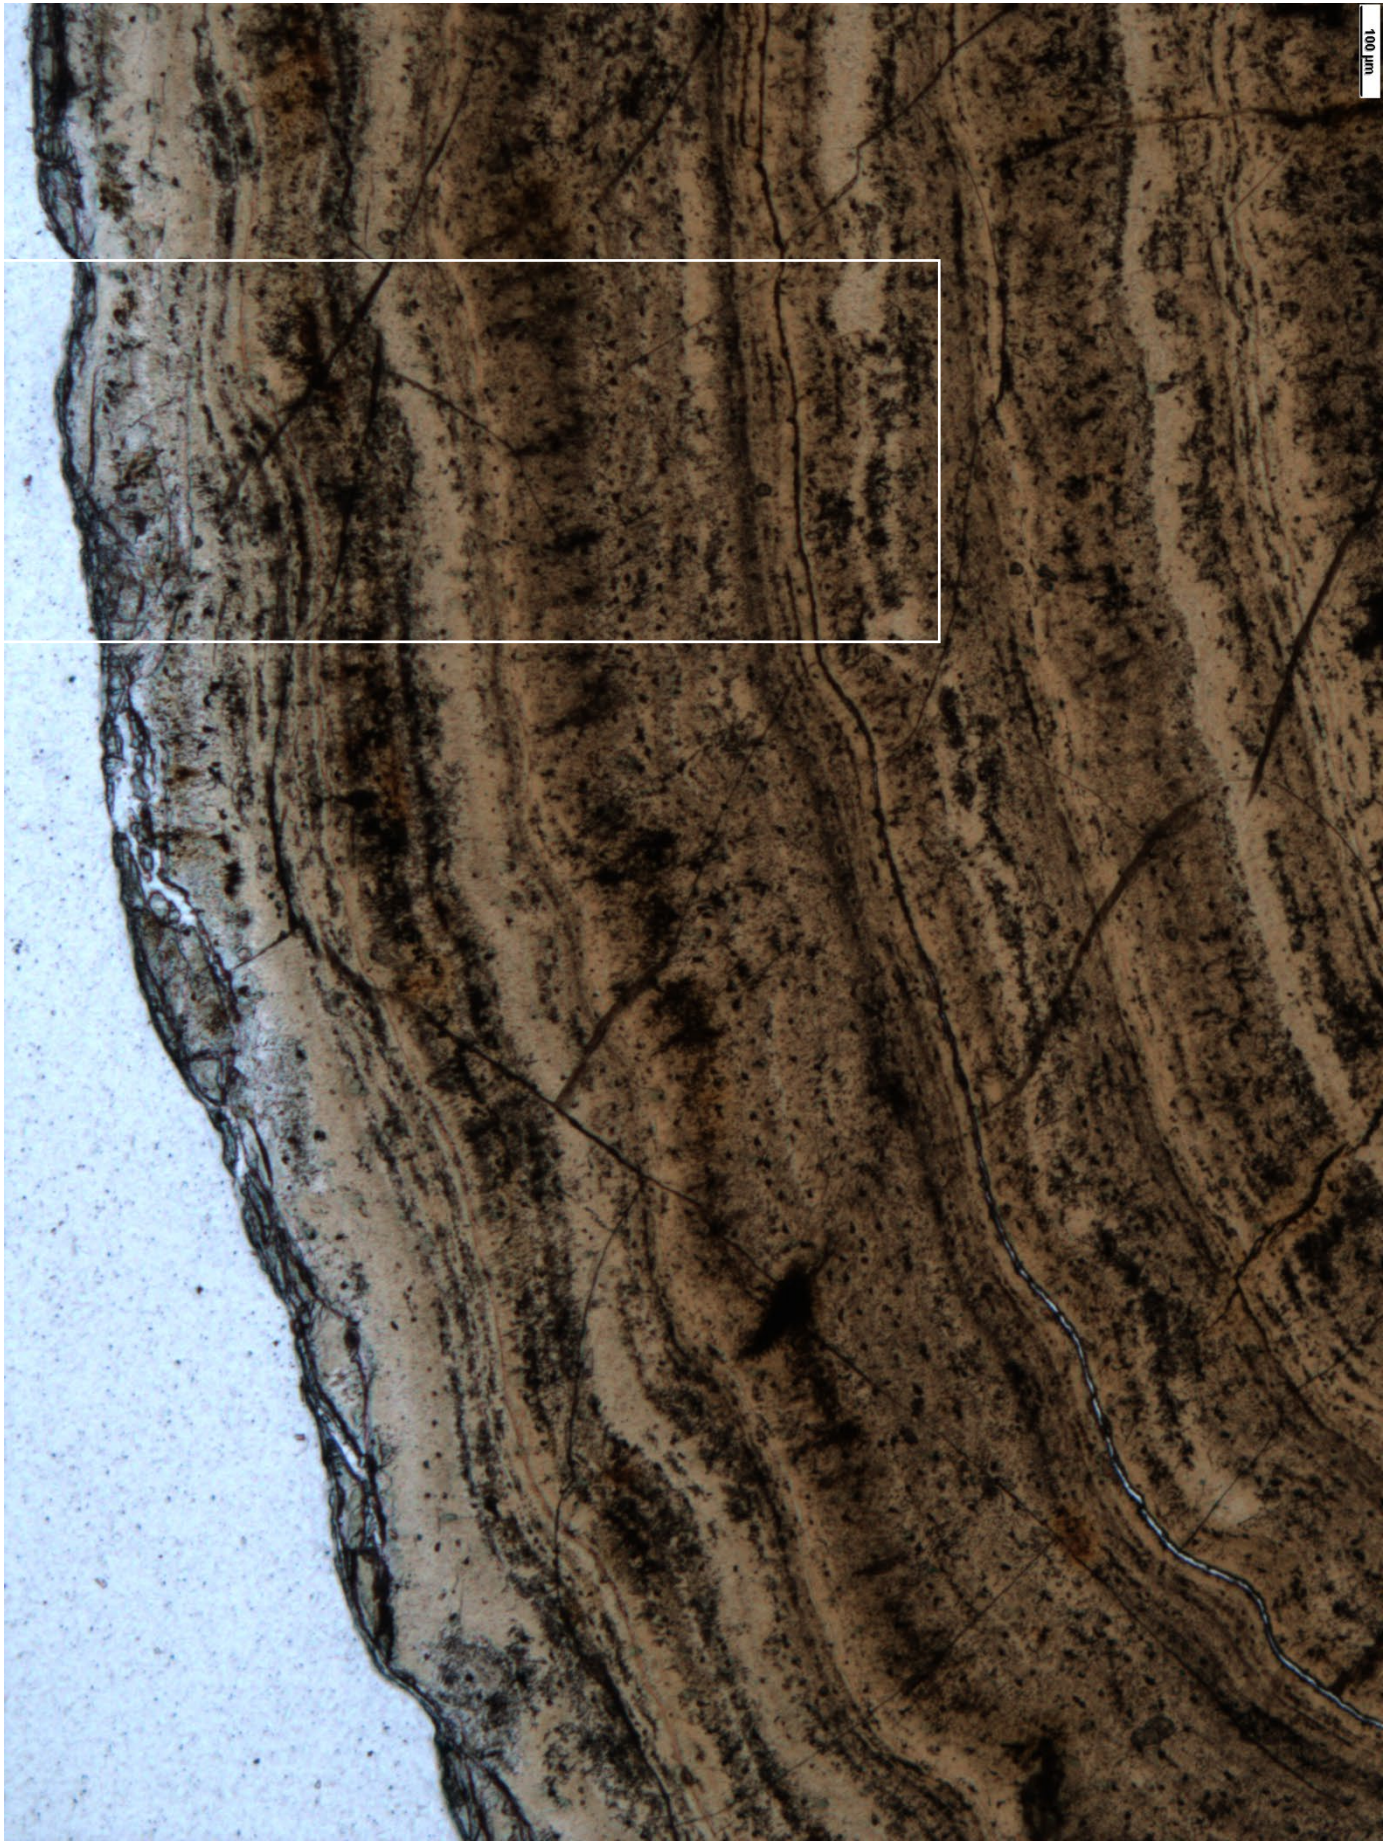

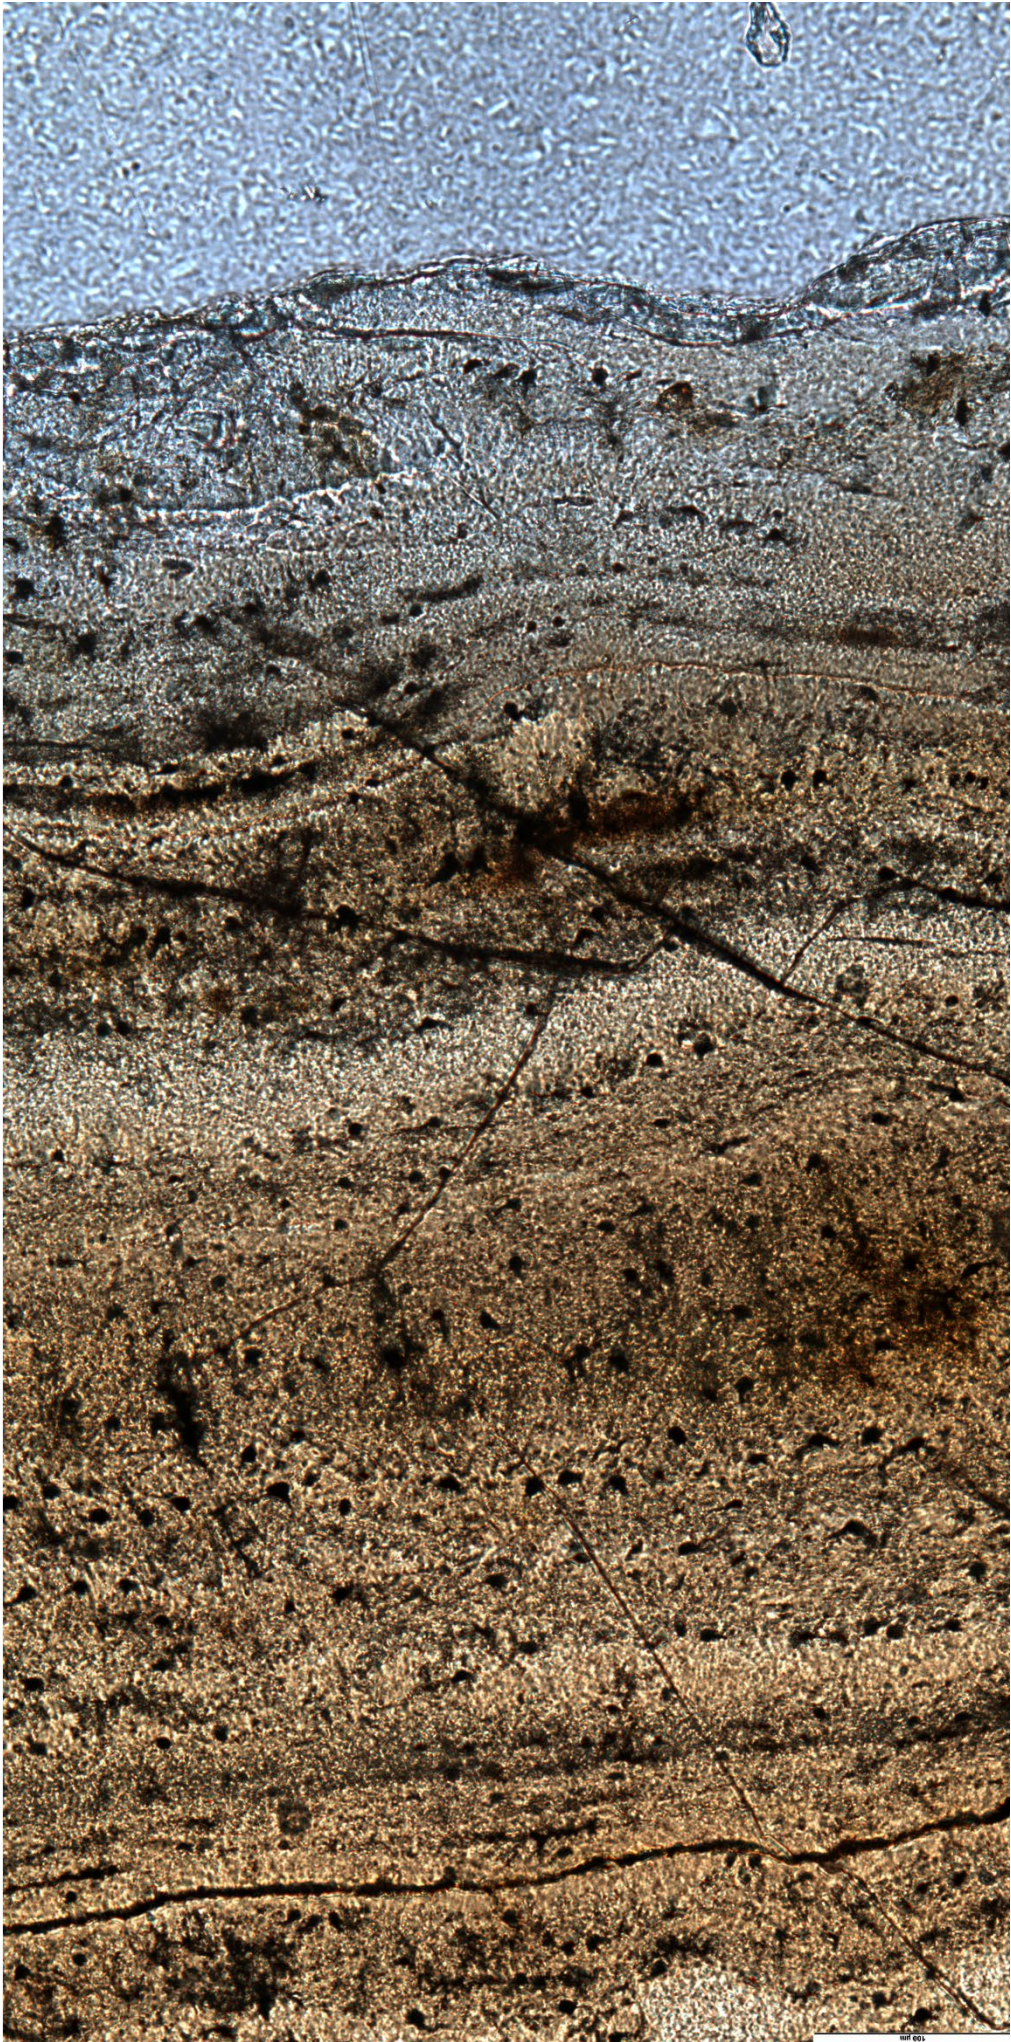

## 1.2 Thin section MDX-3 at multiple resolutions

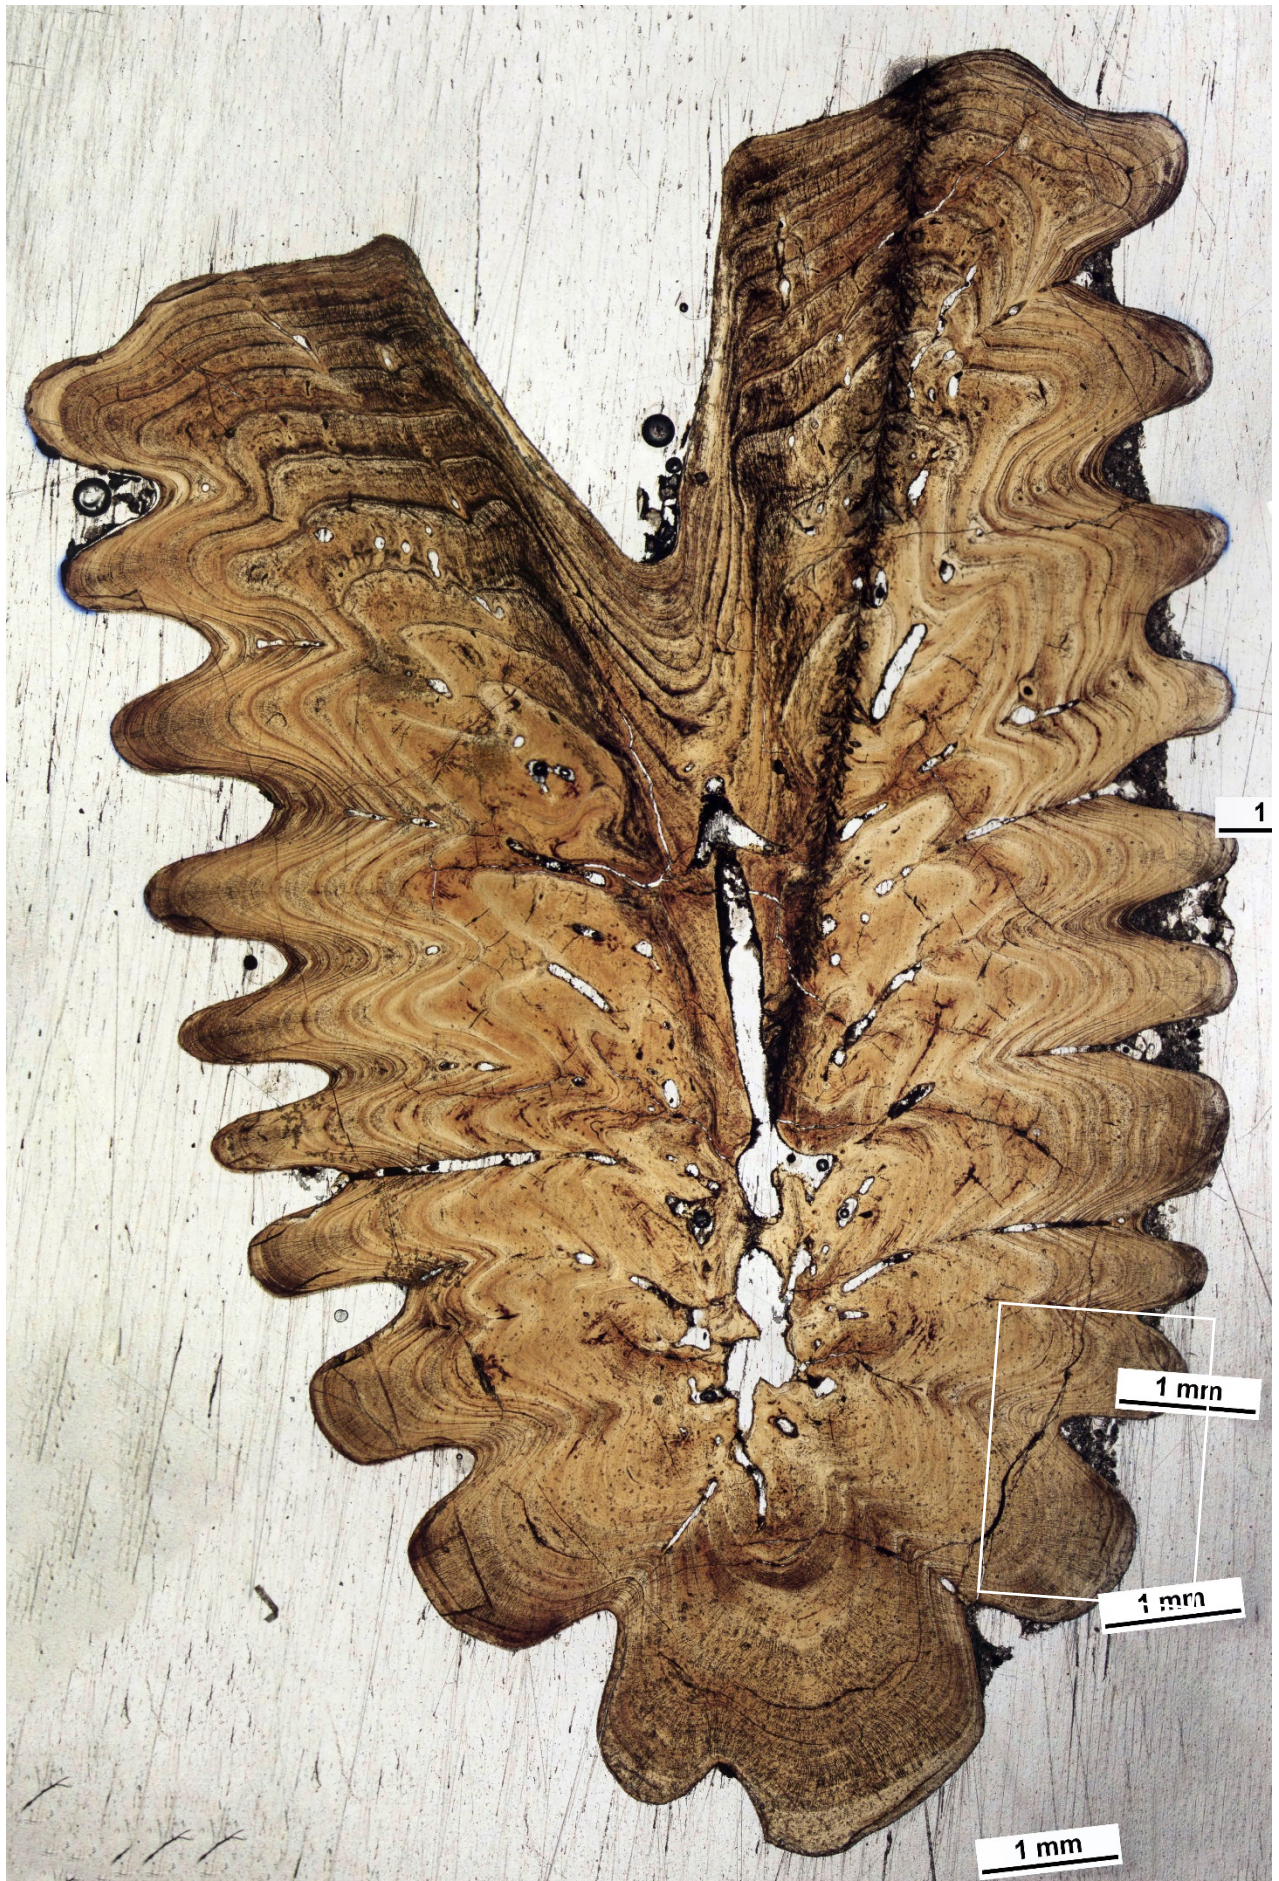

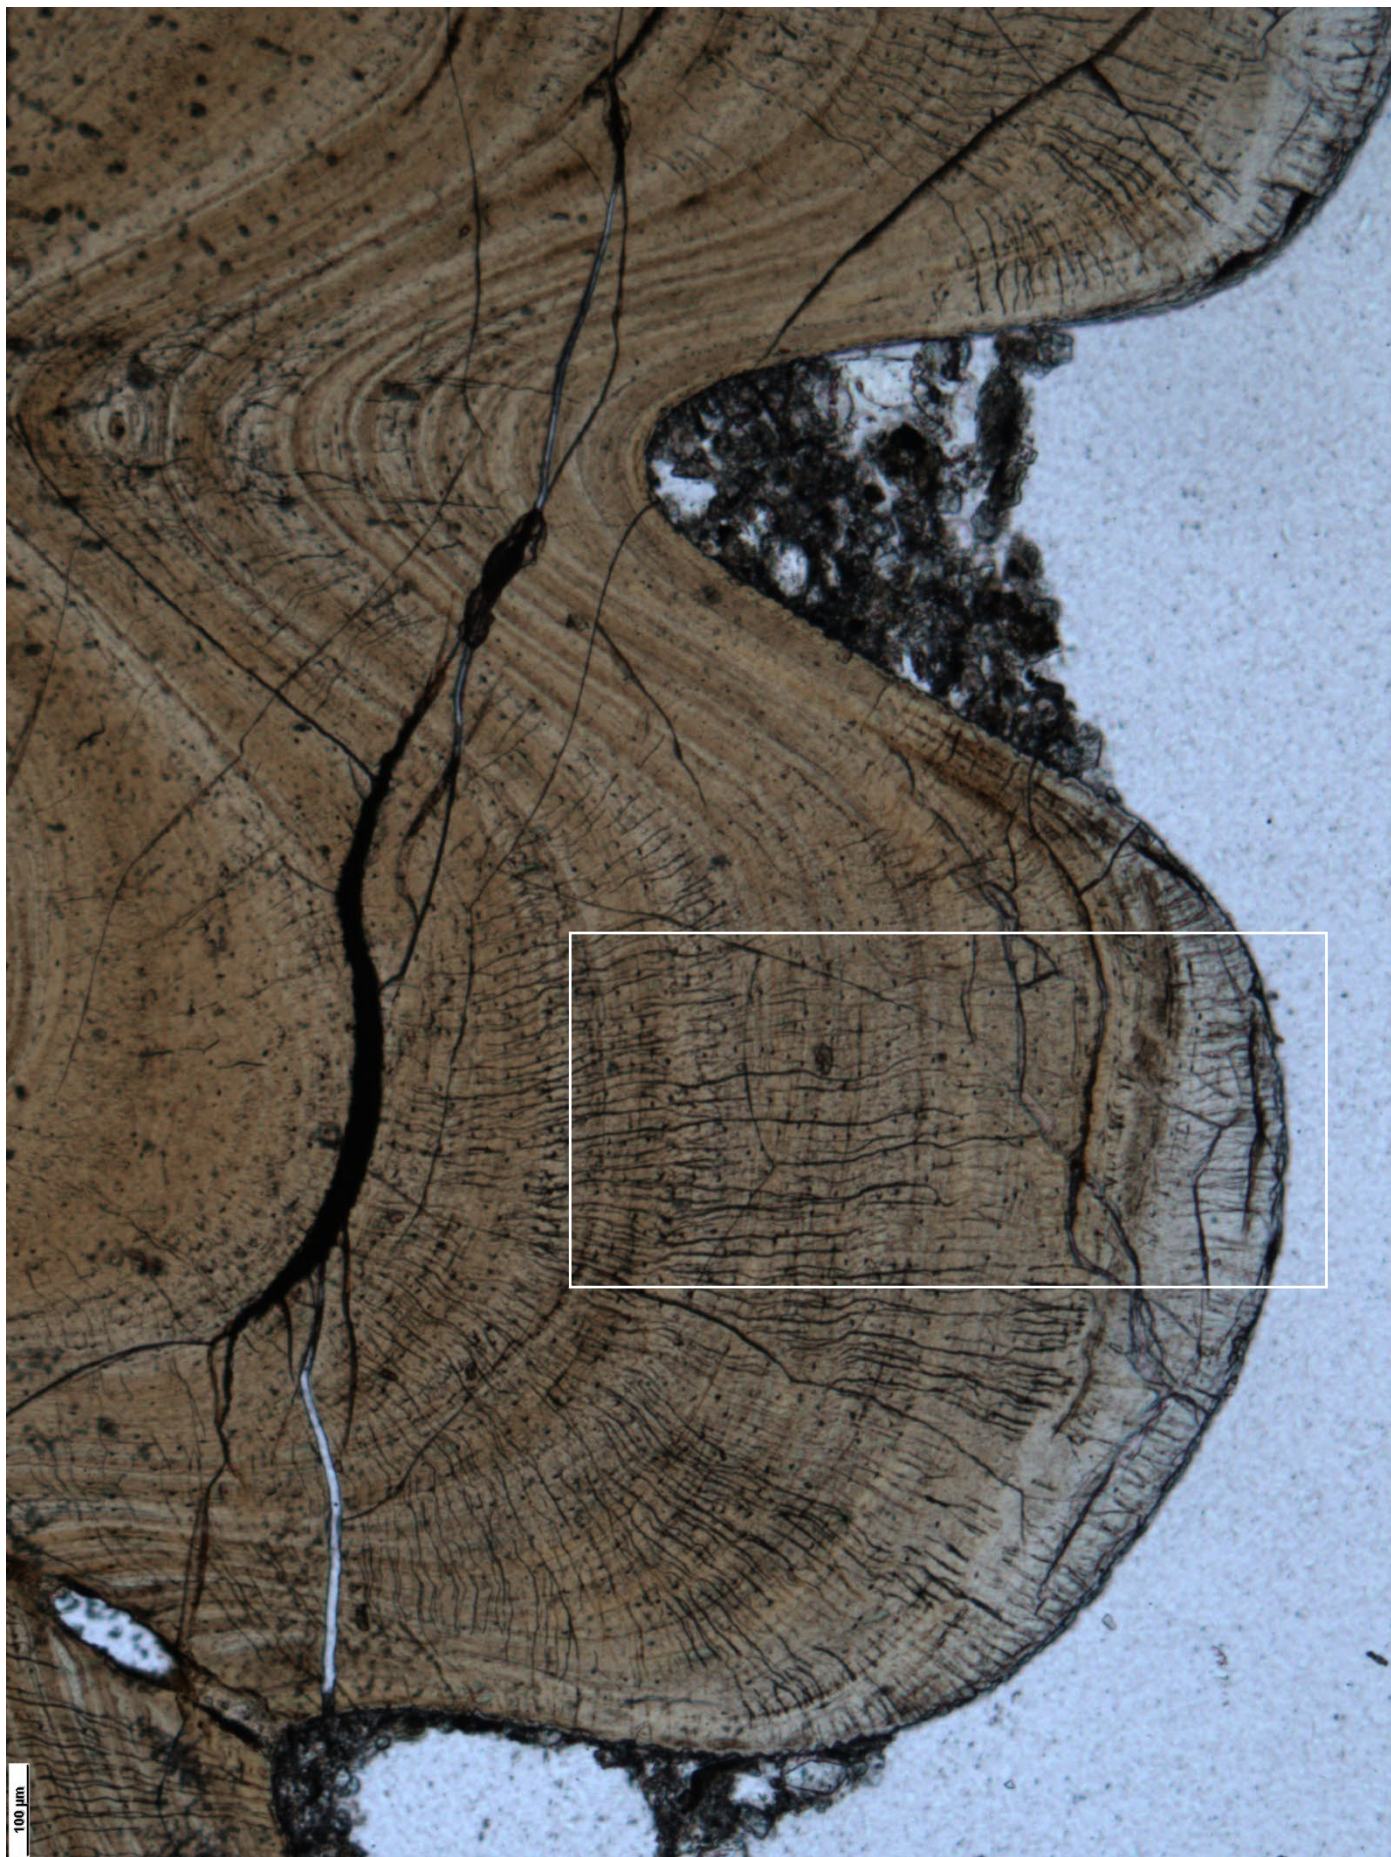

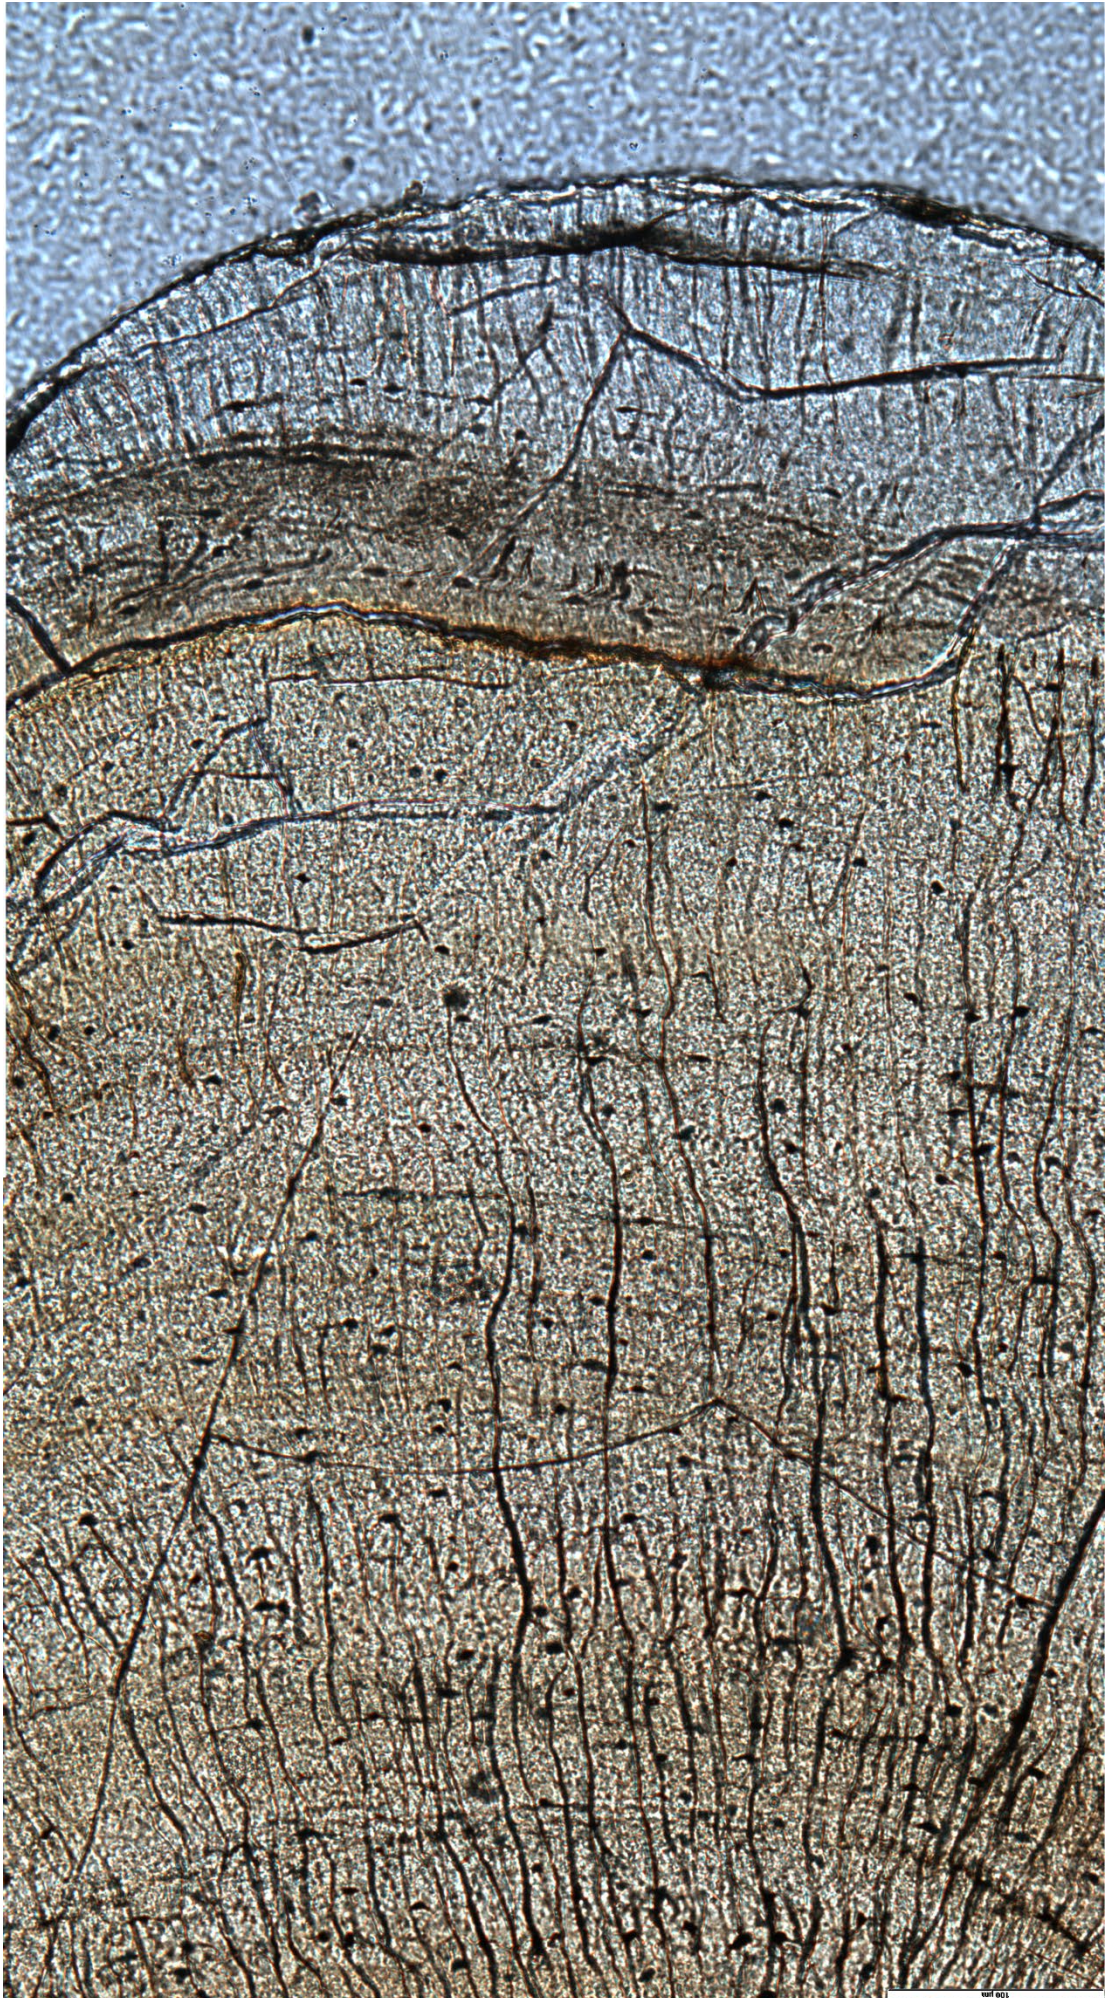

1.3 Thin section X-2733a at multiple resolutions

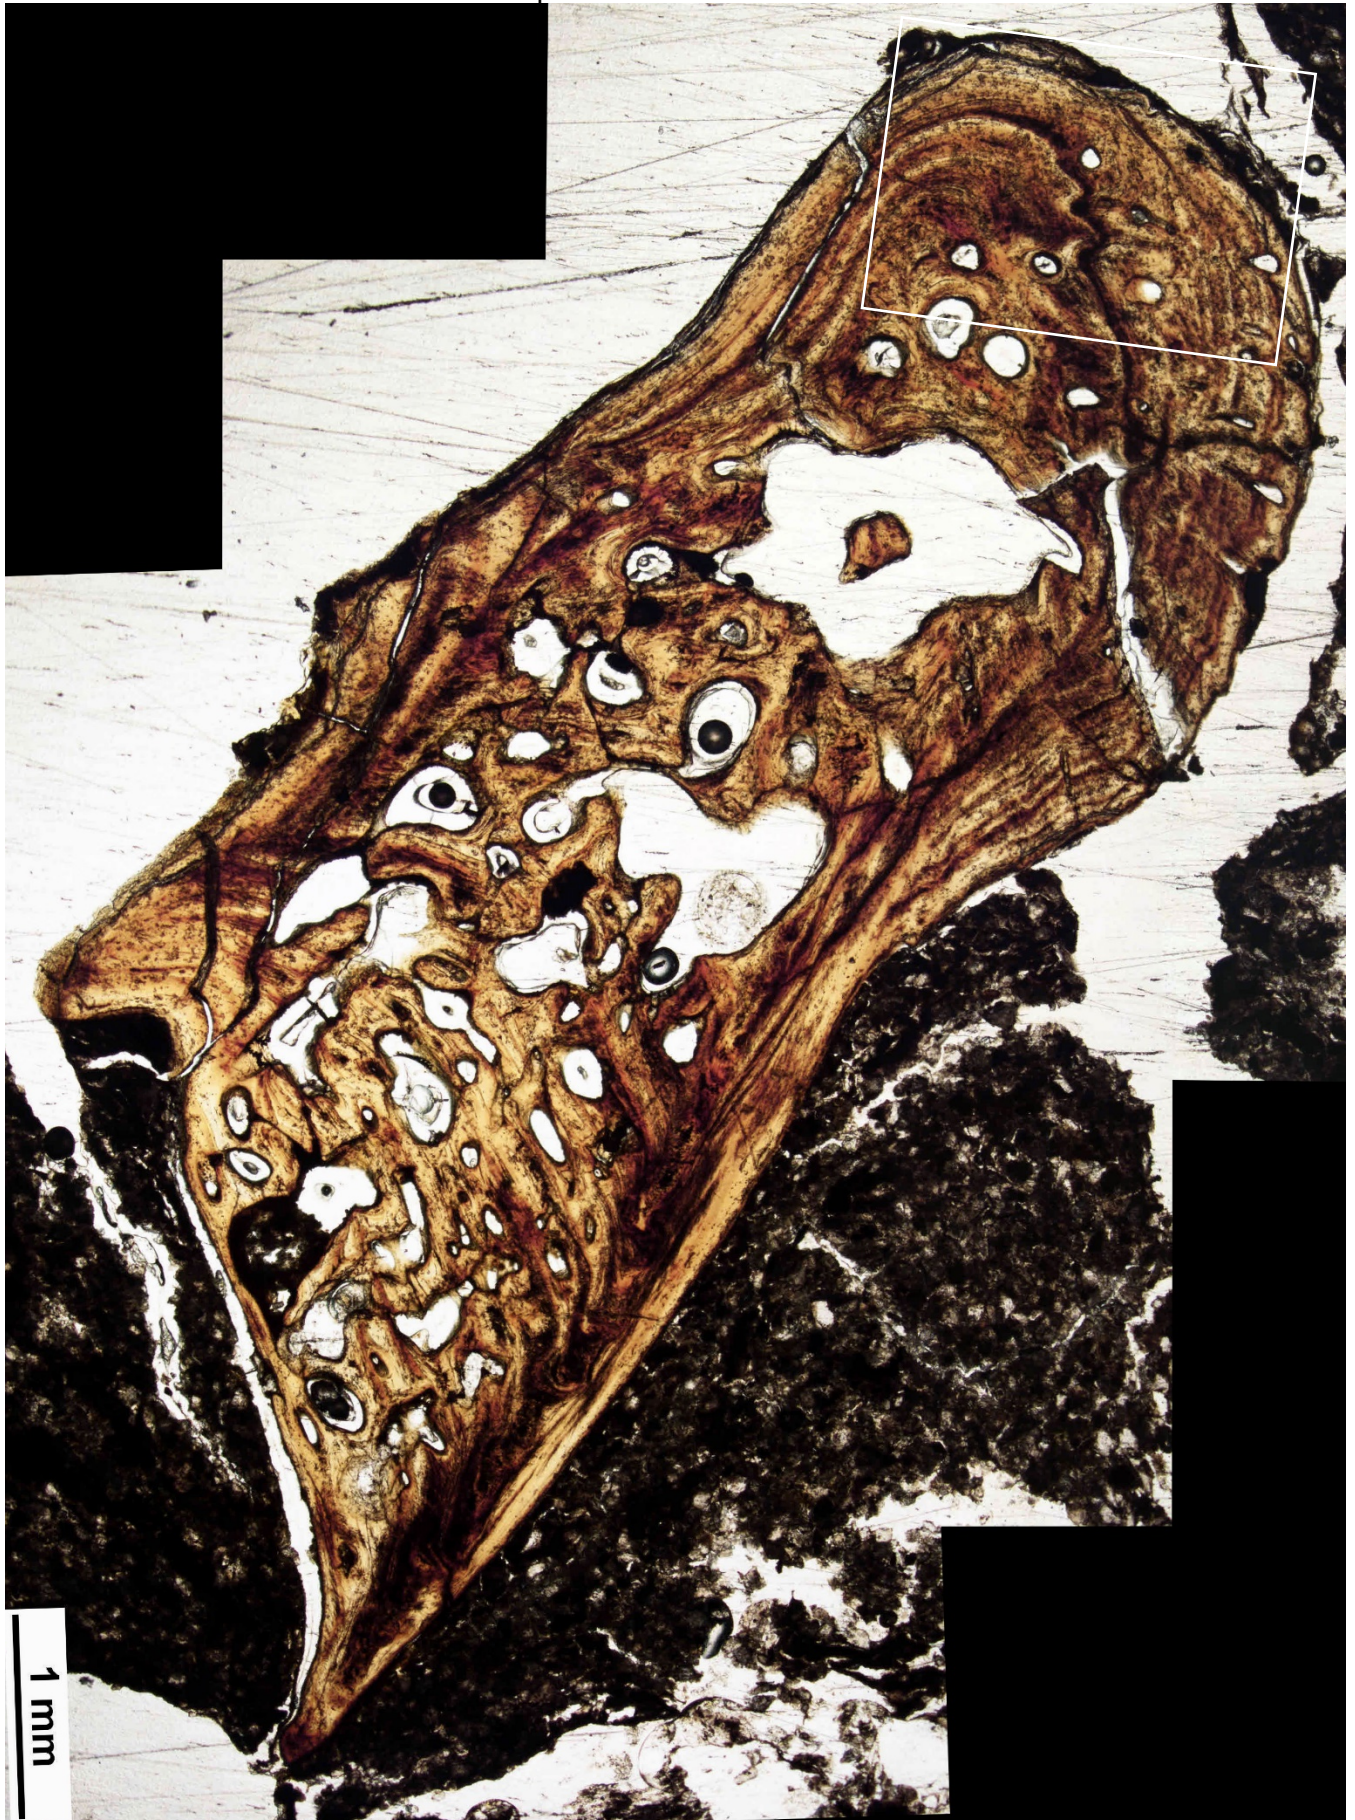

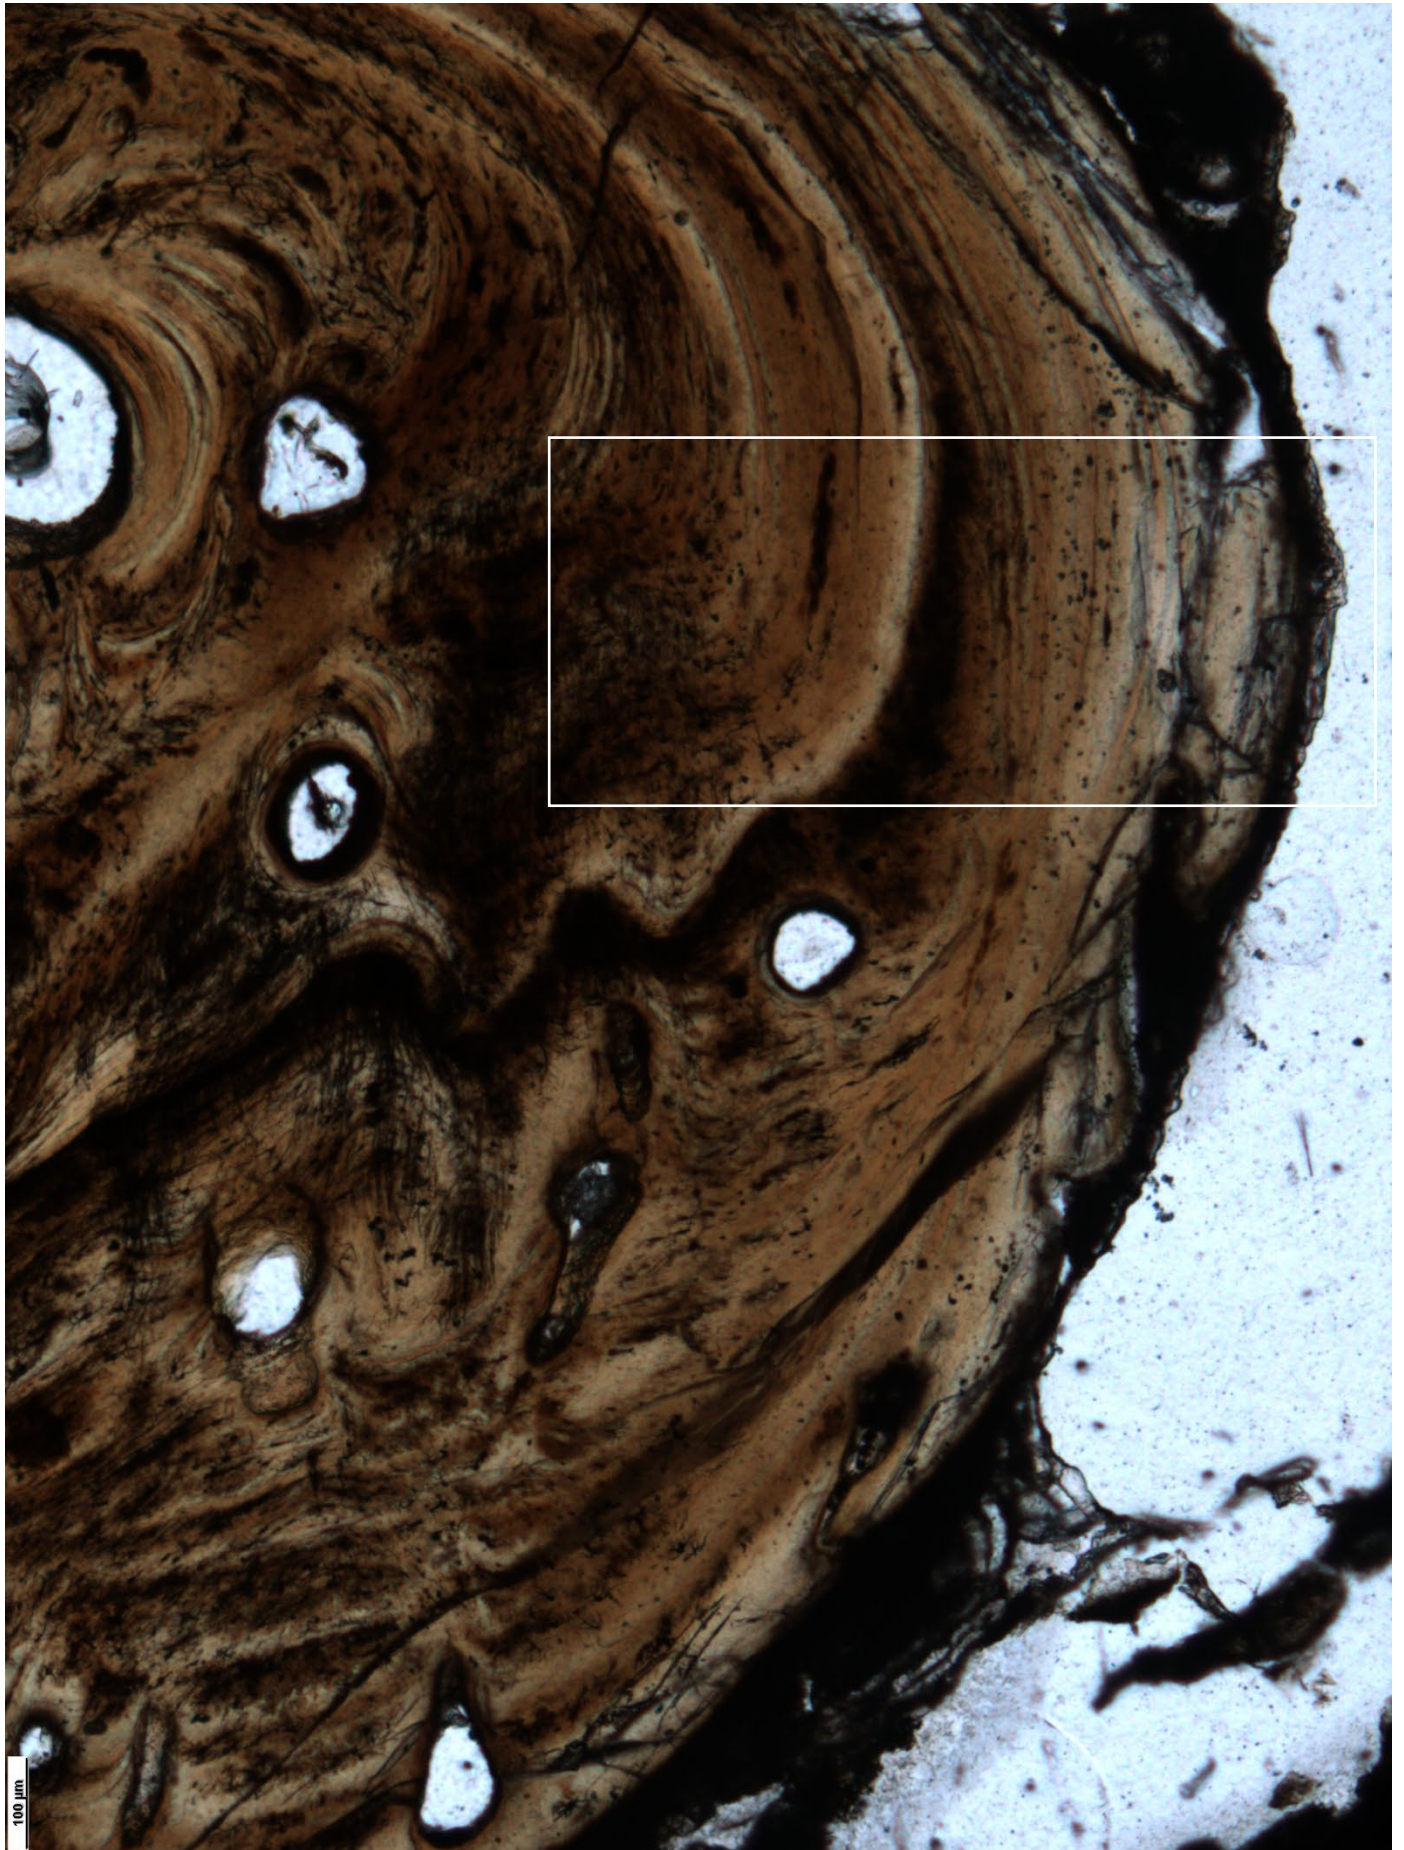

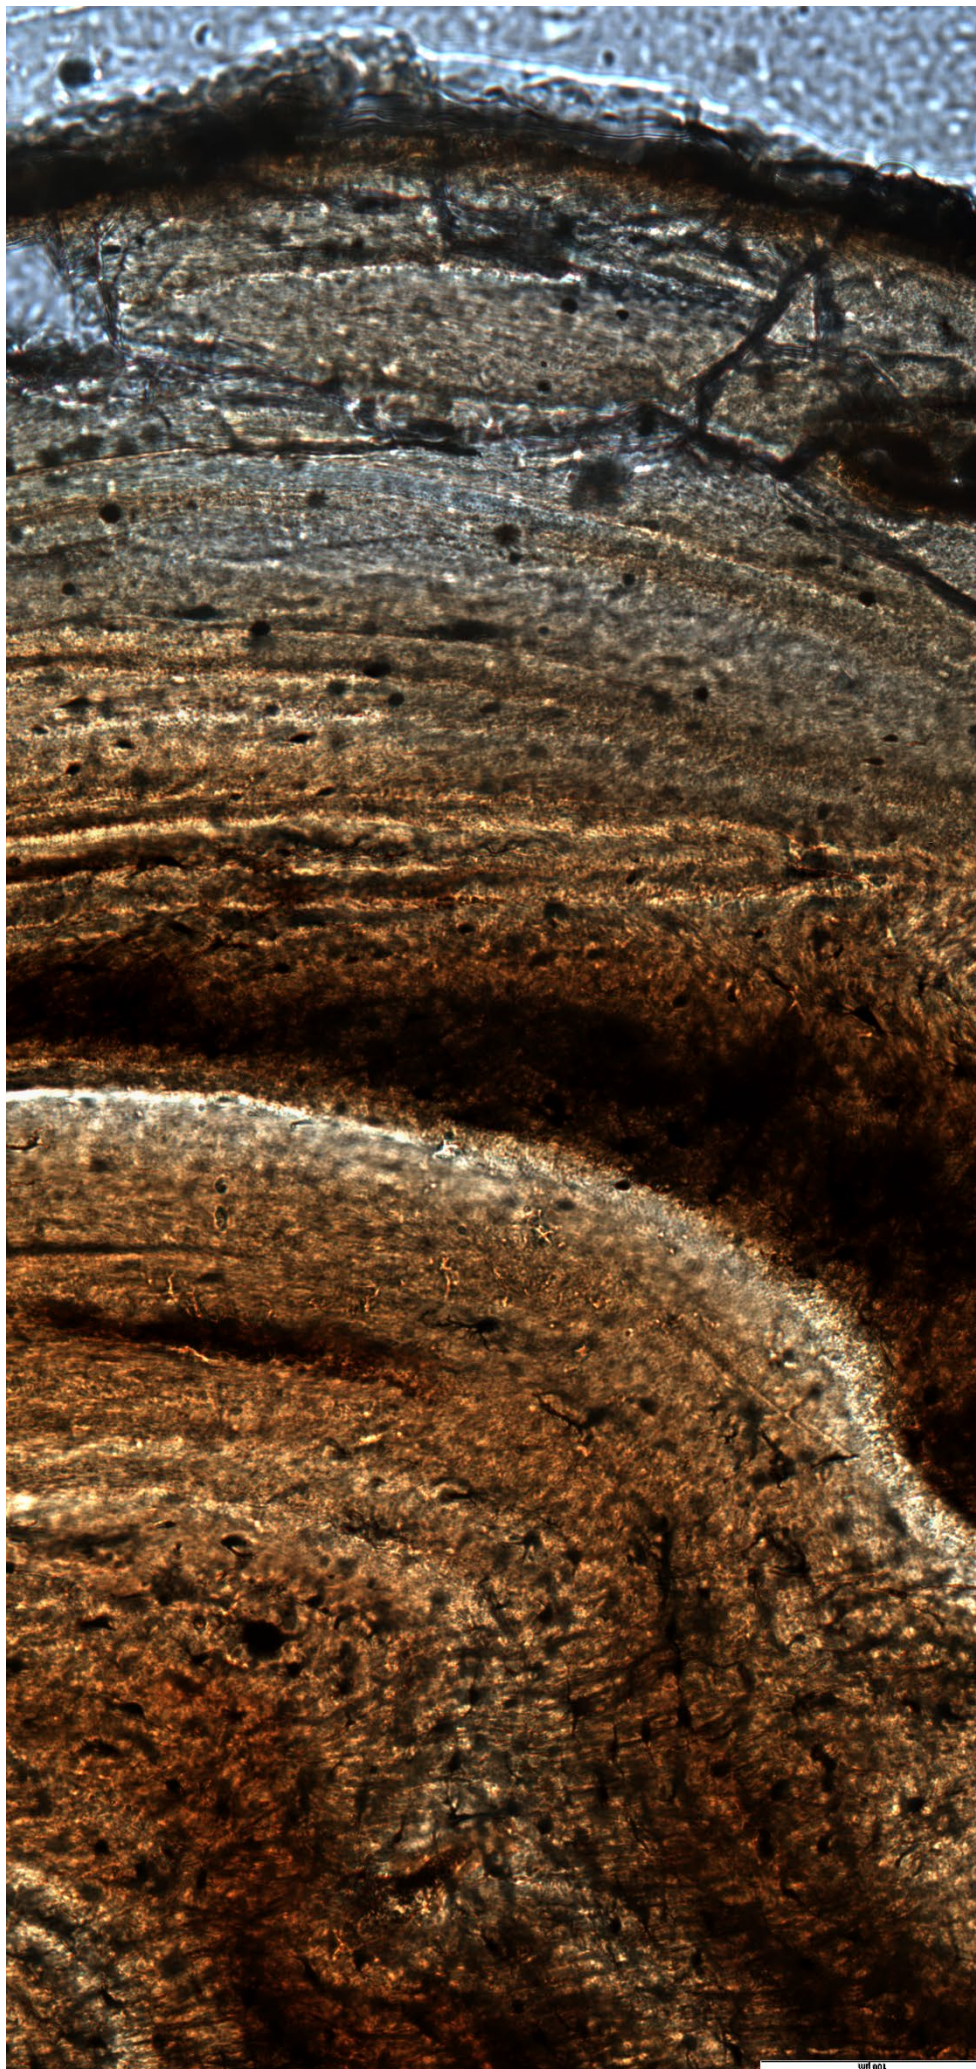

#### 1.4 Thin section X-2733b at multiple resolutions

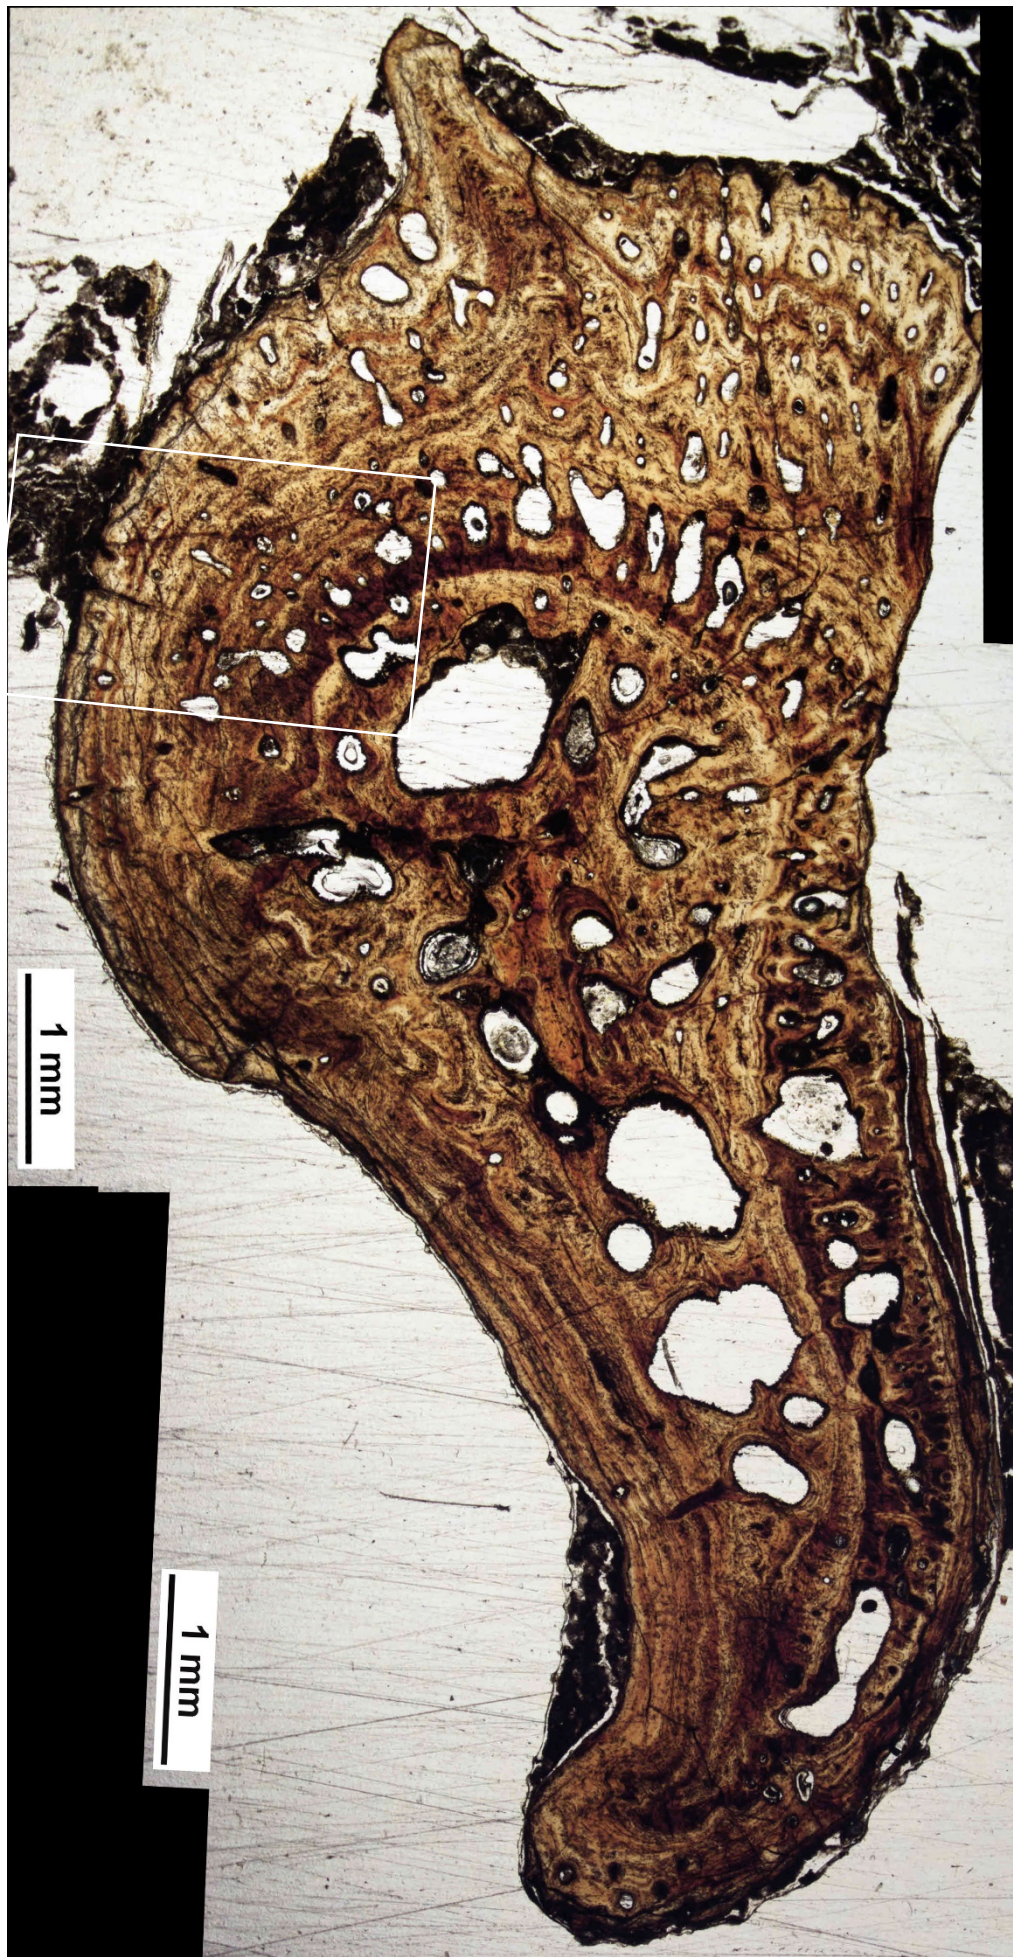

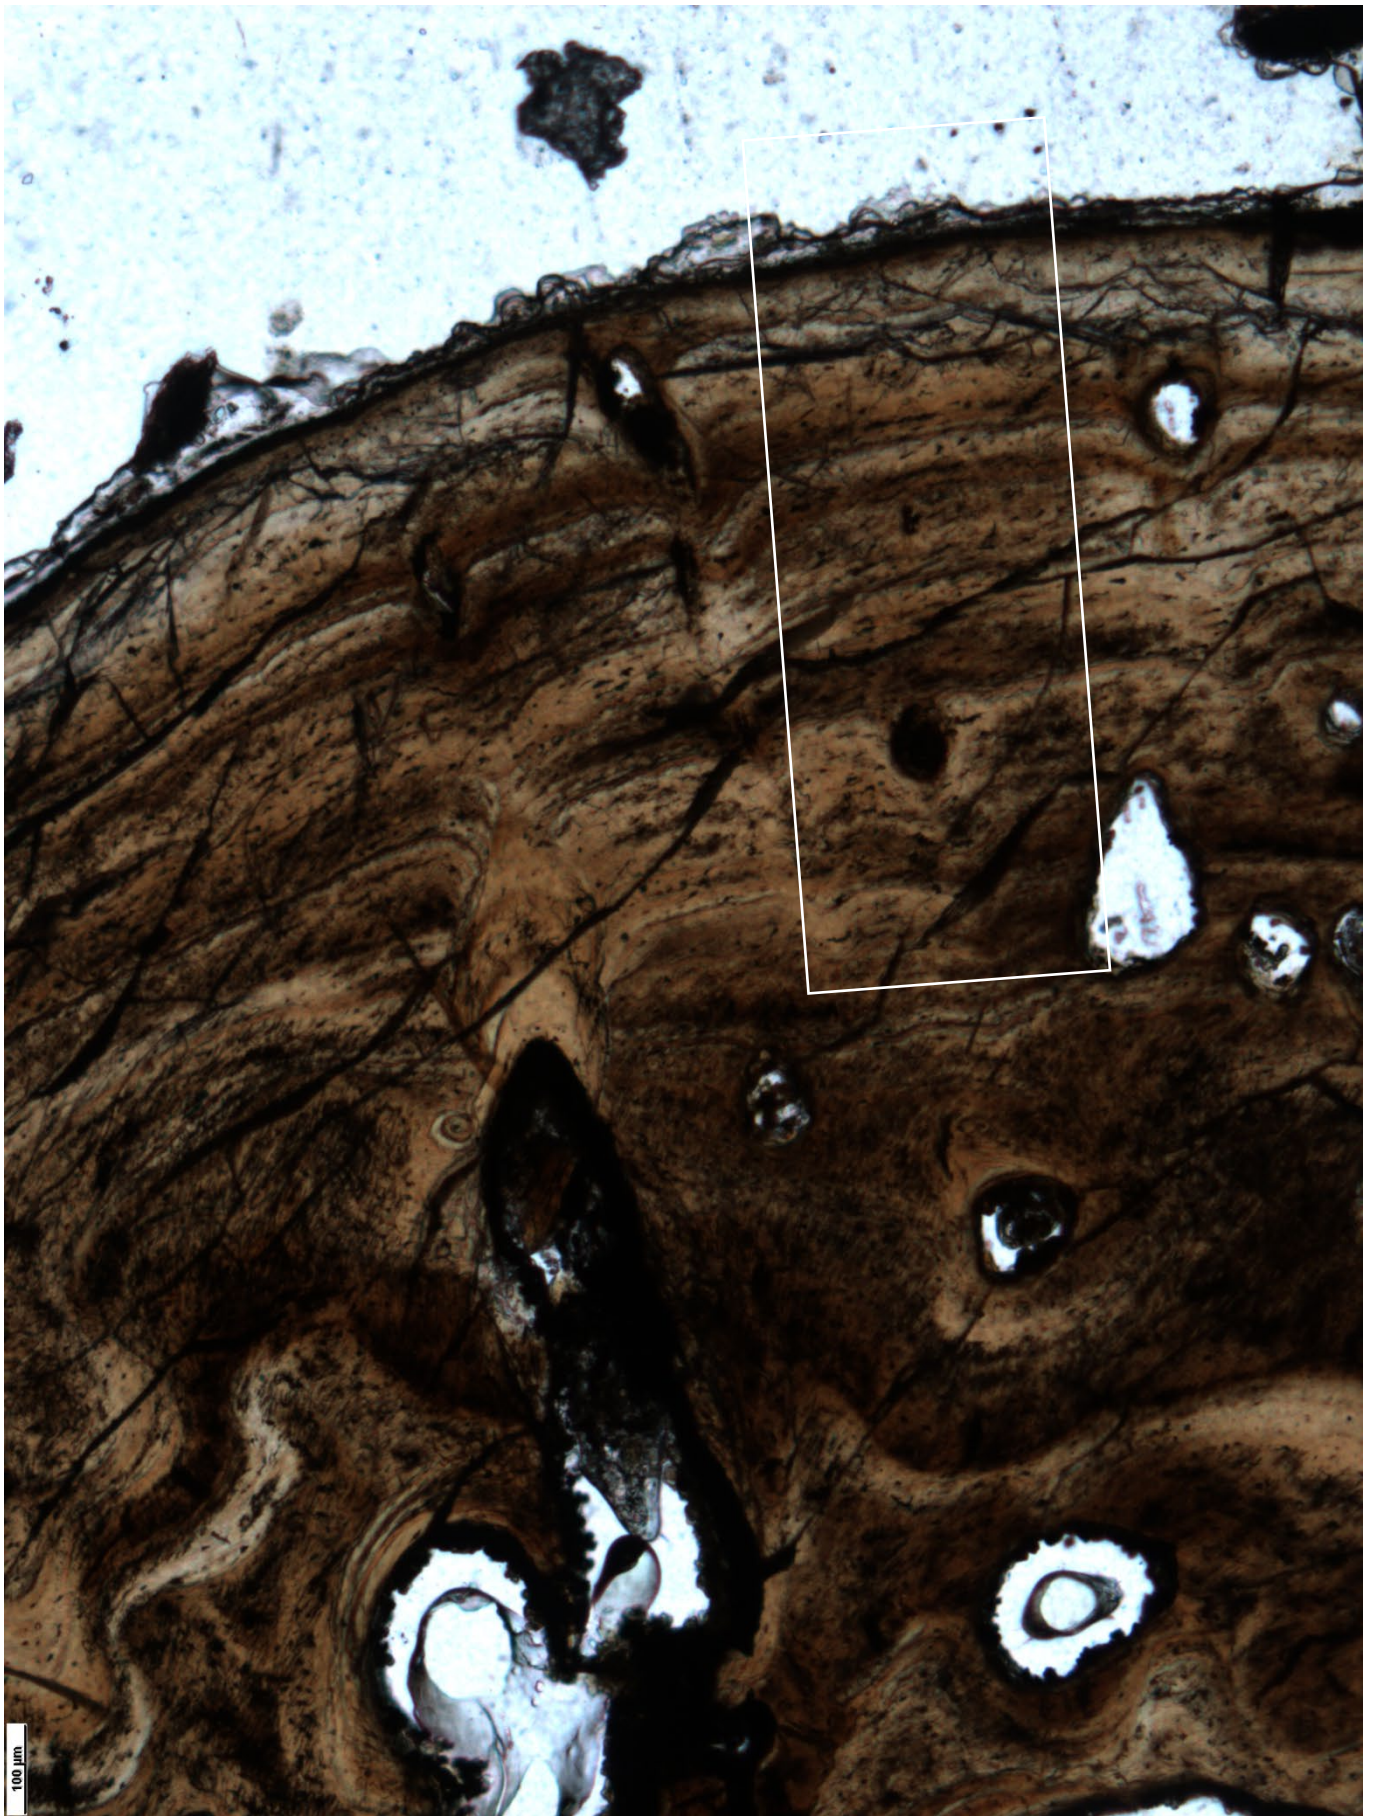

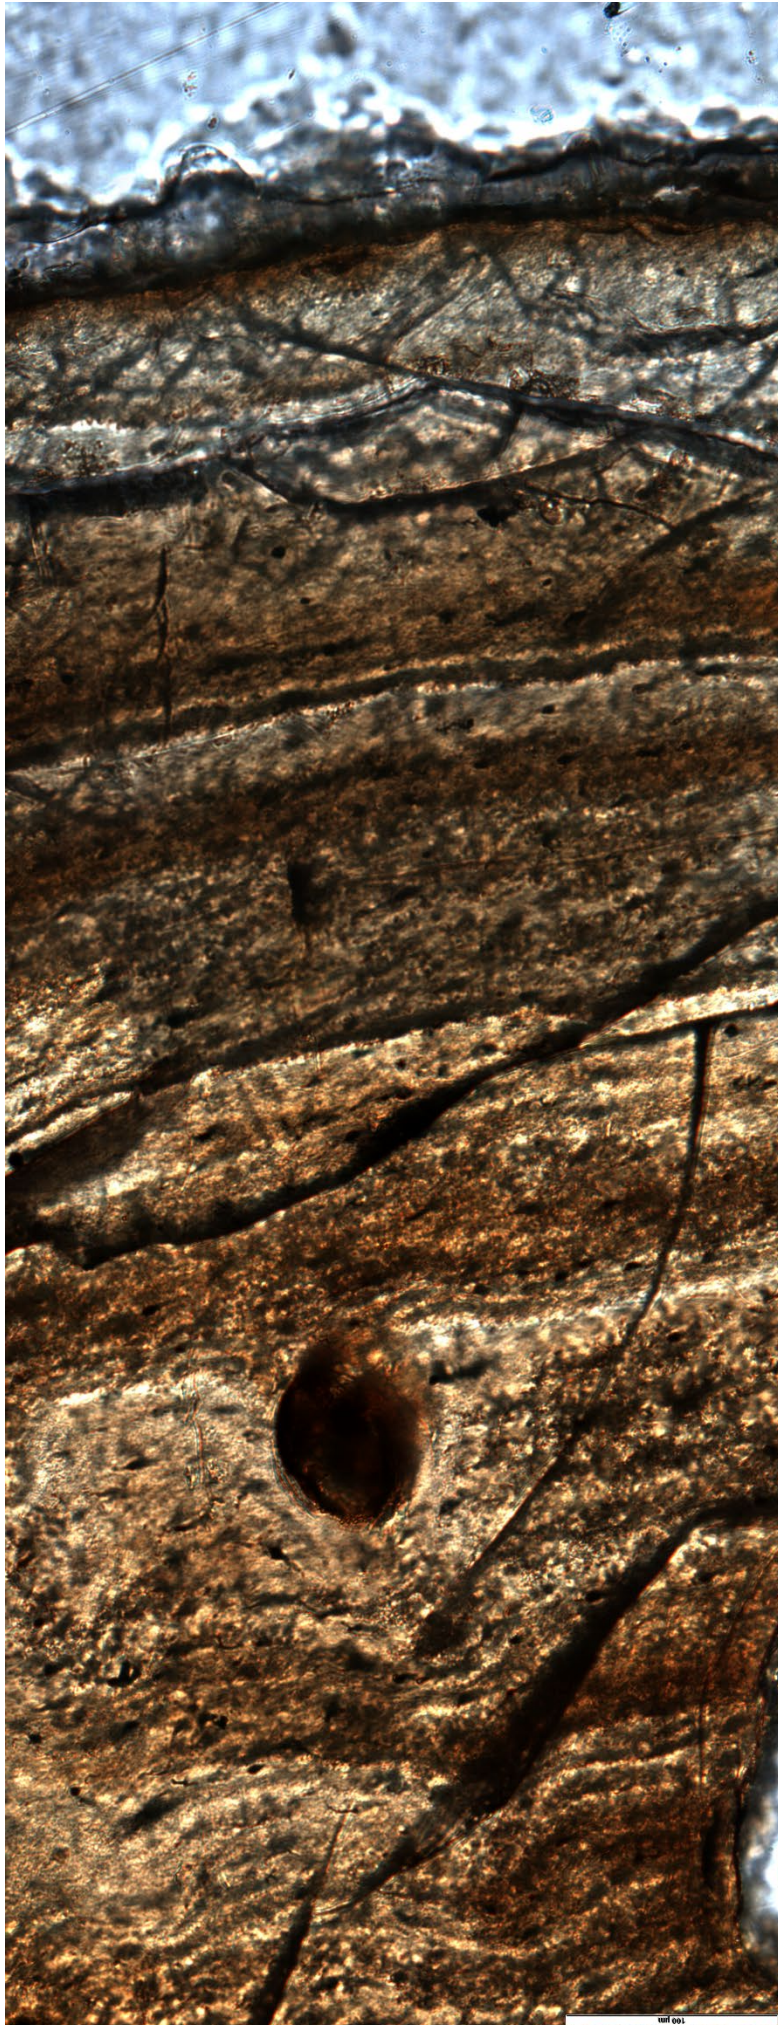

1.5 Thin section X-2743M at multiple resolutions

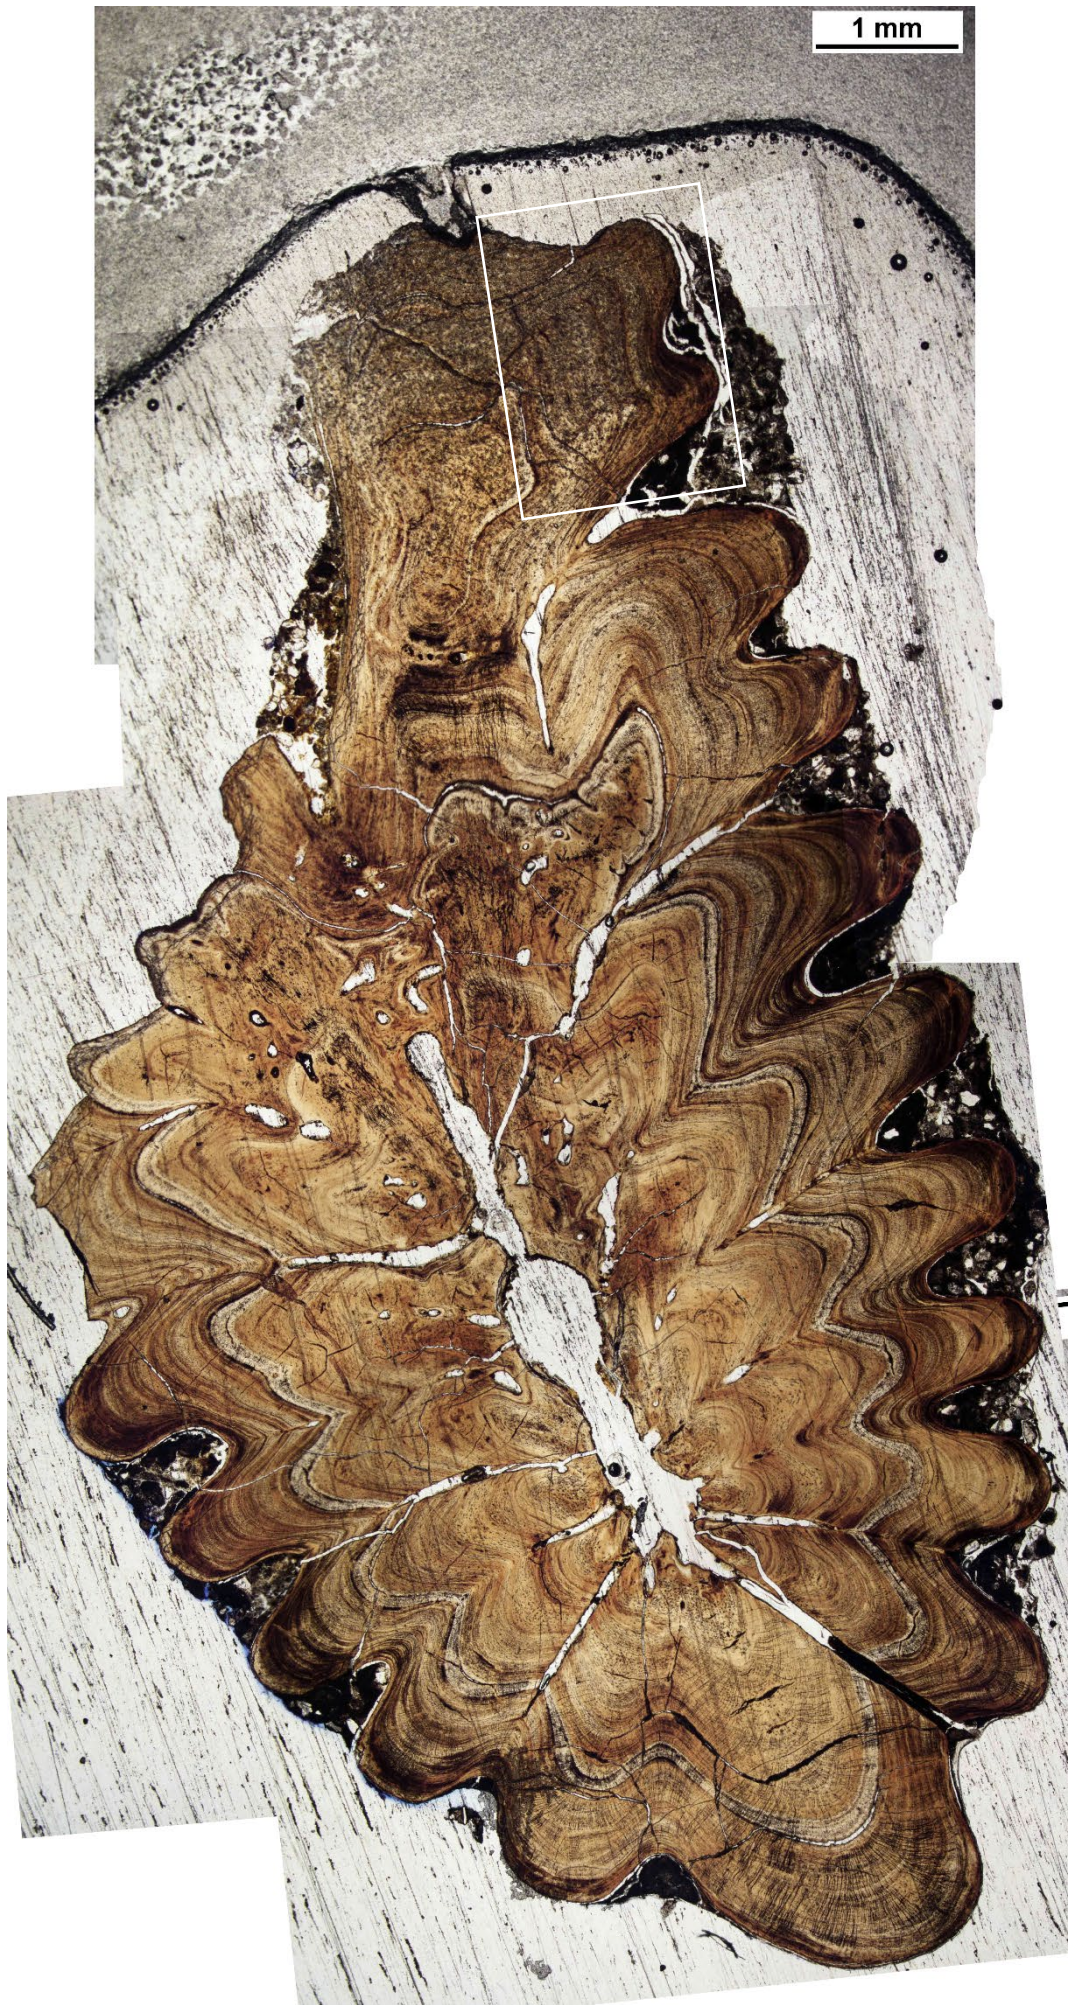

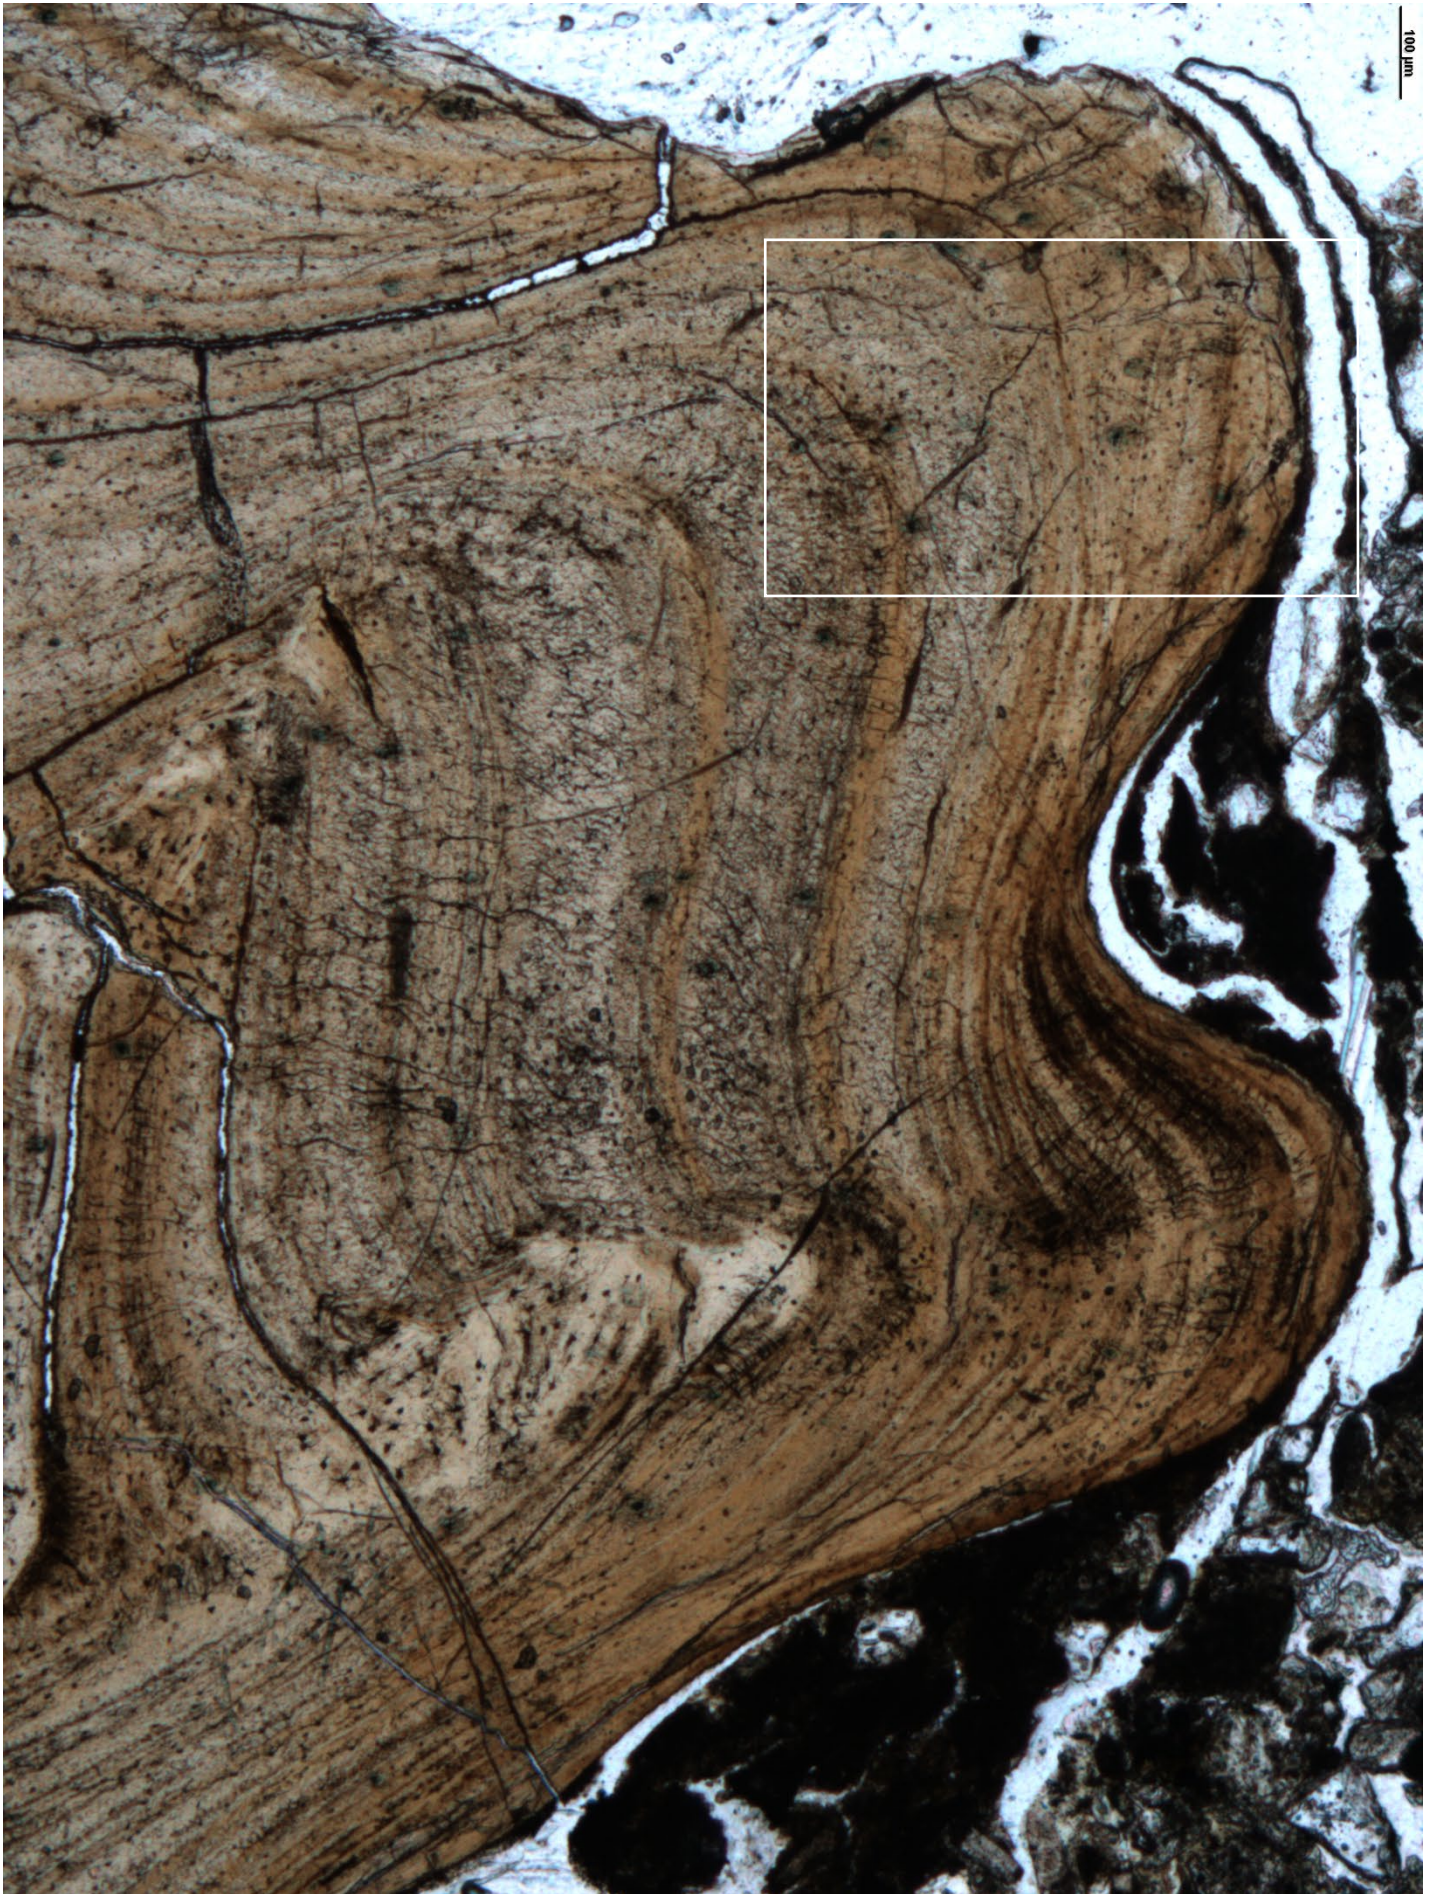

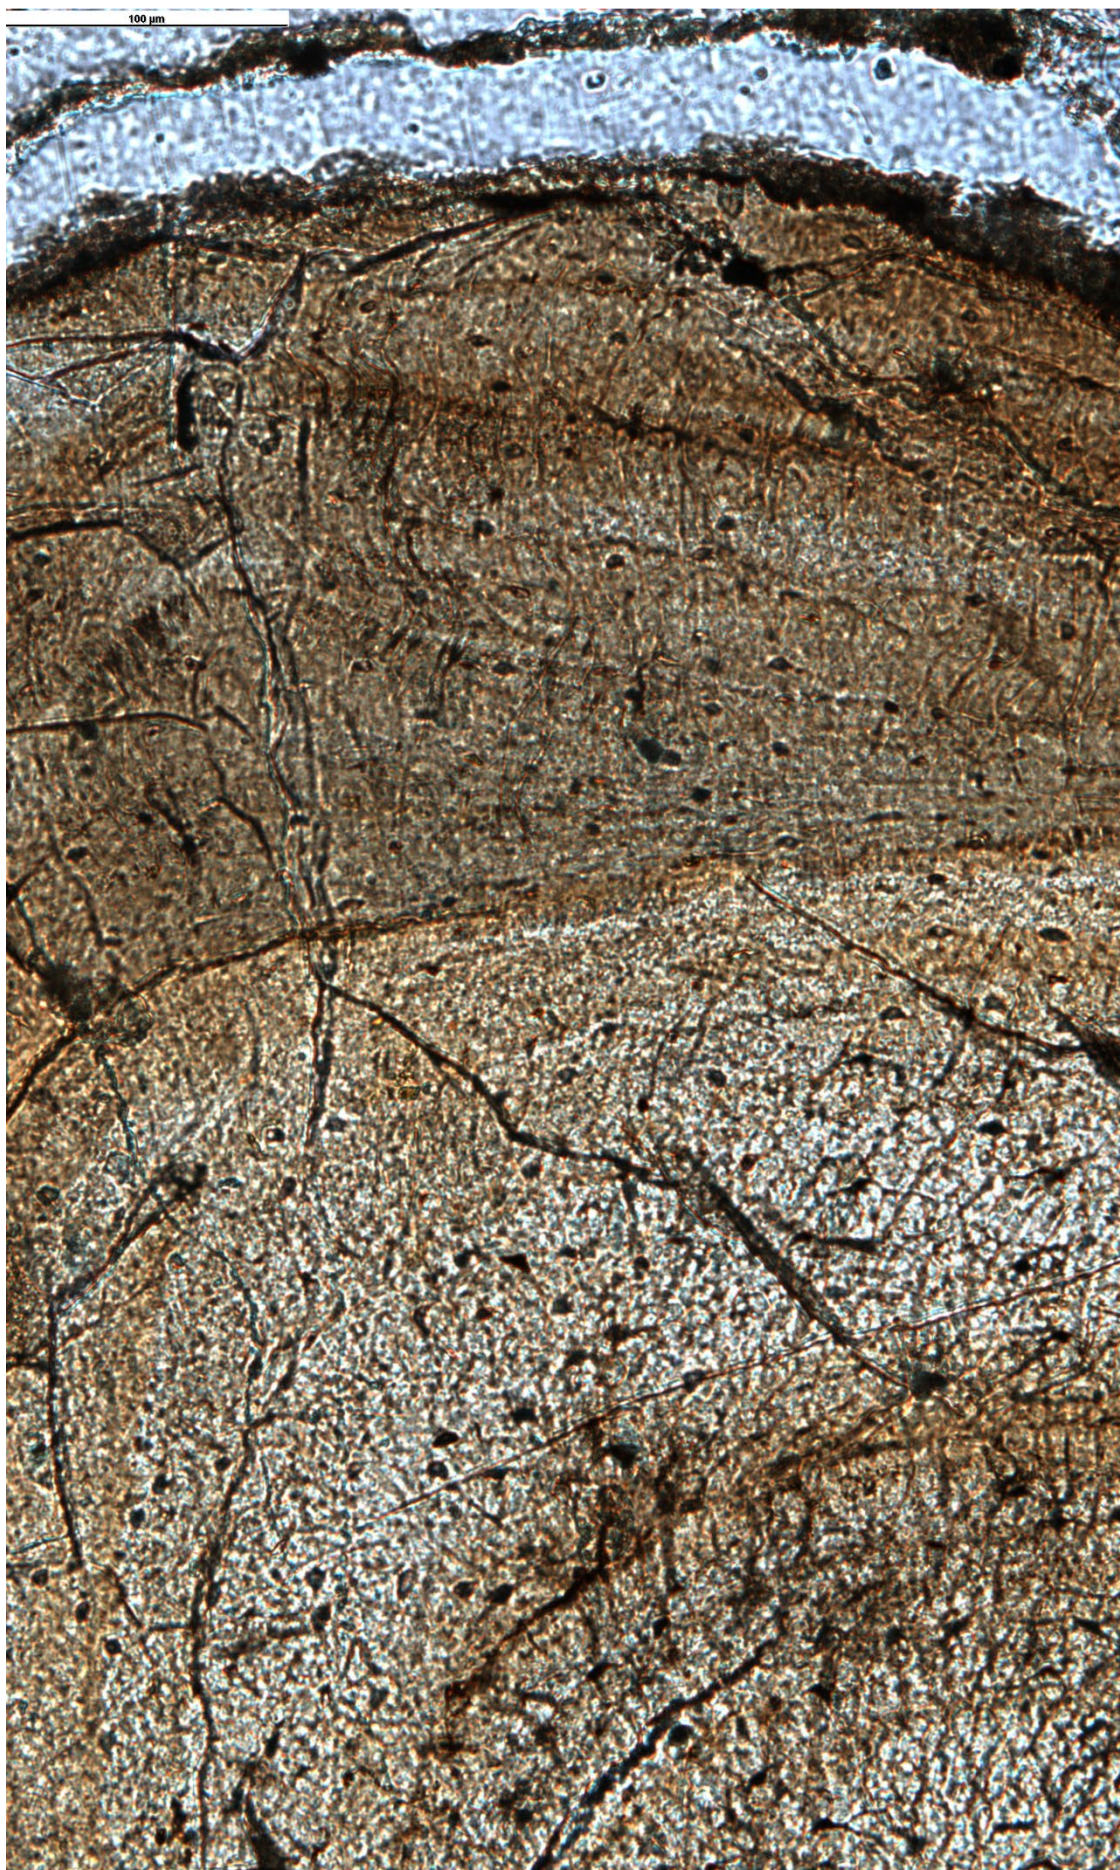

1.6 Thin section X-2744M at multiple resolutions

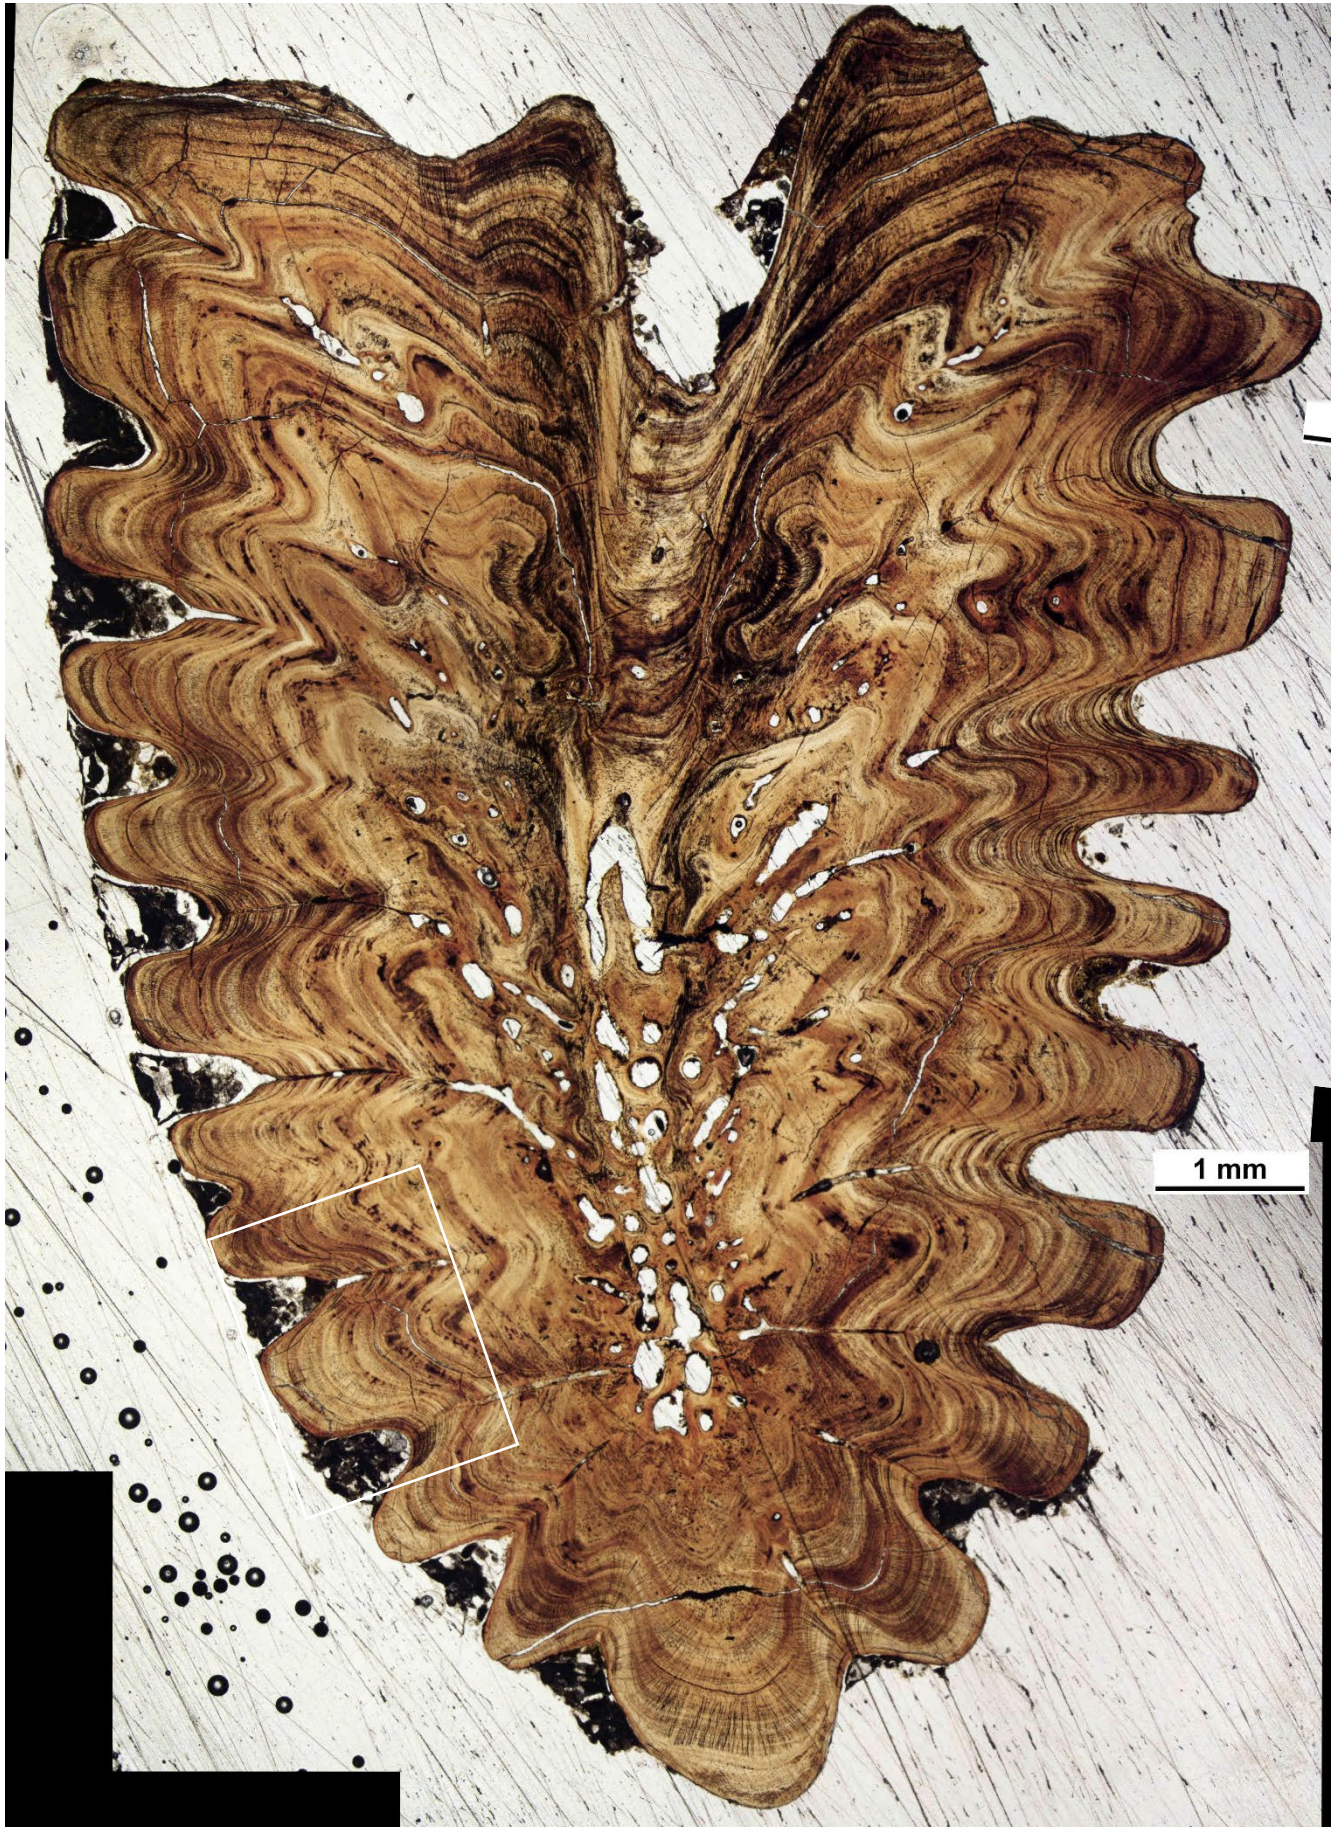

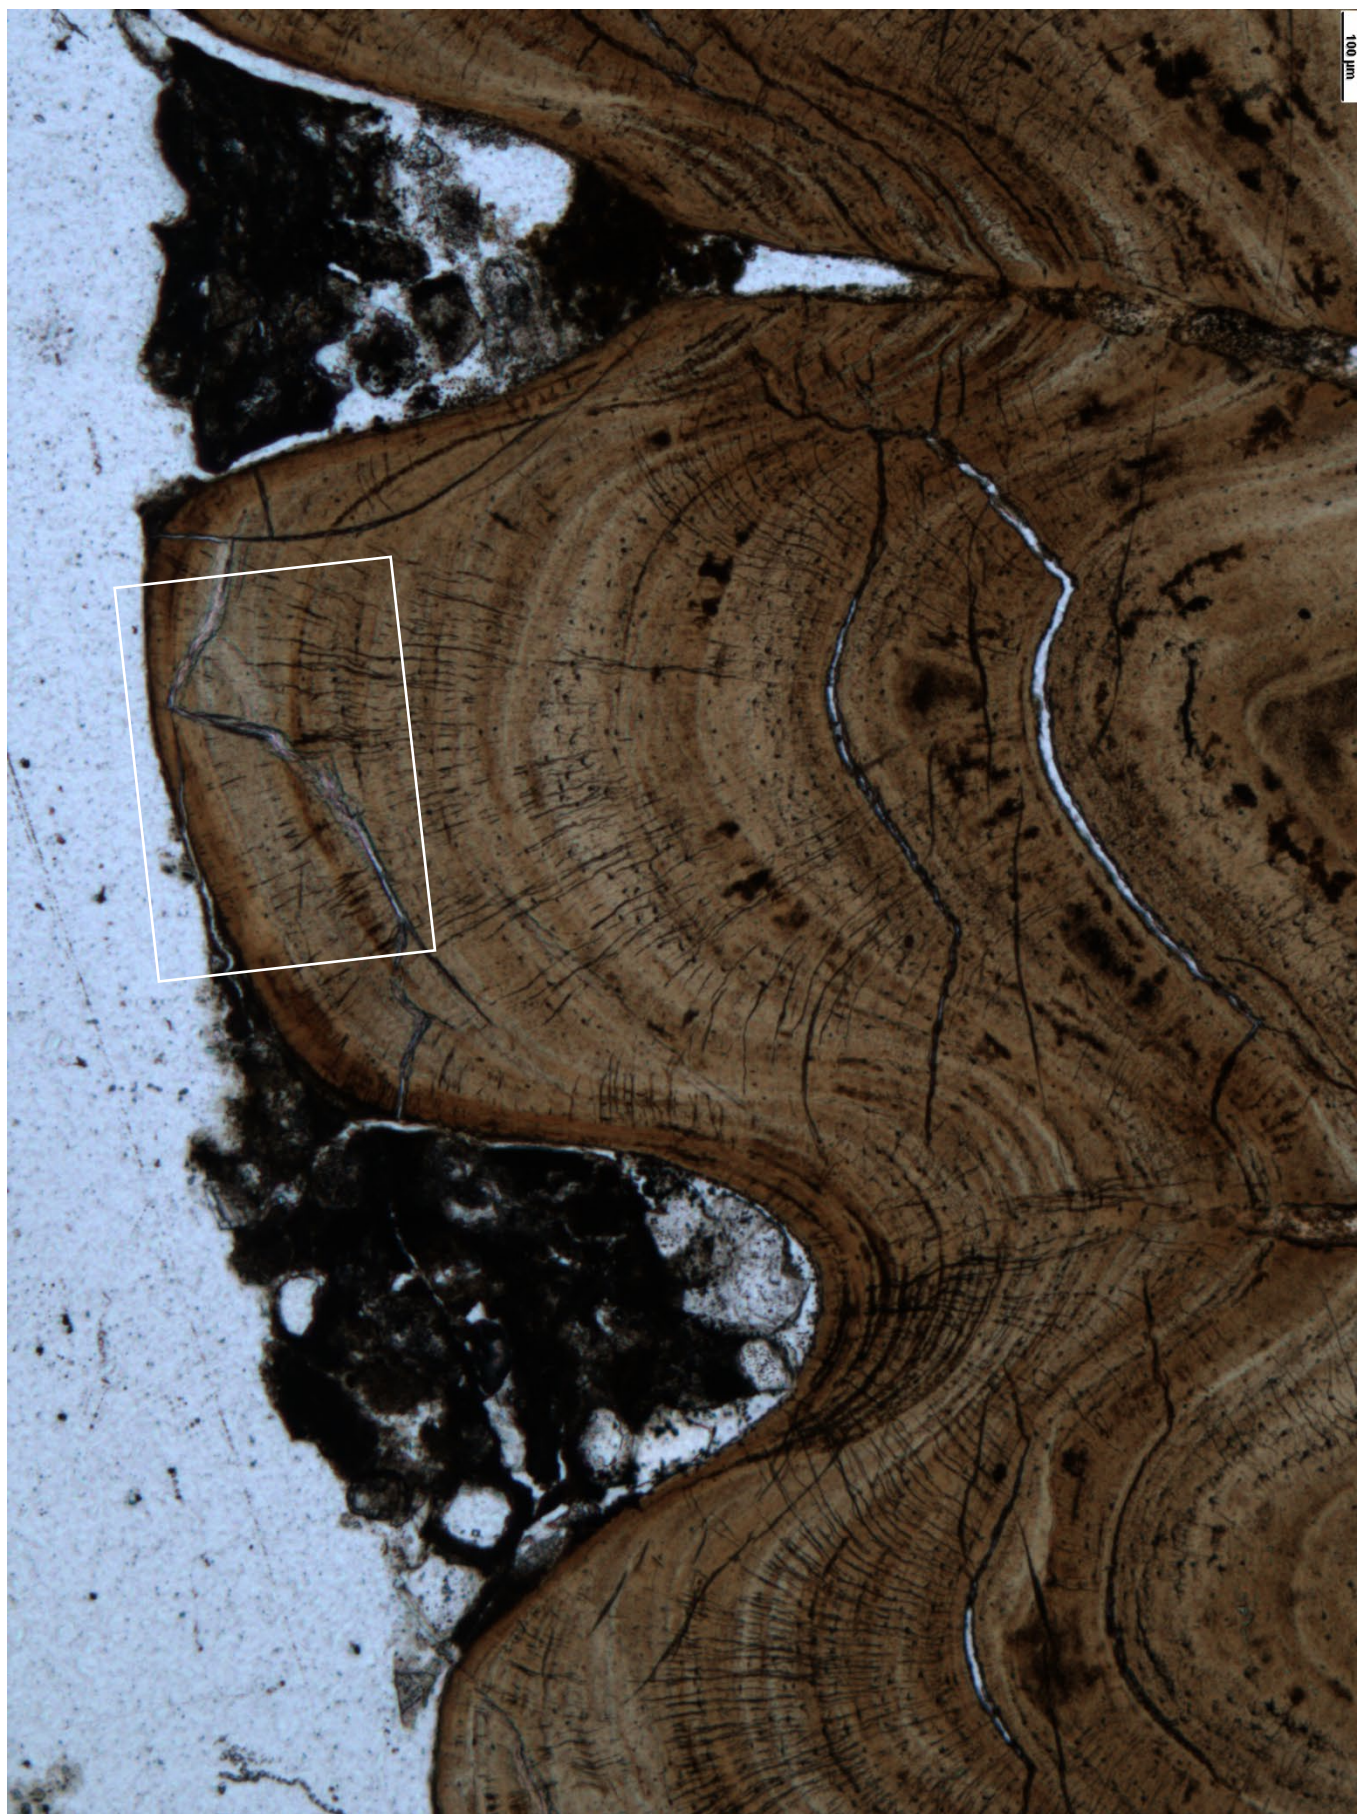

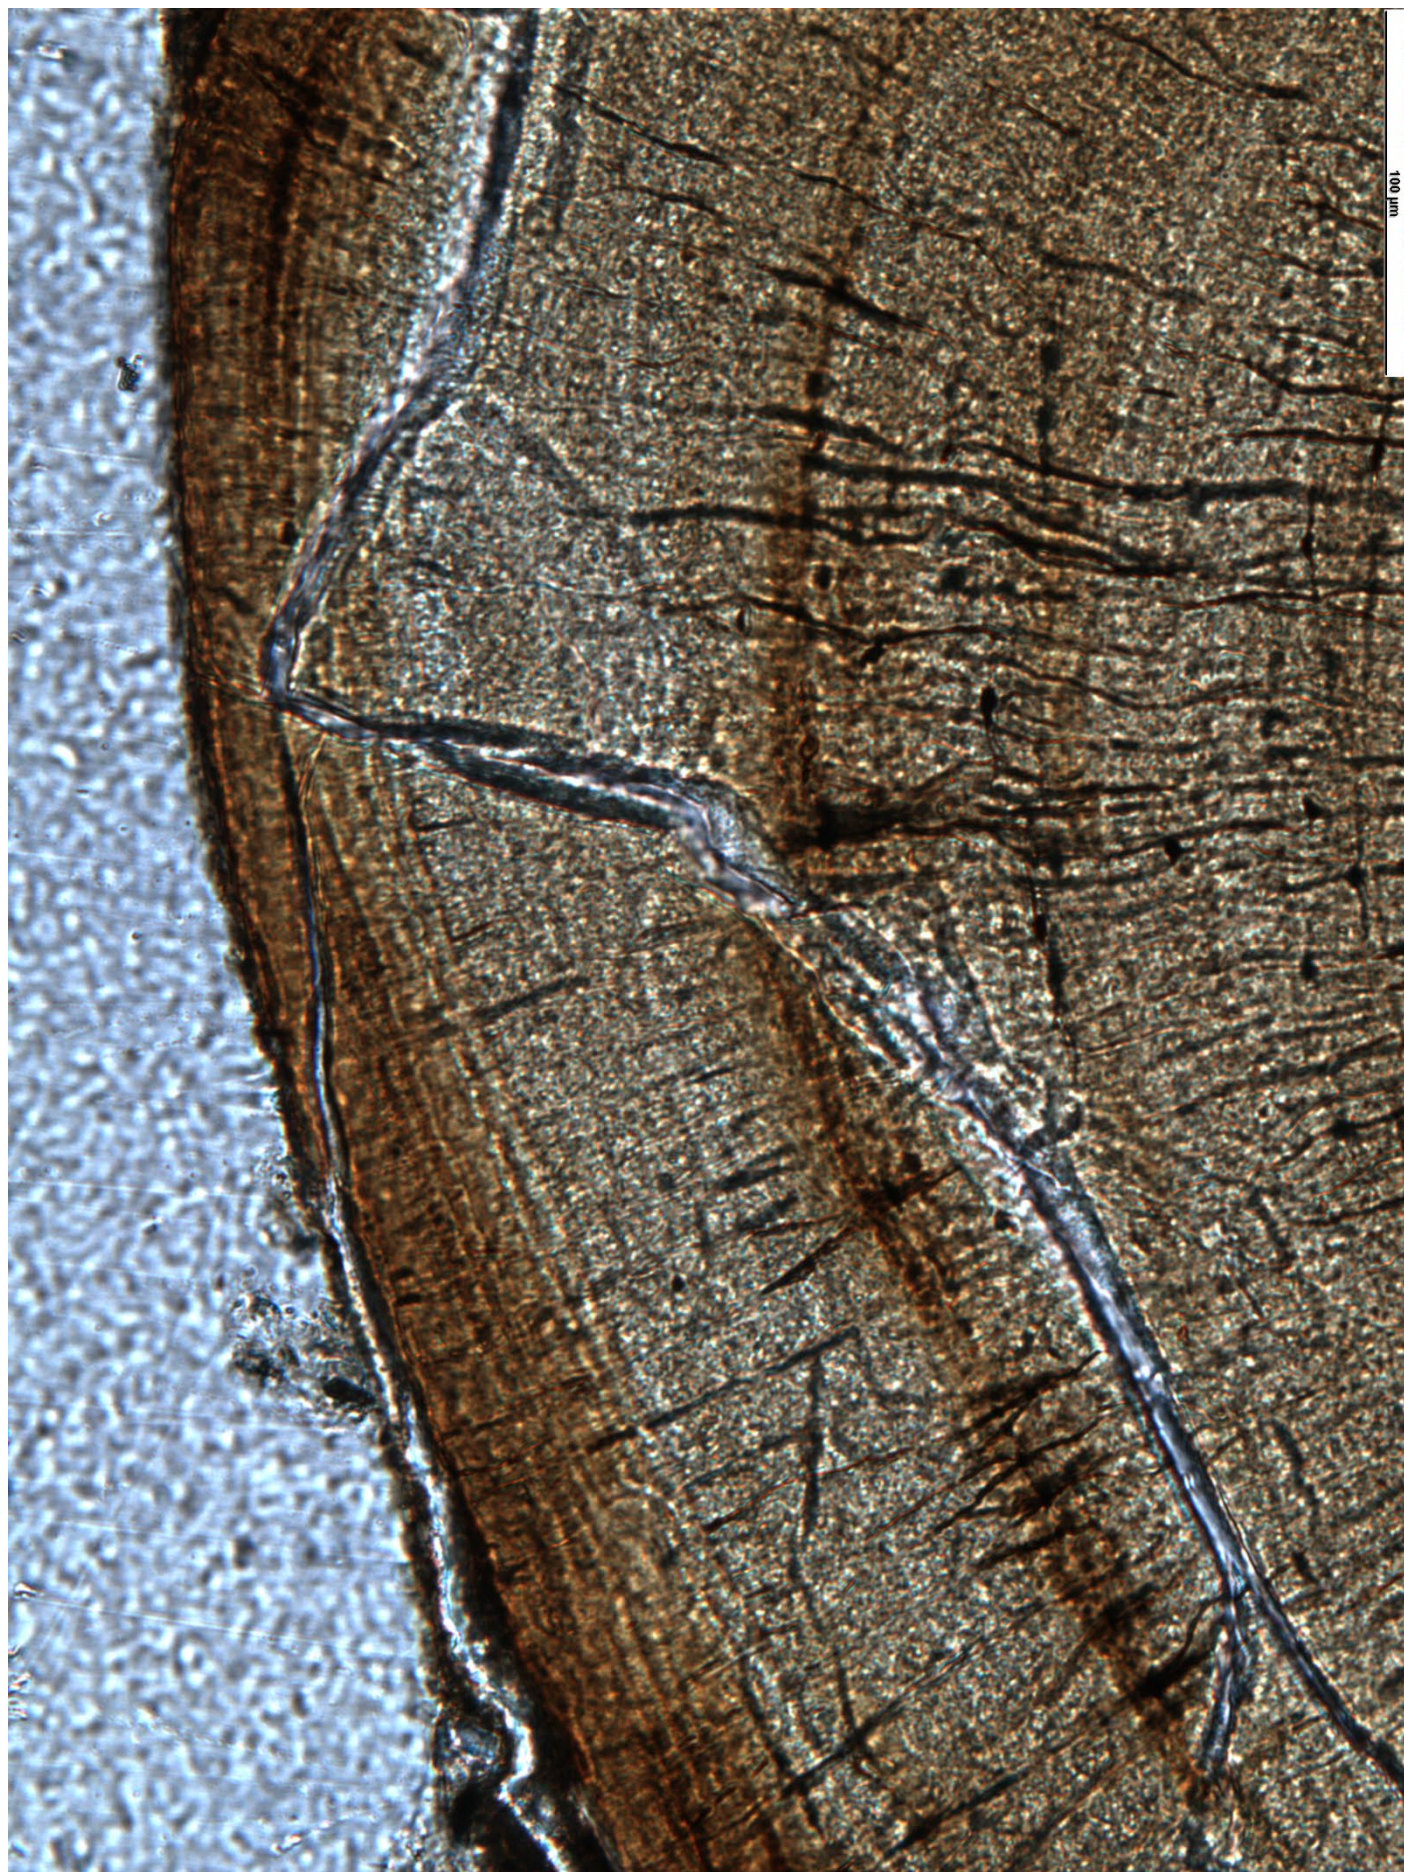

## 2. Micro X-ray fluorescence

### 2.1 Elemental spectrum for each specimen

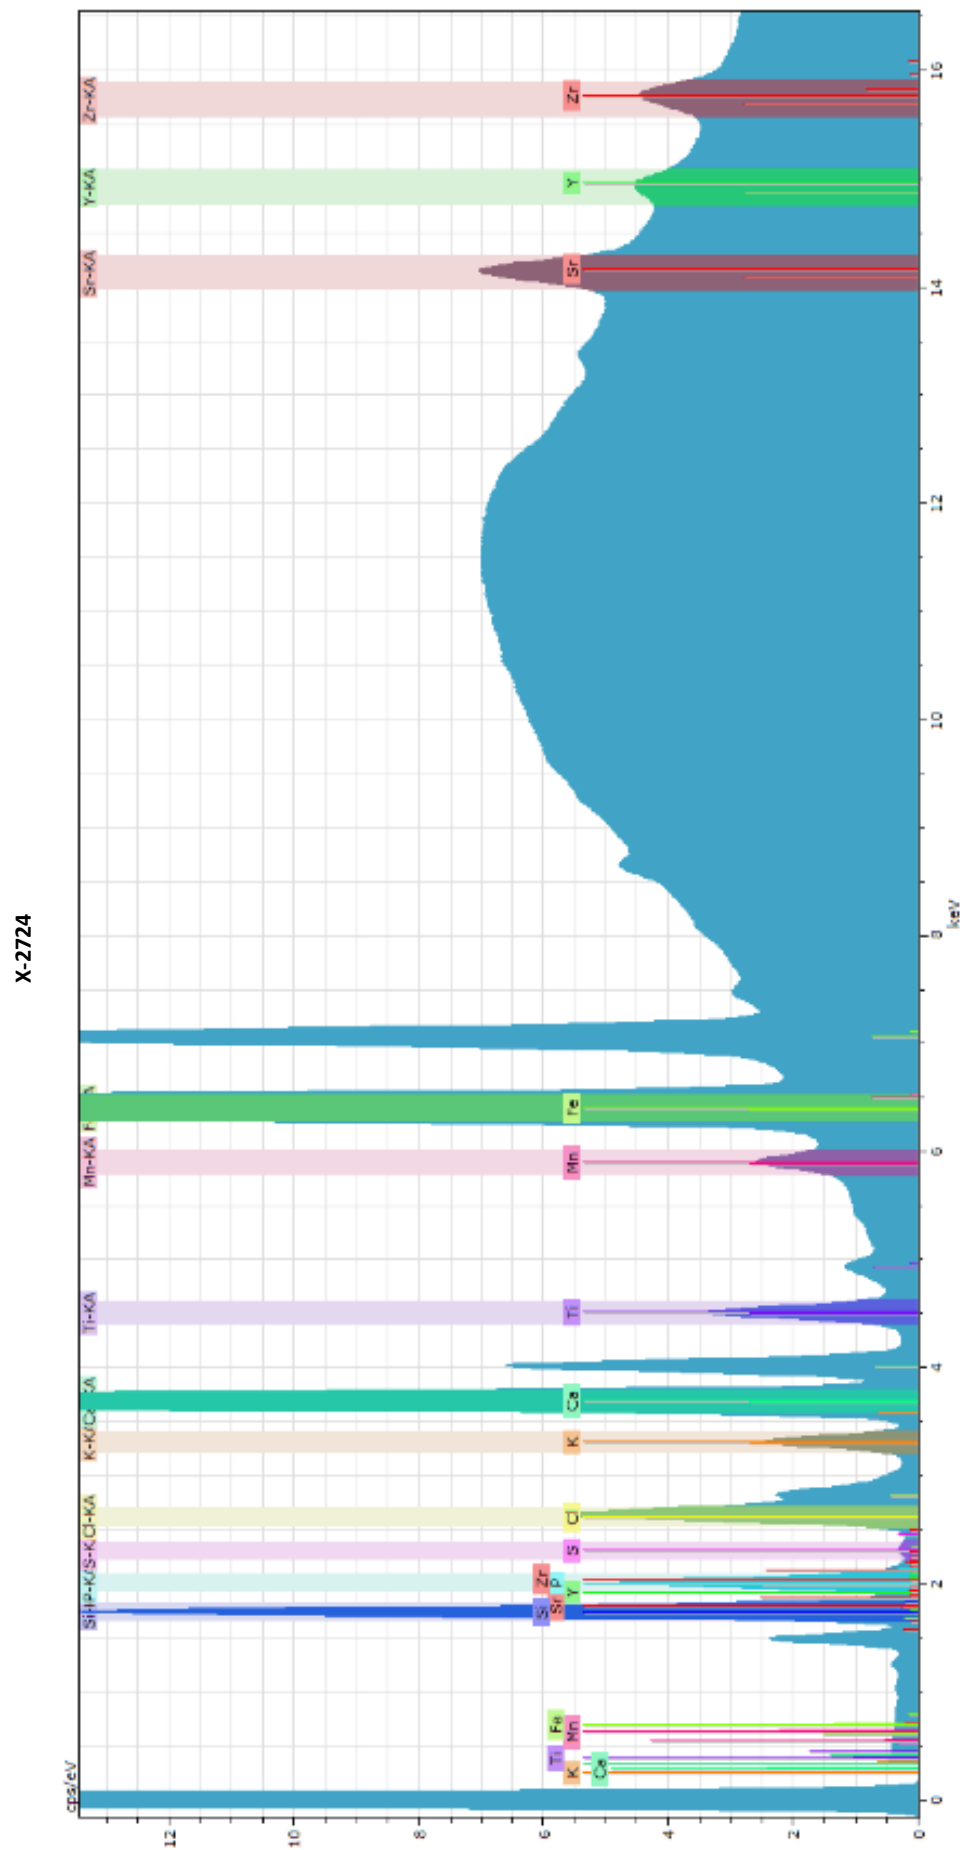

MDX-3

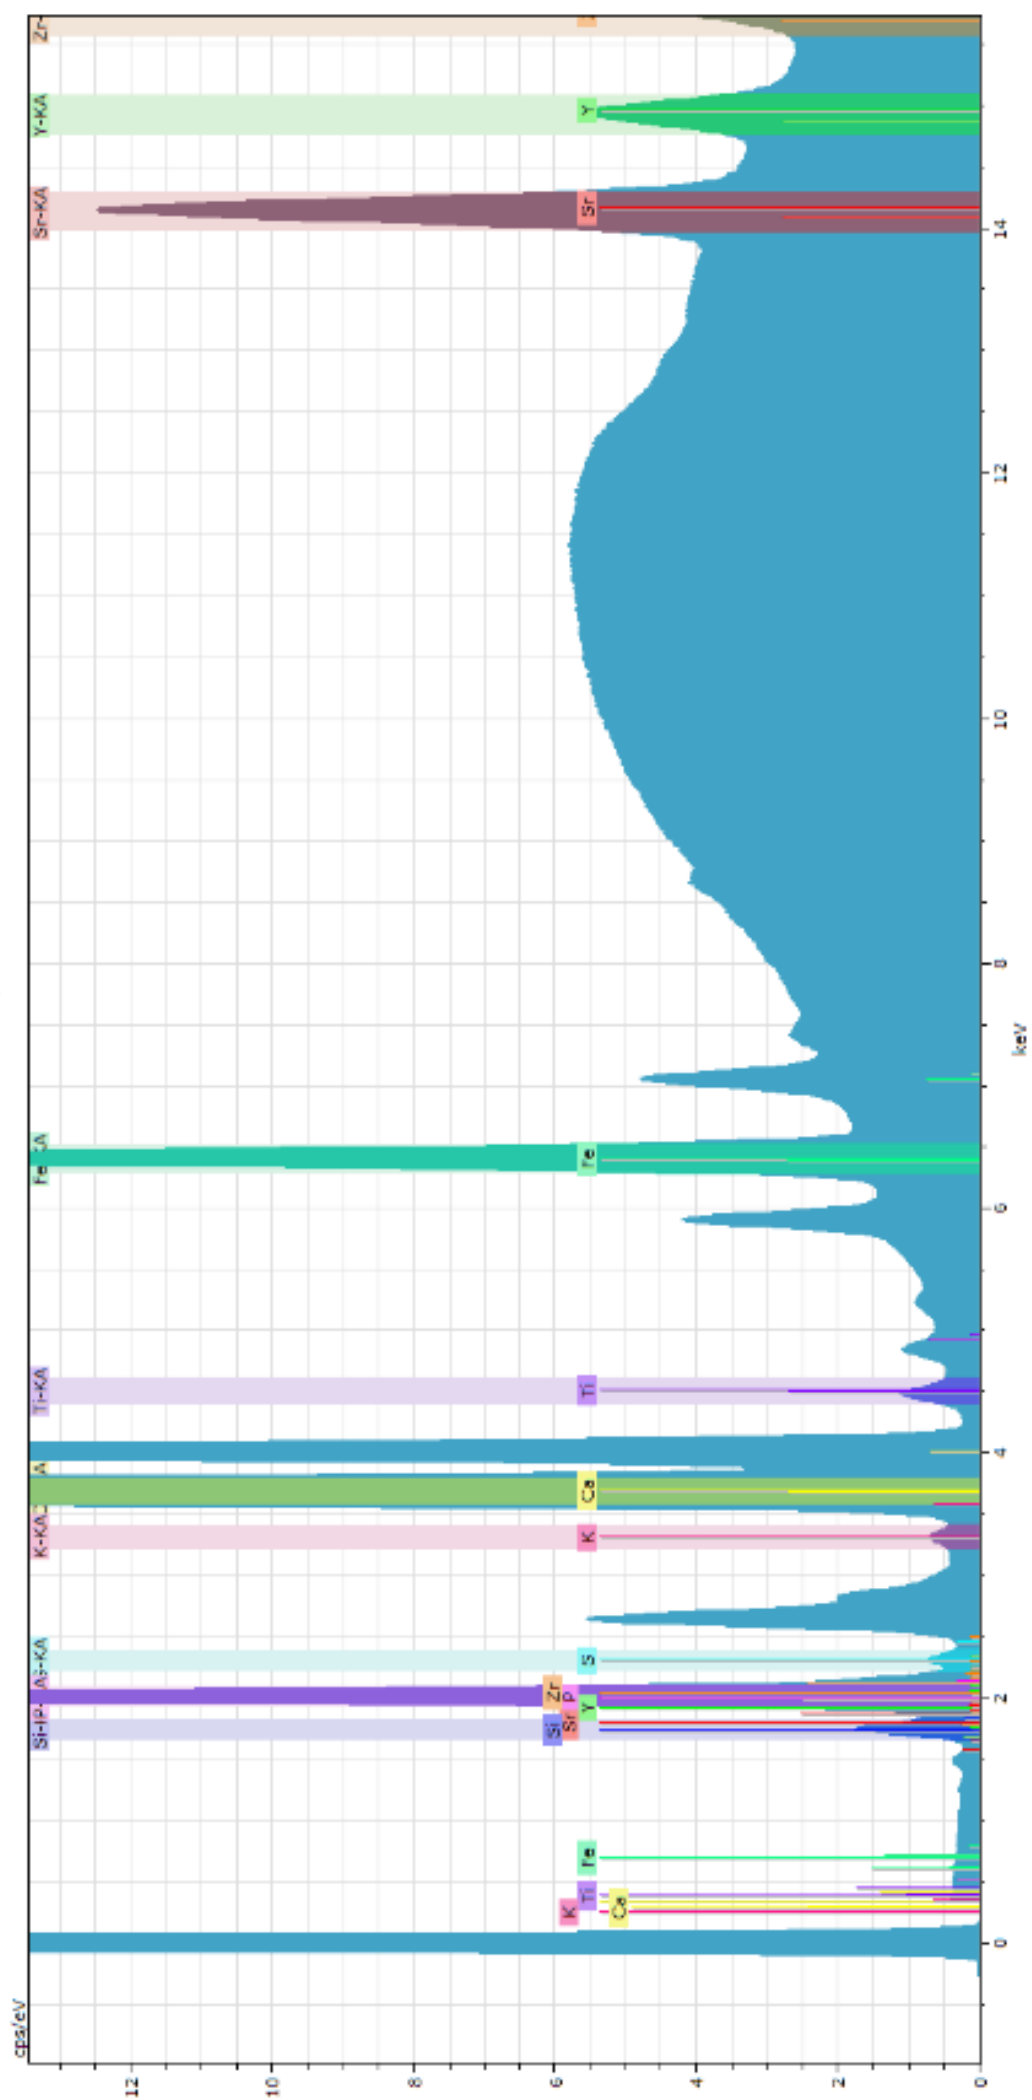

X-2733a, plus sediment and X-2733b

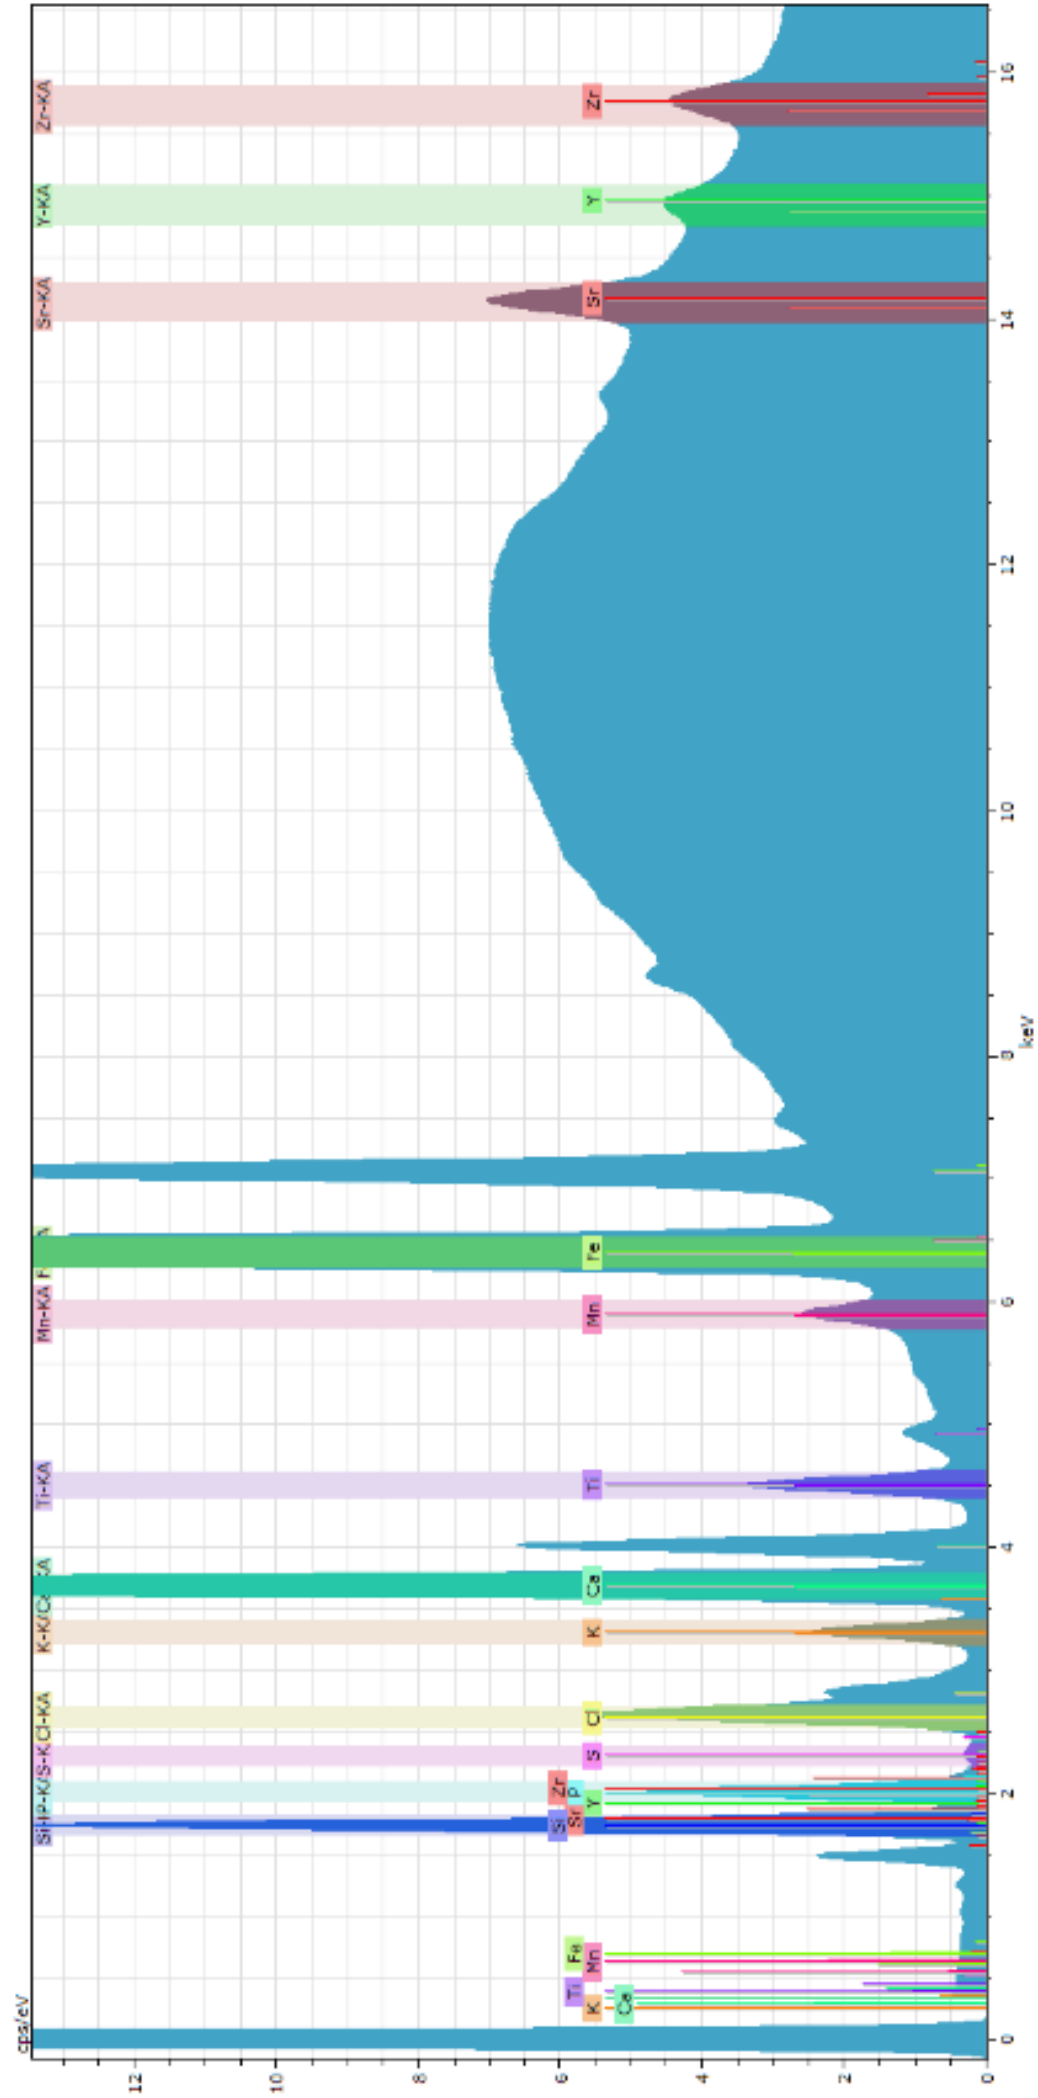

X-2743M

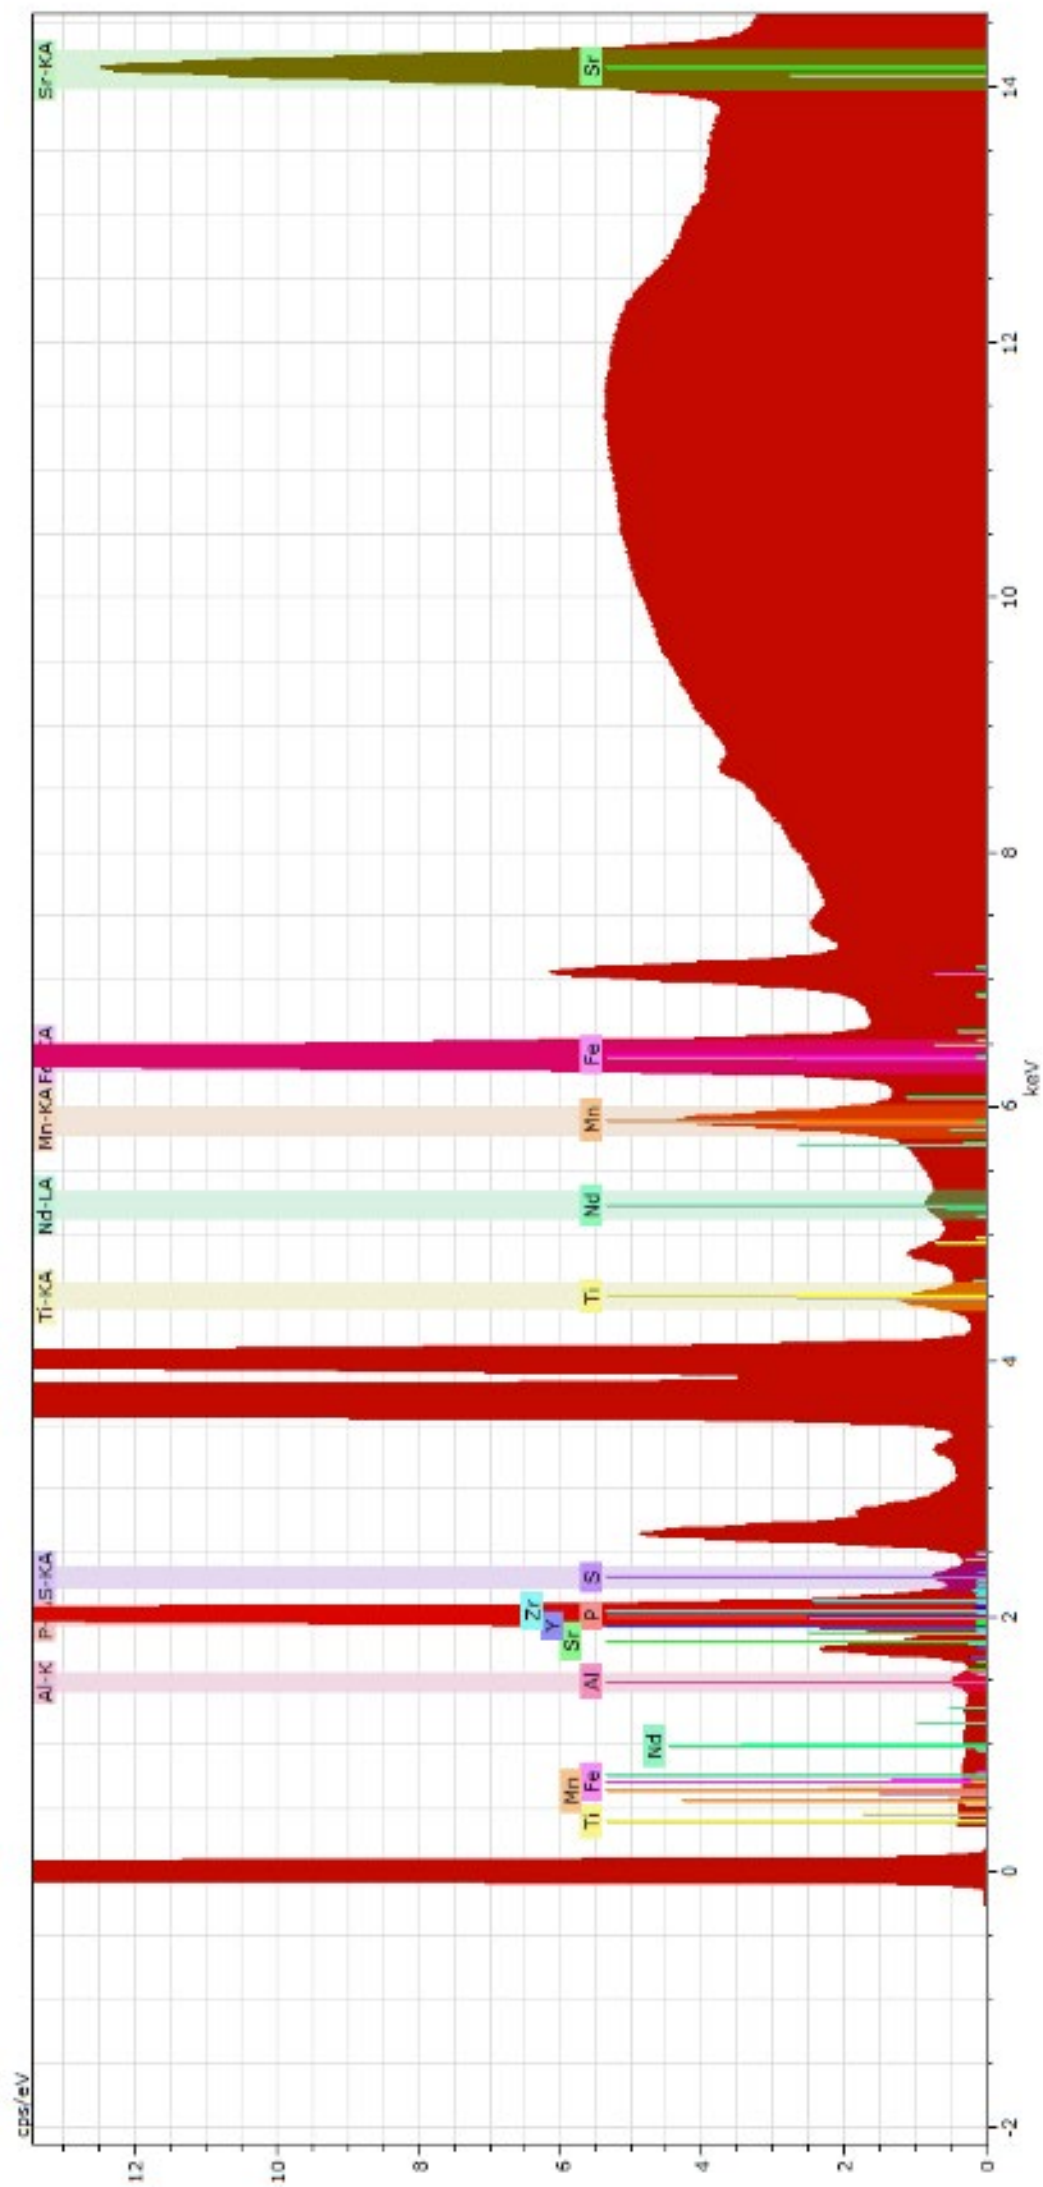

X-2744M

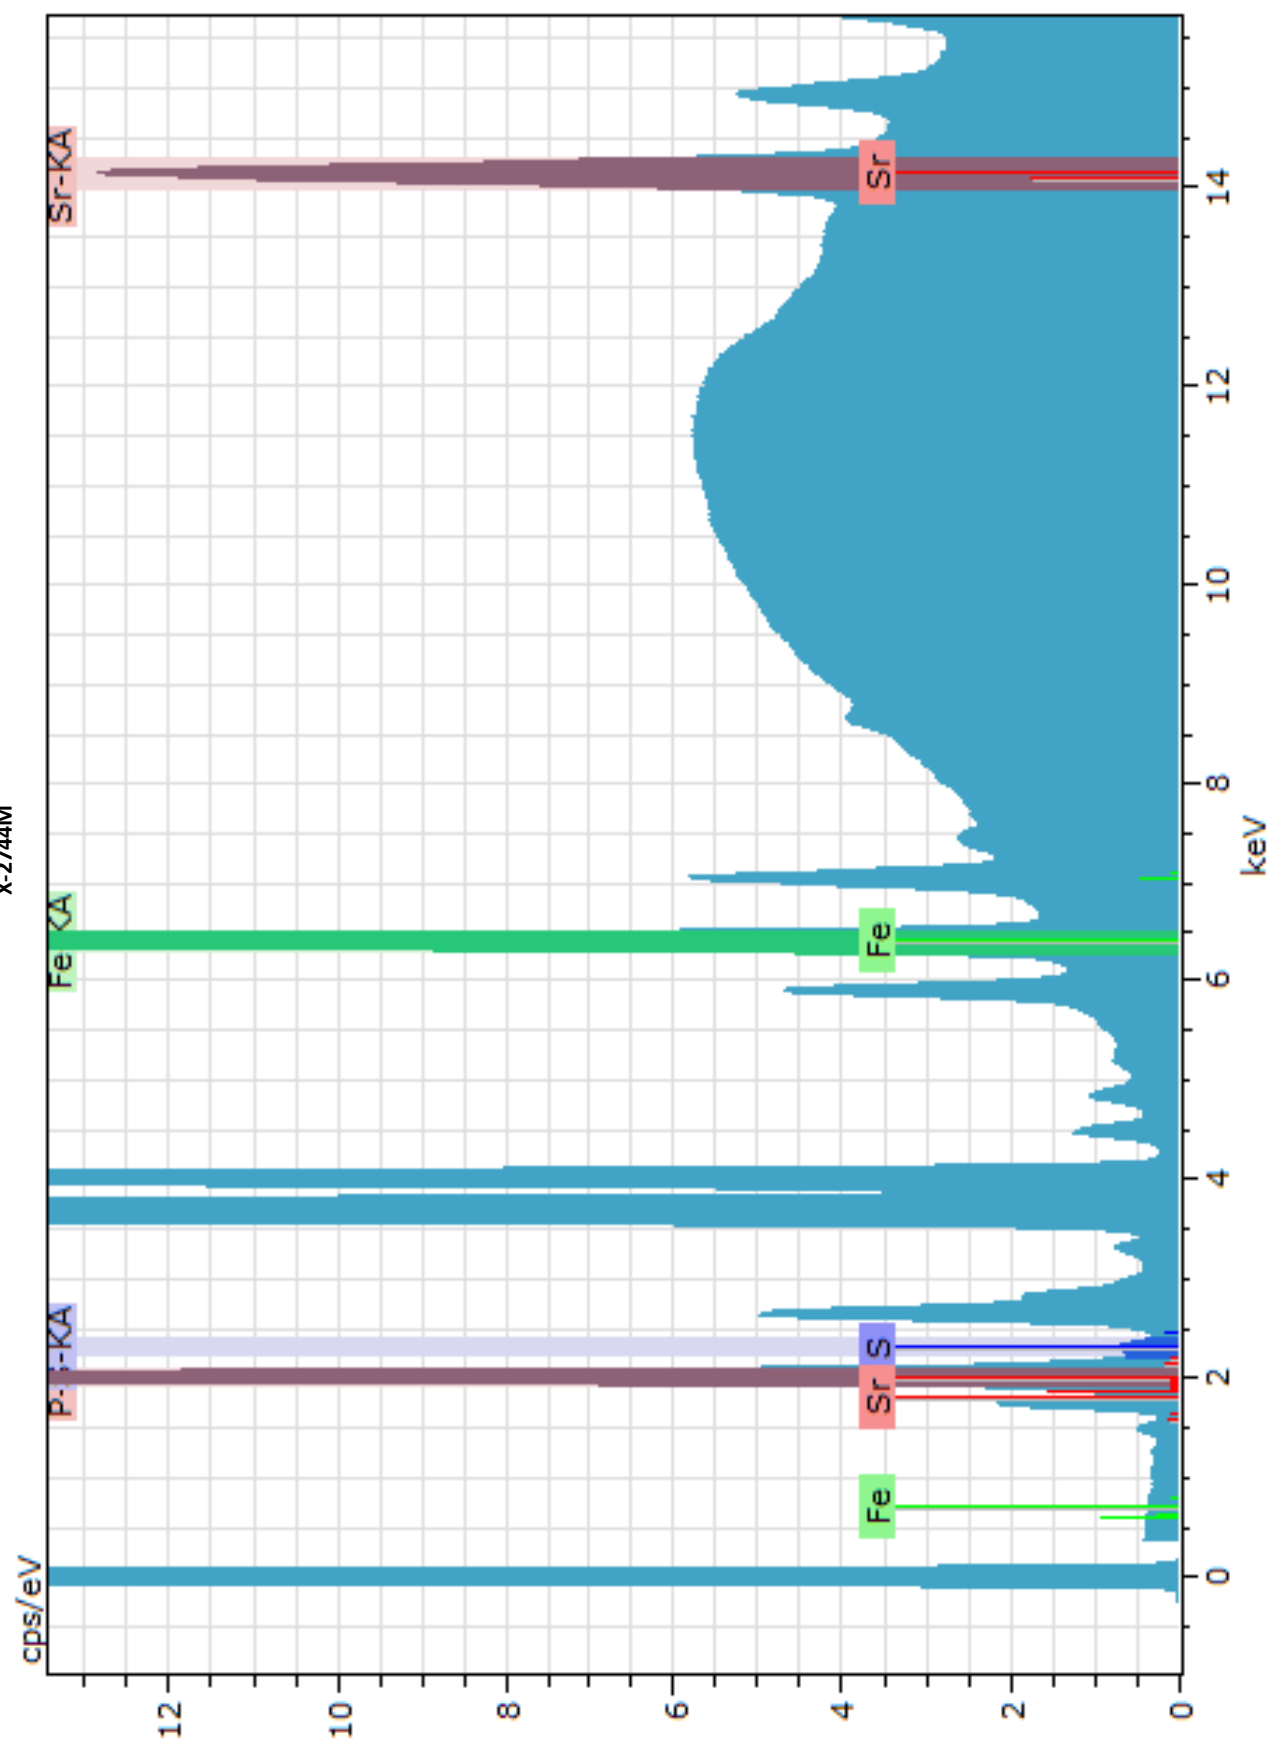

## 2.2 Elemental distribution map of Ca, P and Mn for each specimen

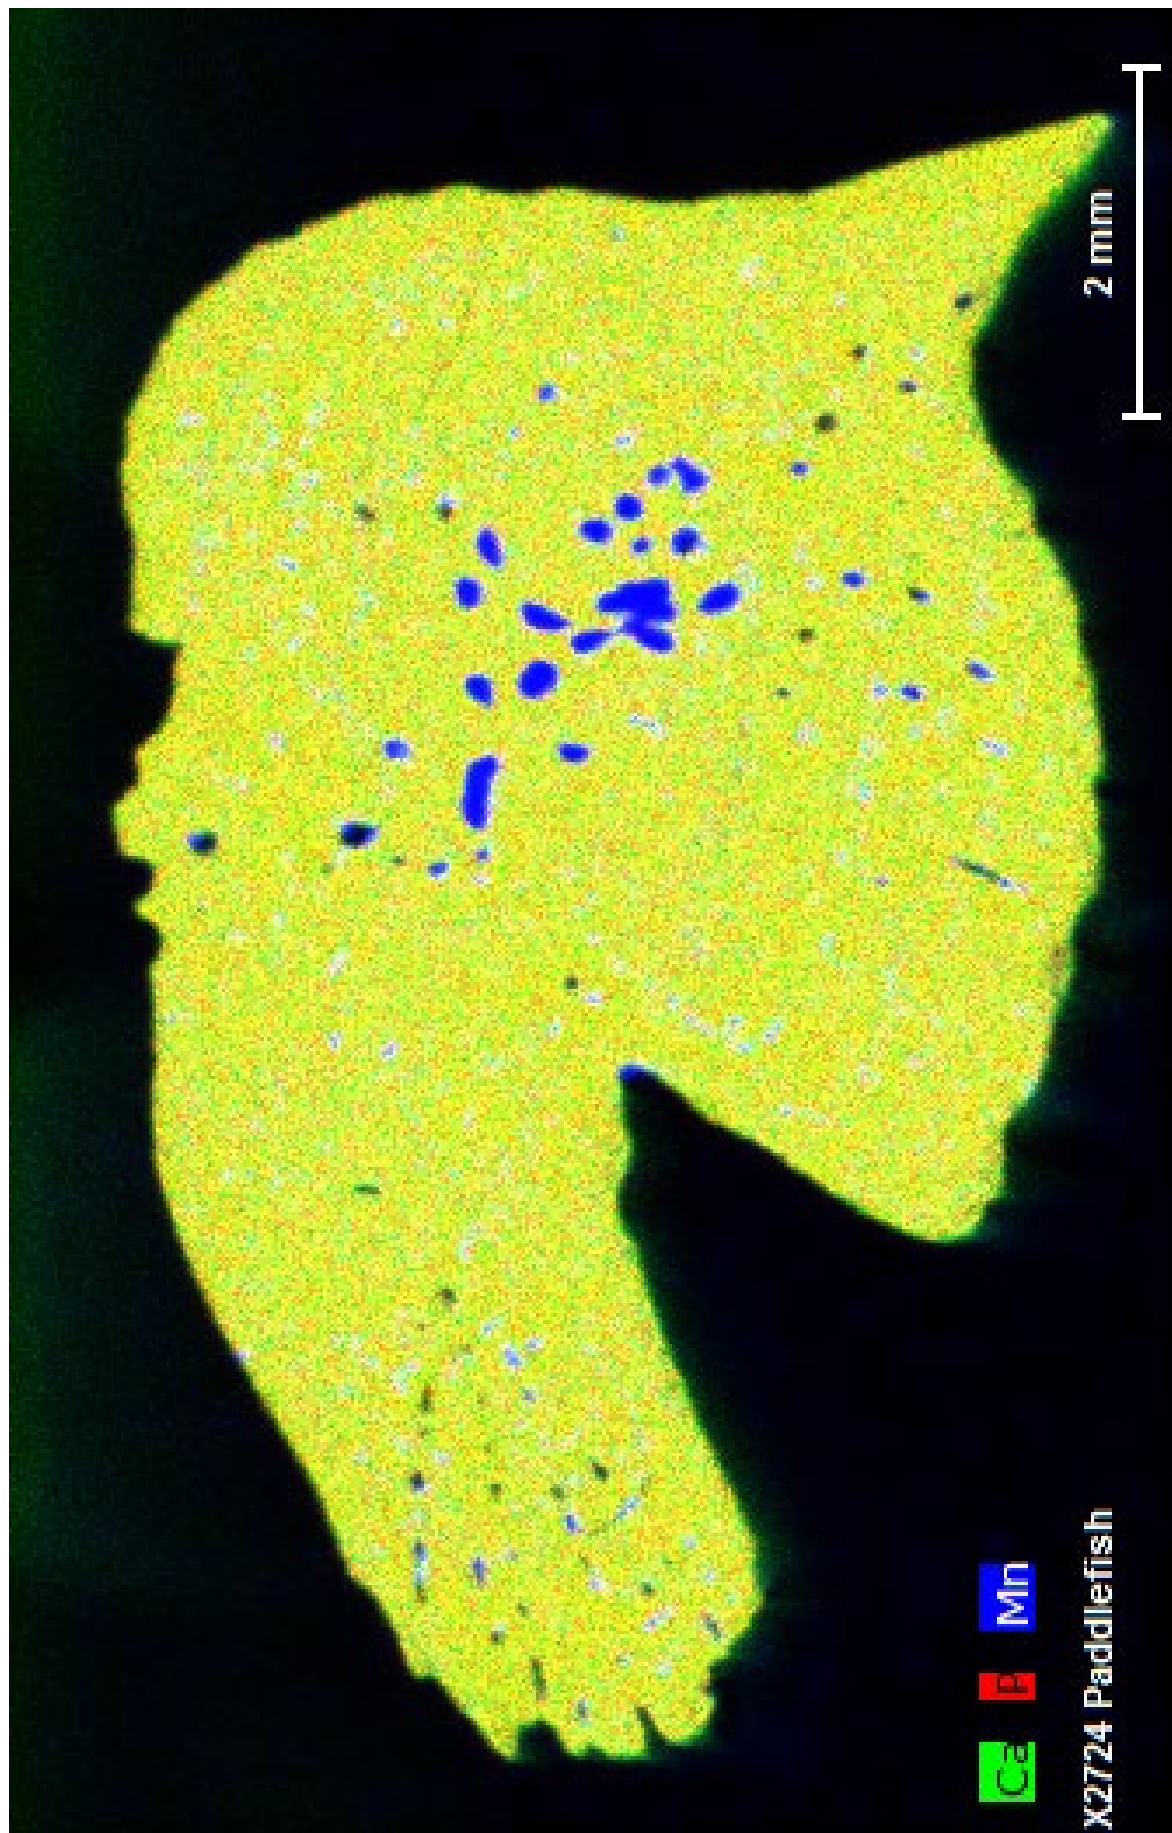

Ca P Mn

MDX3 sturgeon

3 mm

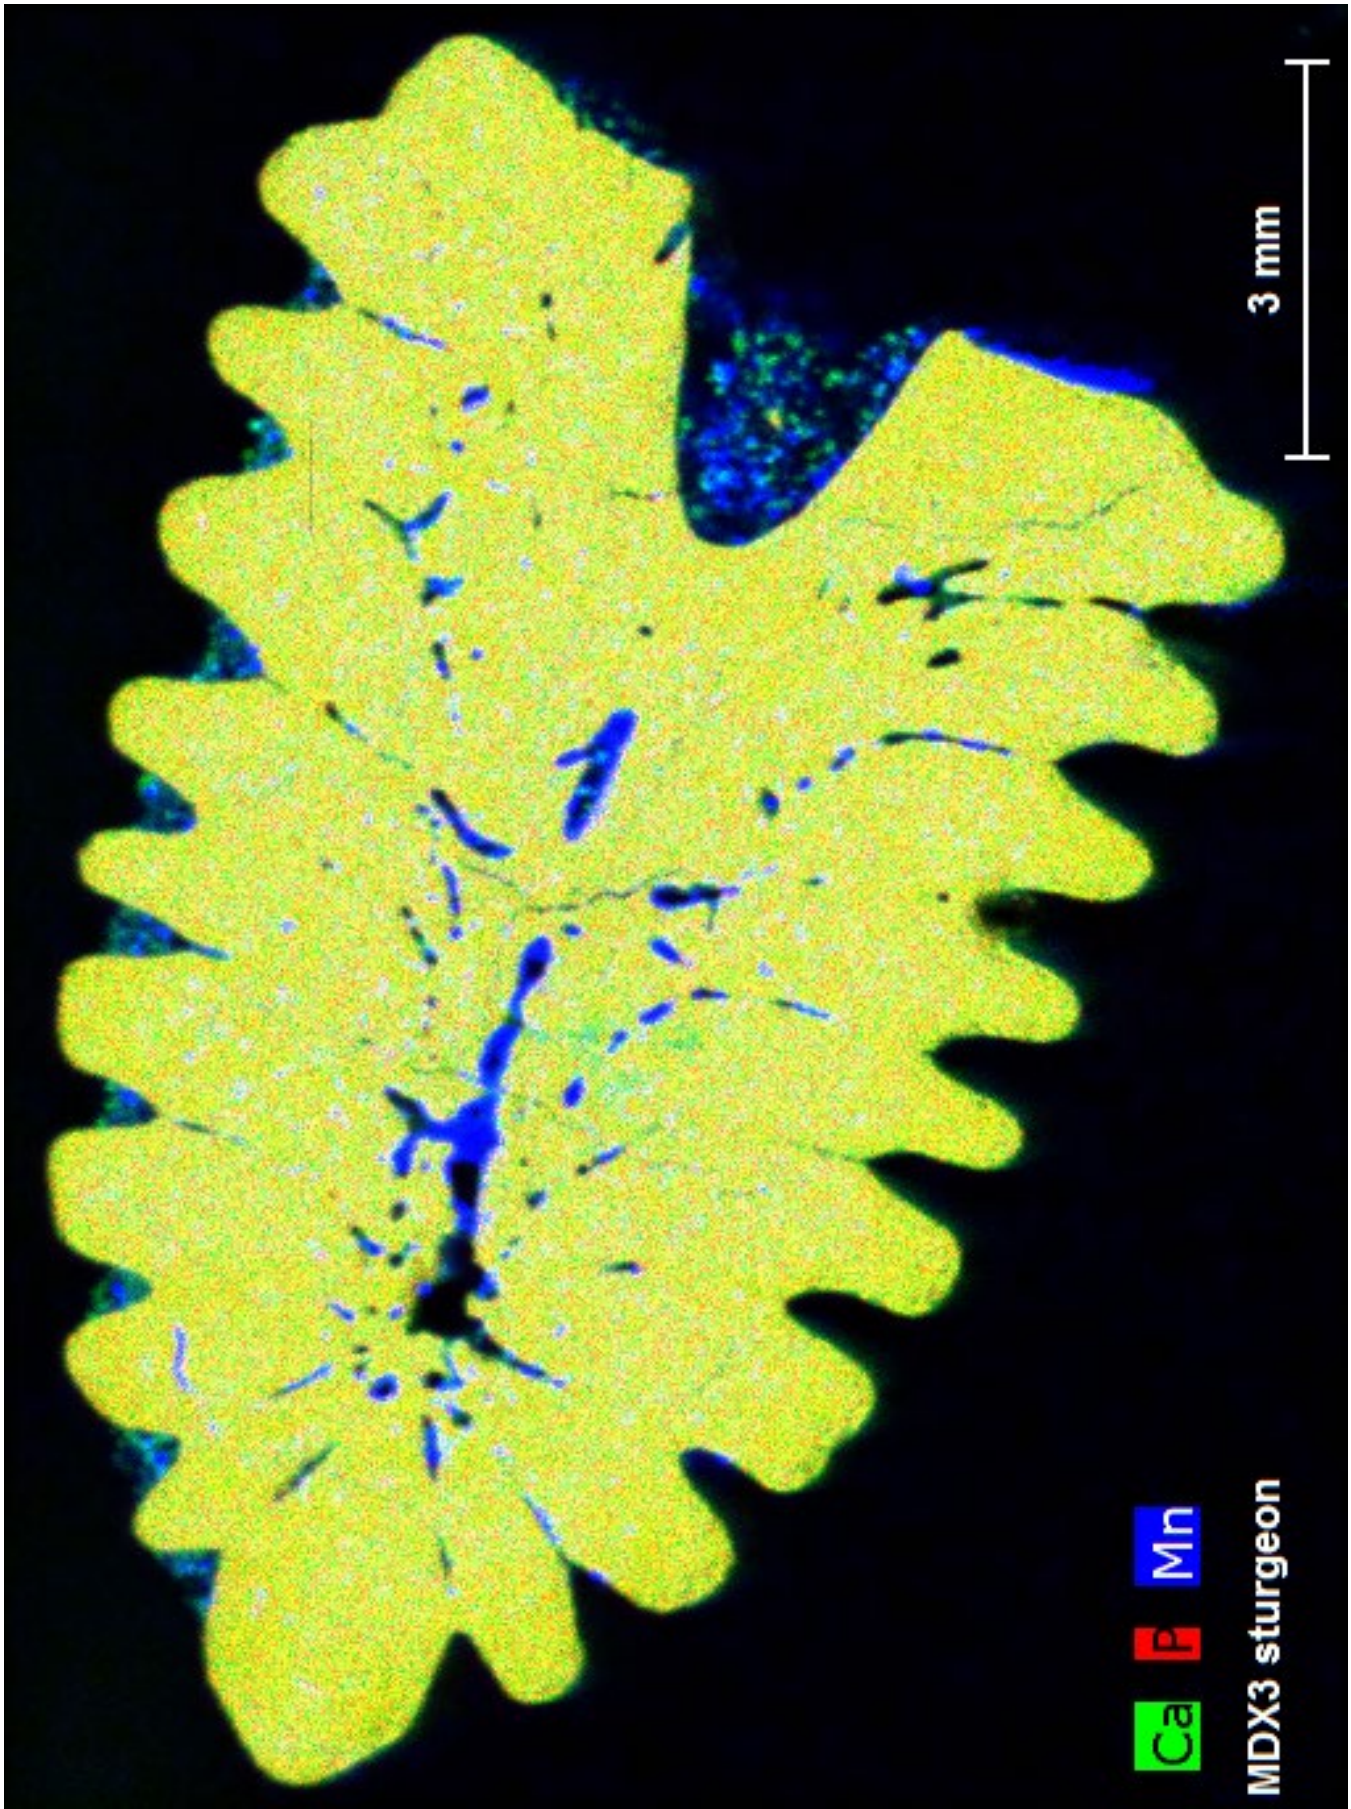

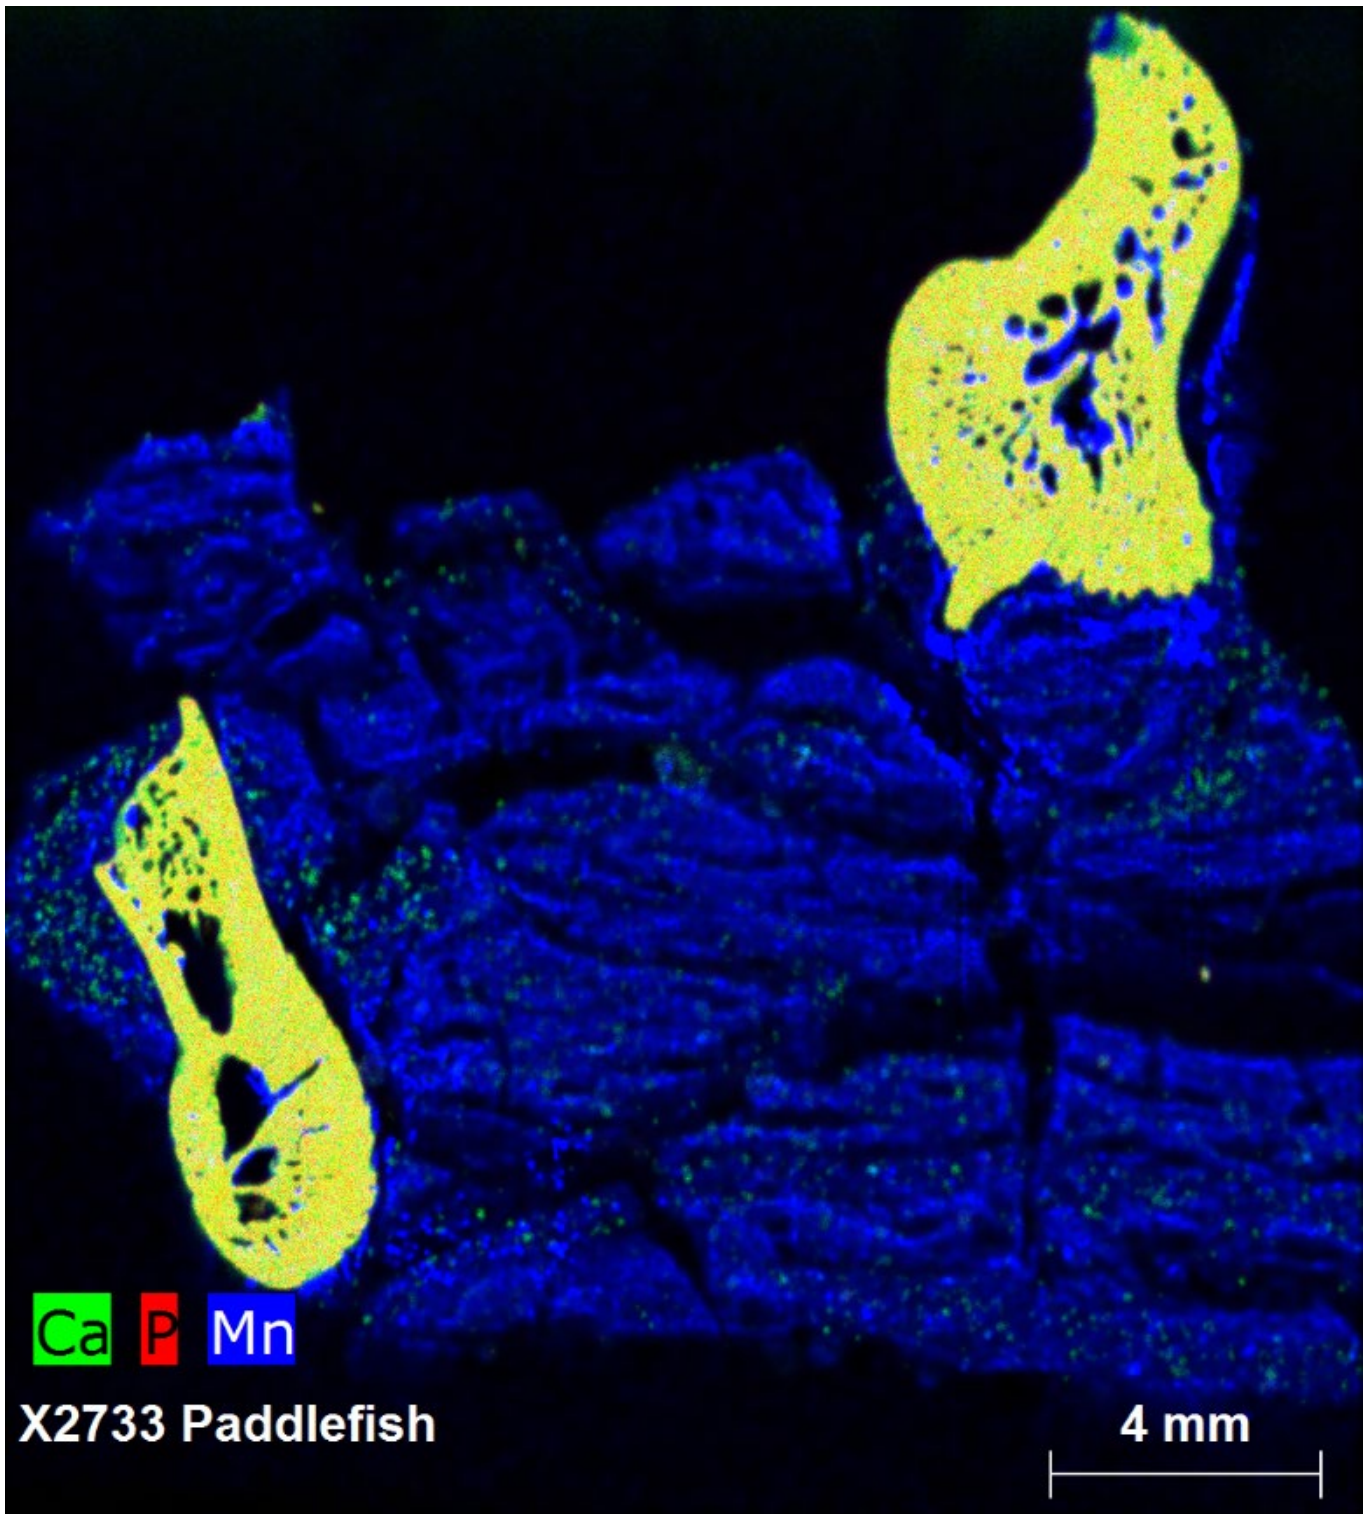

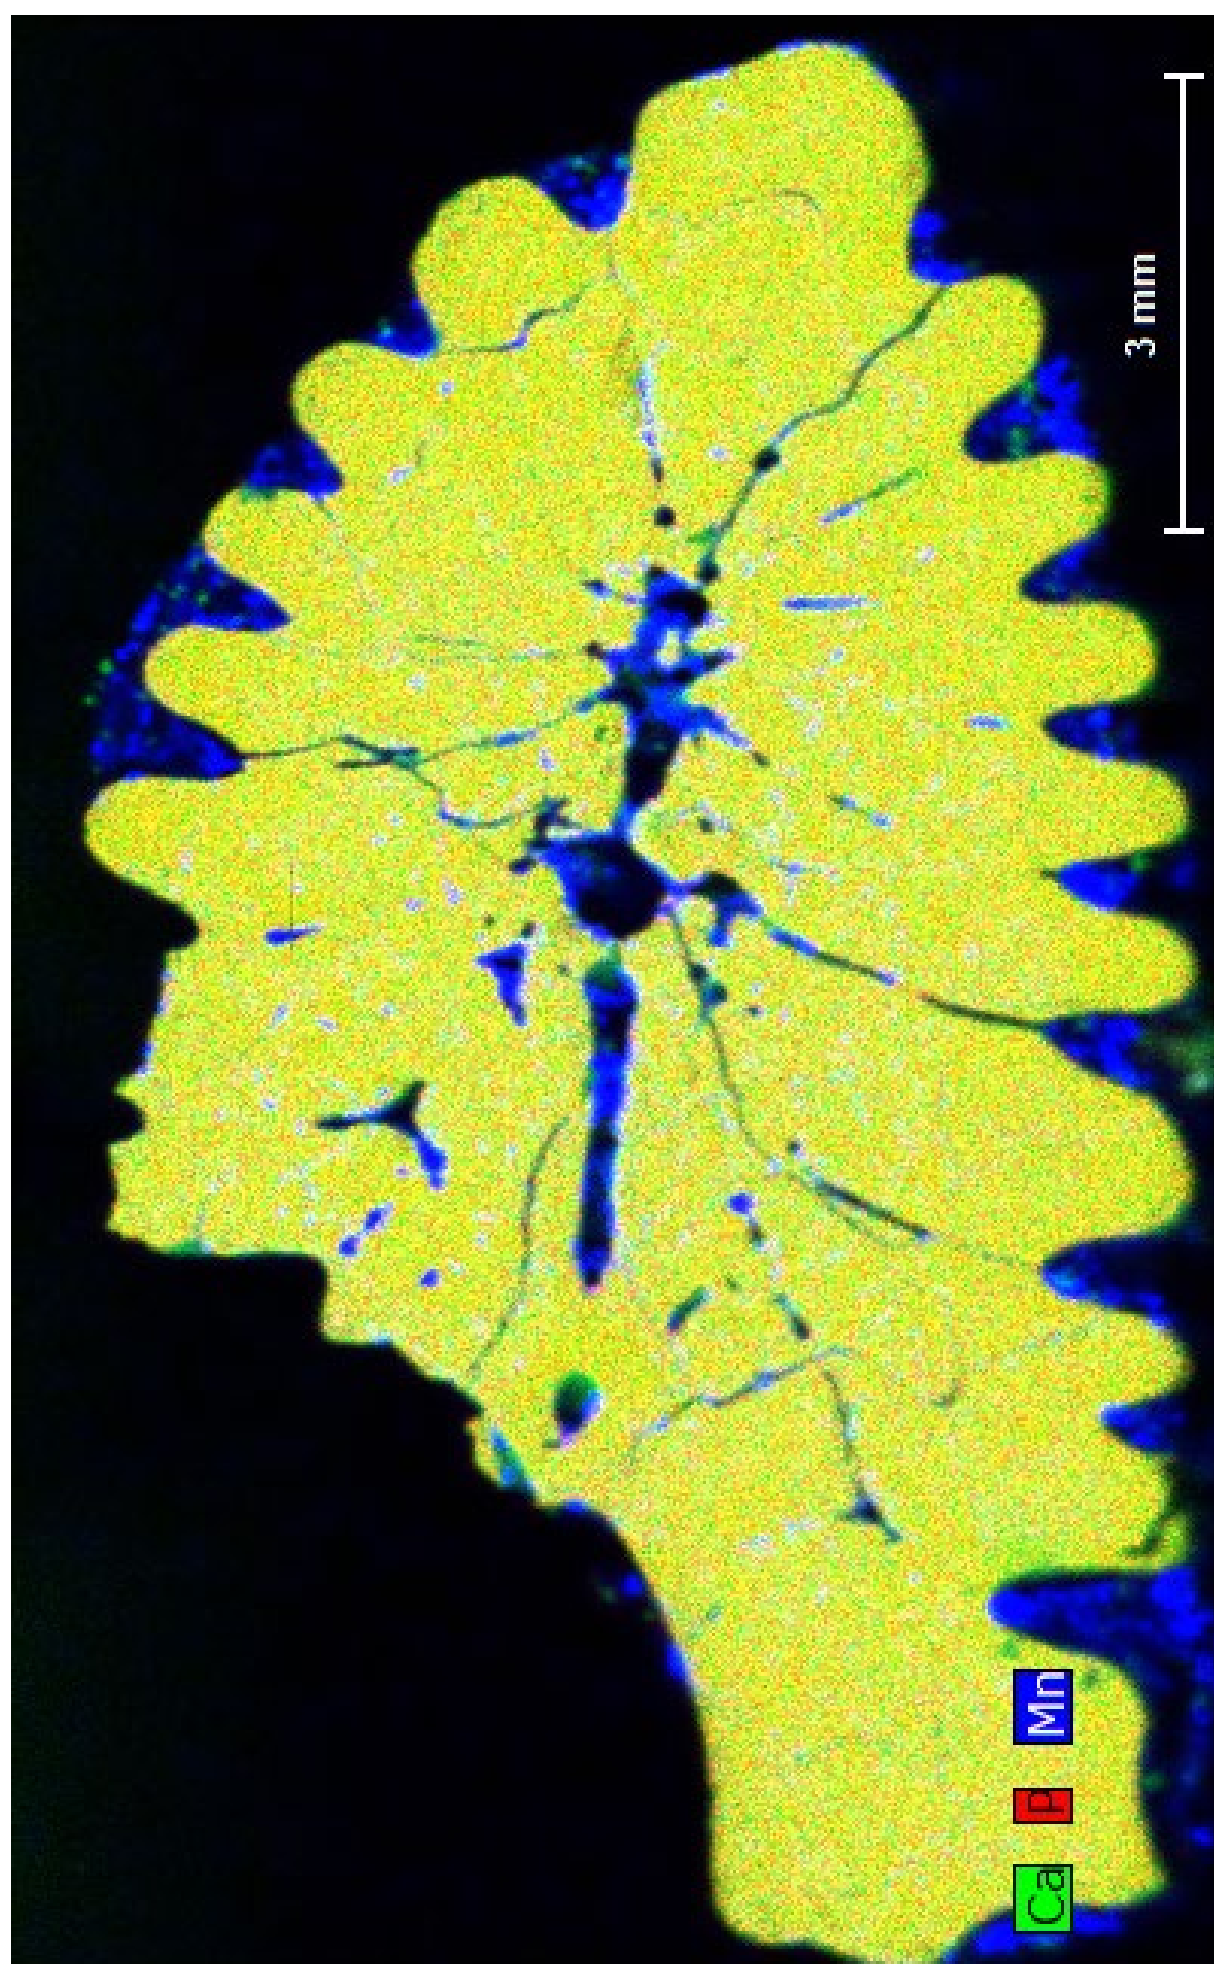

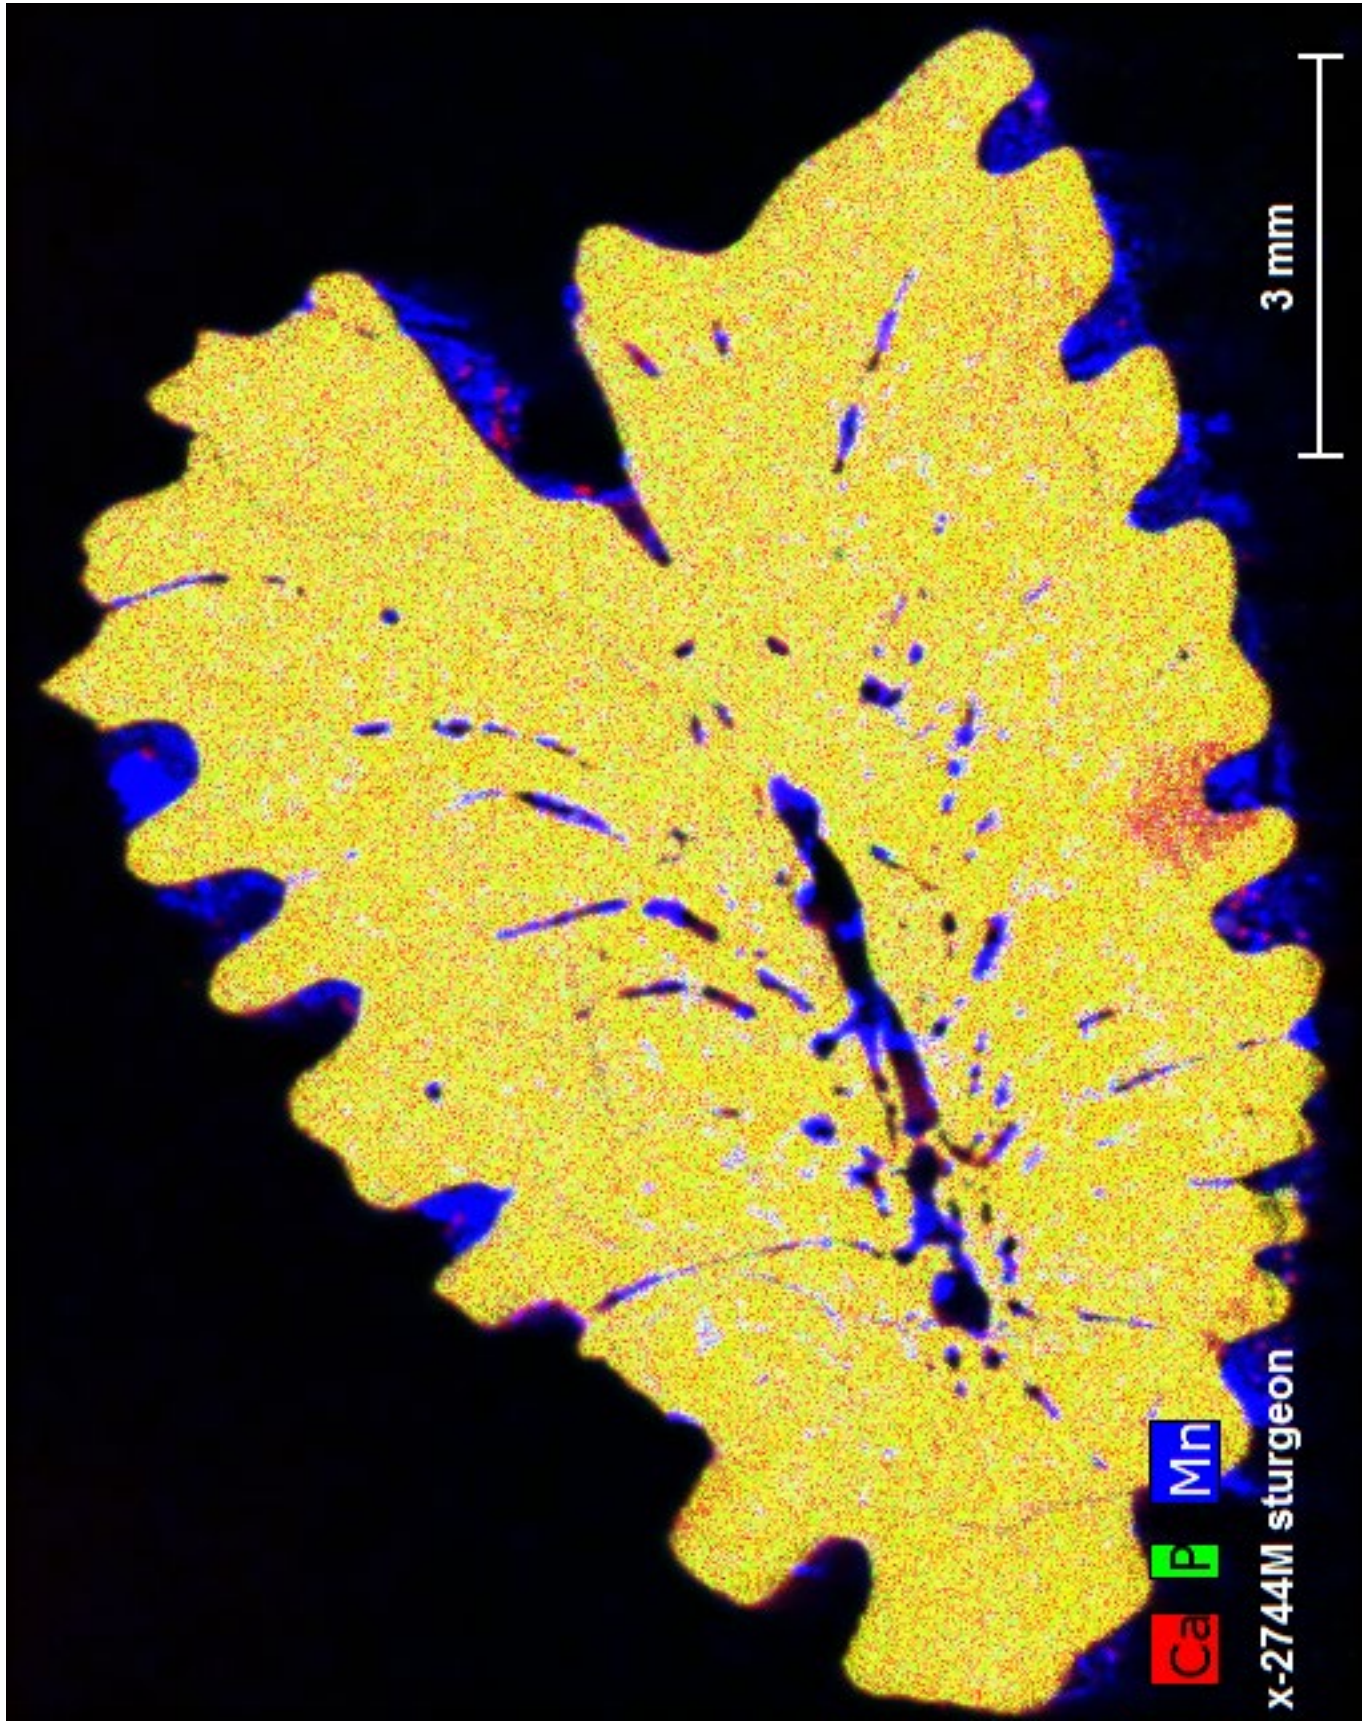

### 2.3 Elemental distribution map of K, Si and Fe for each specimen

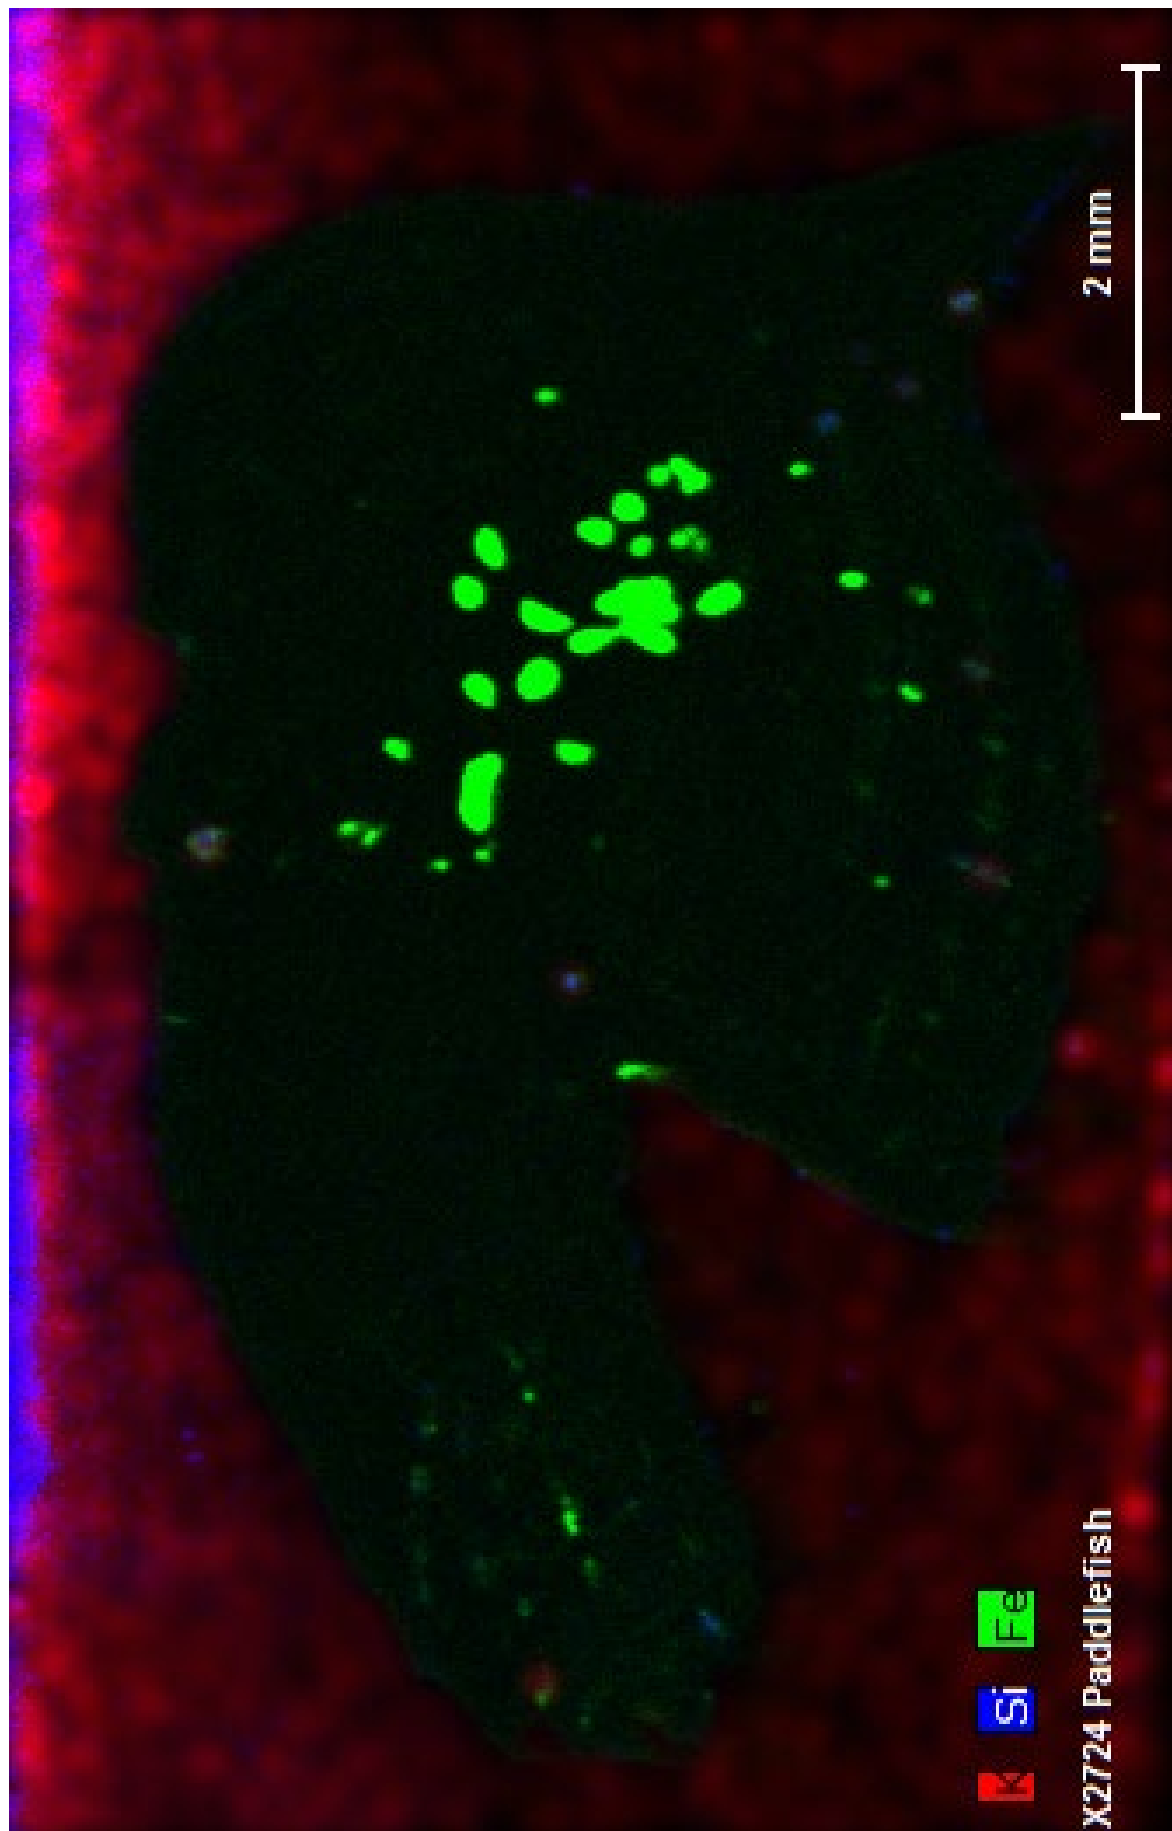

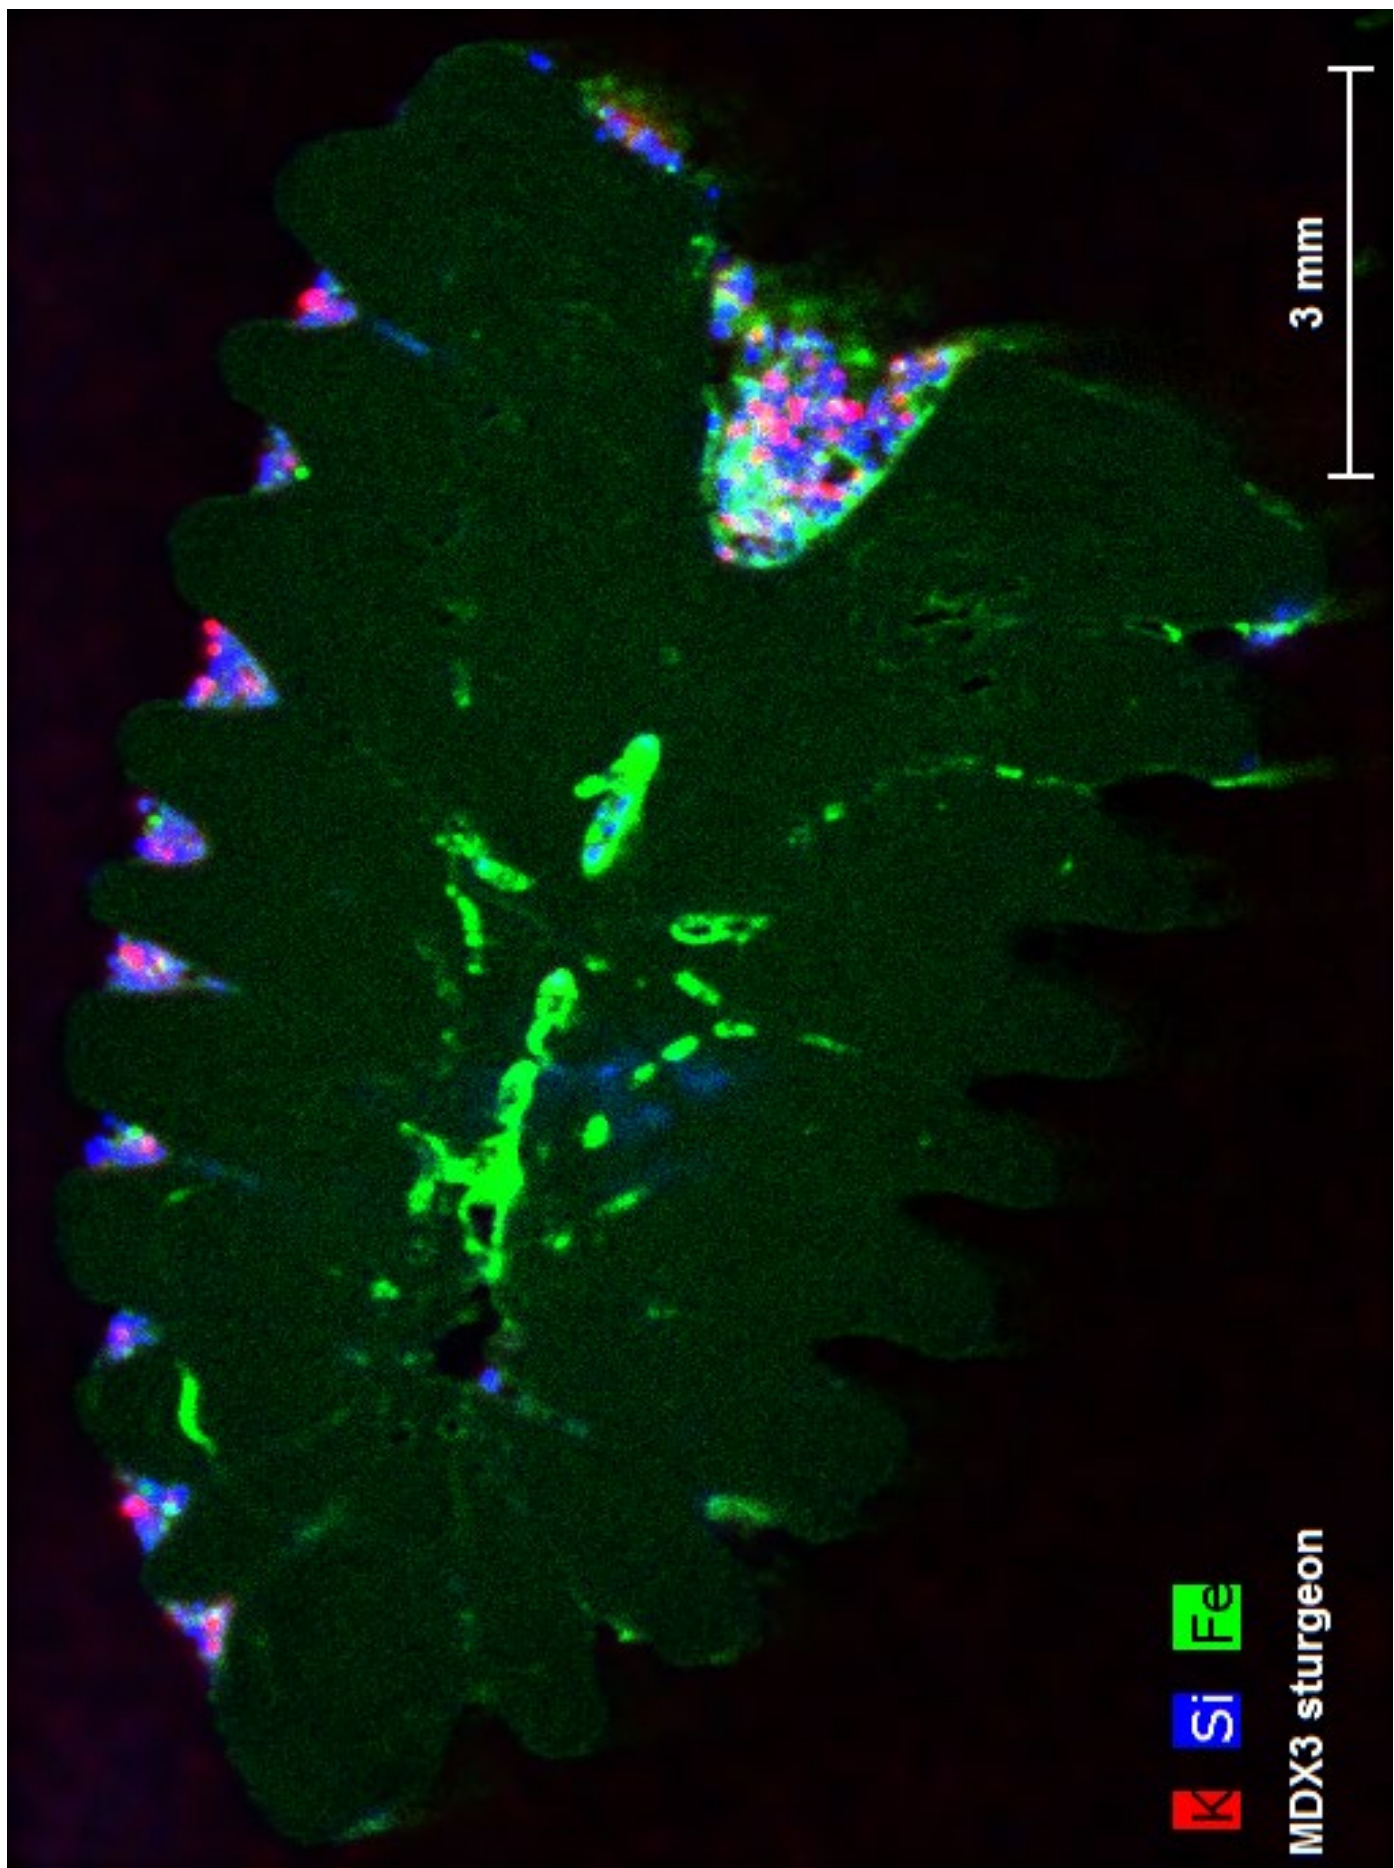

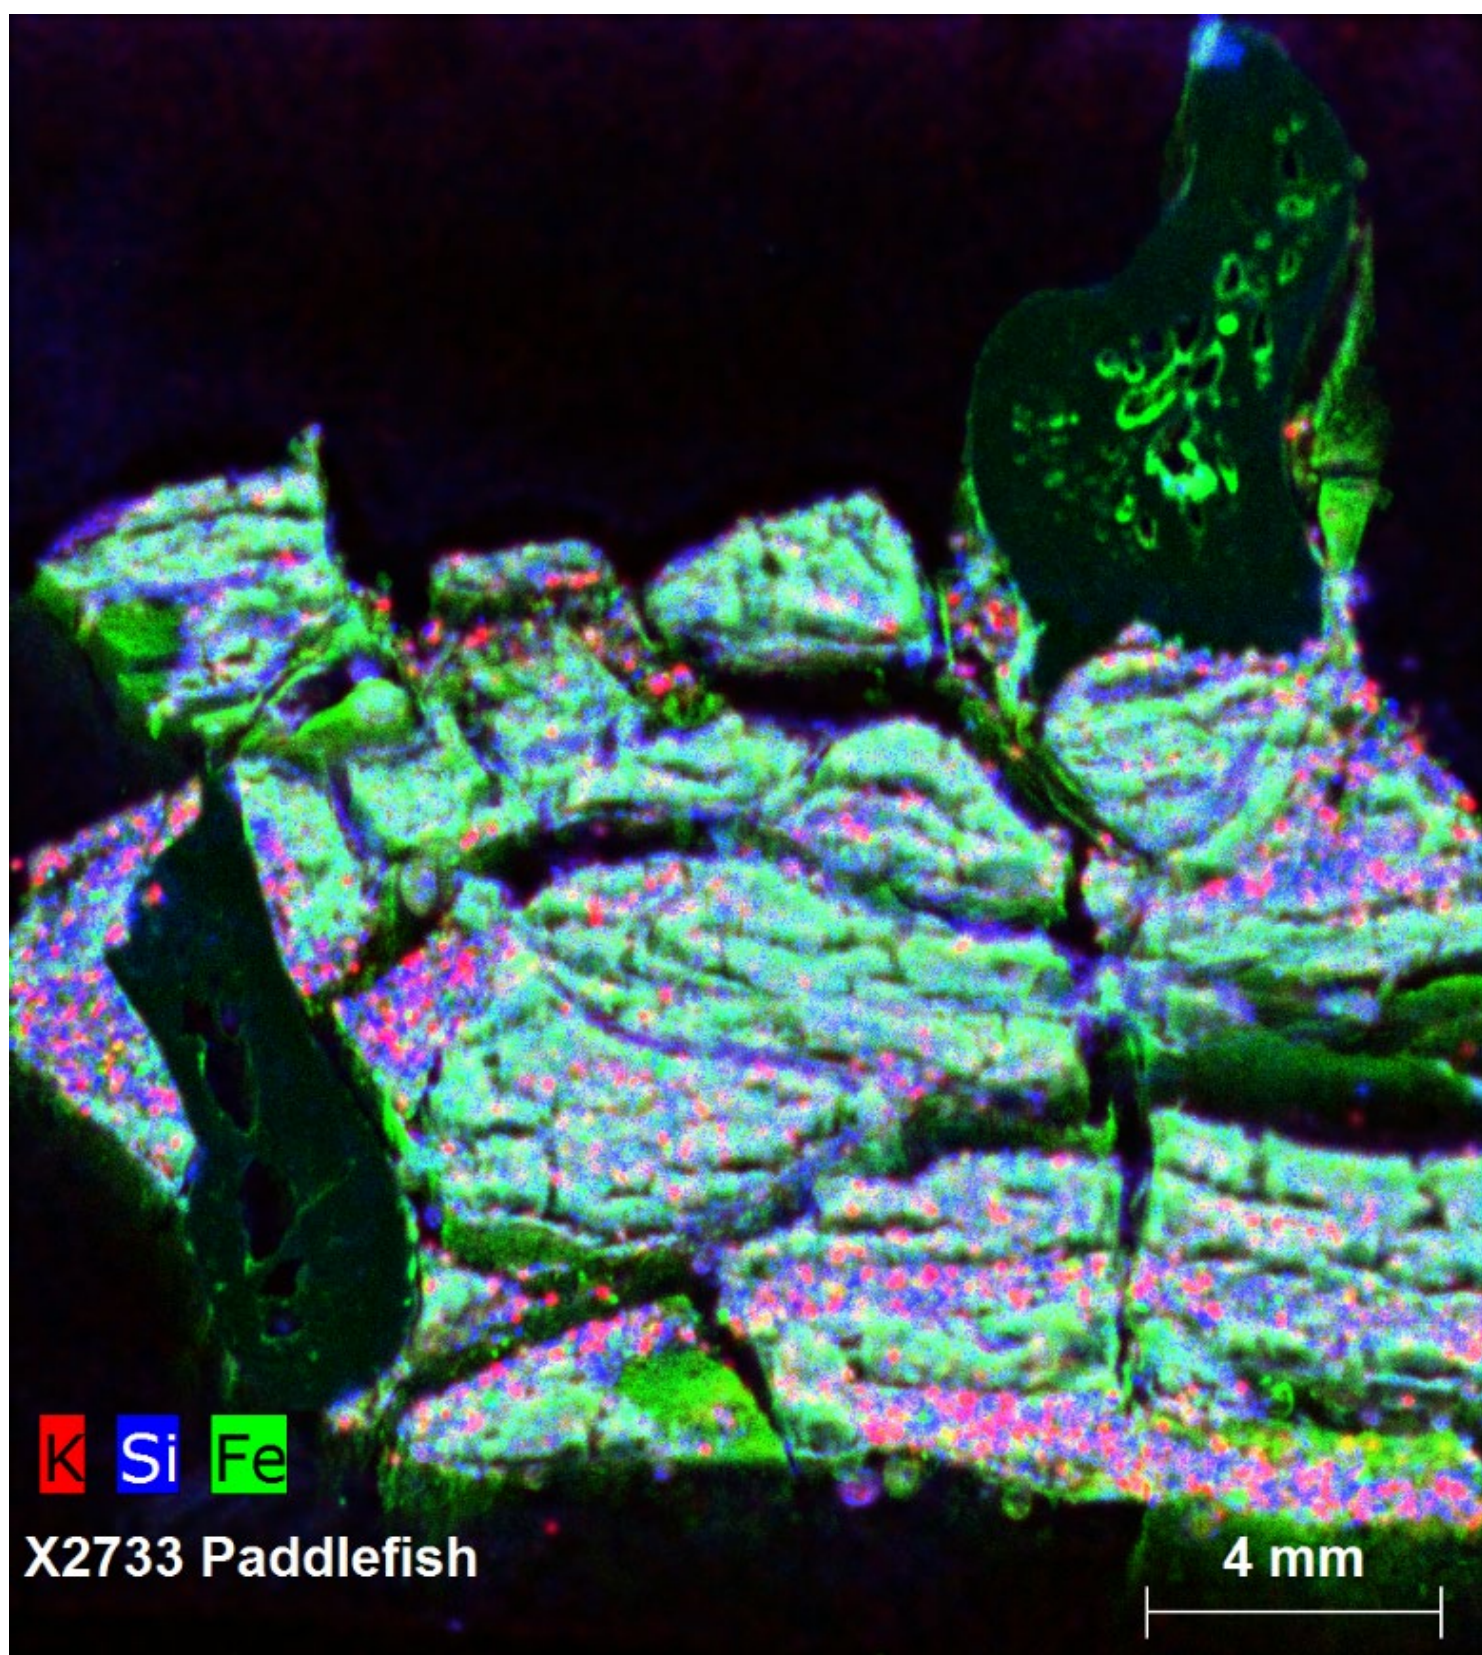

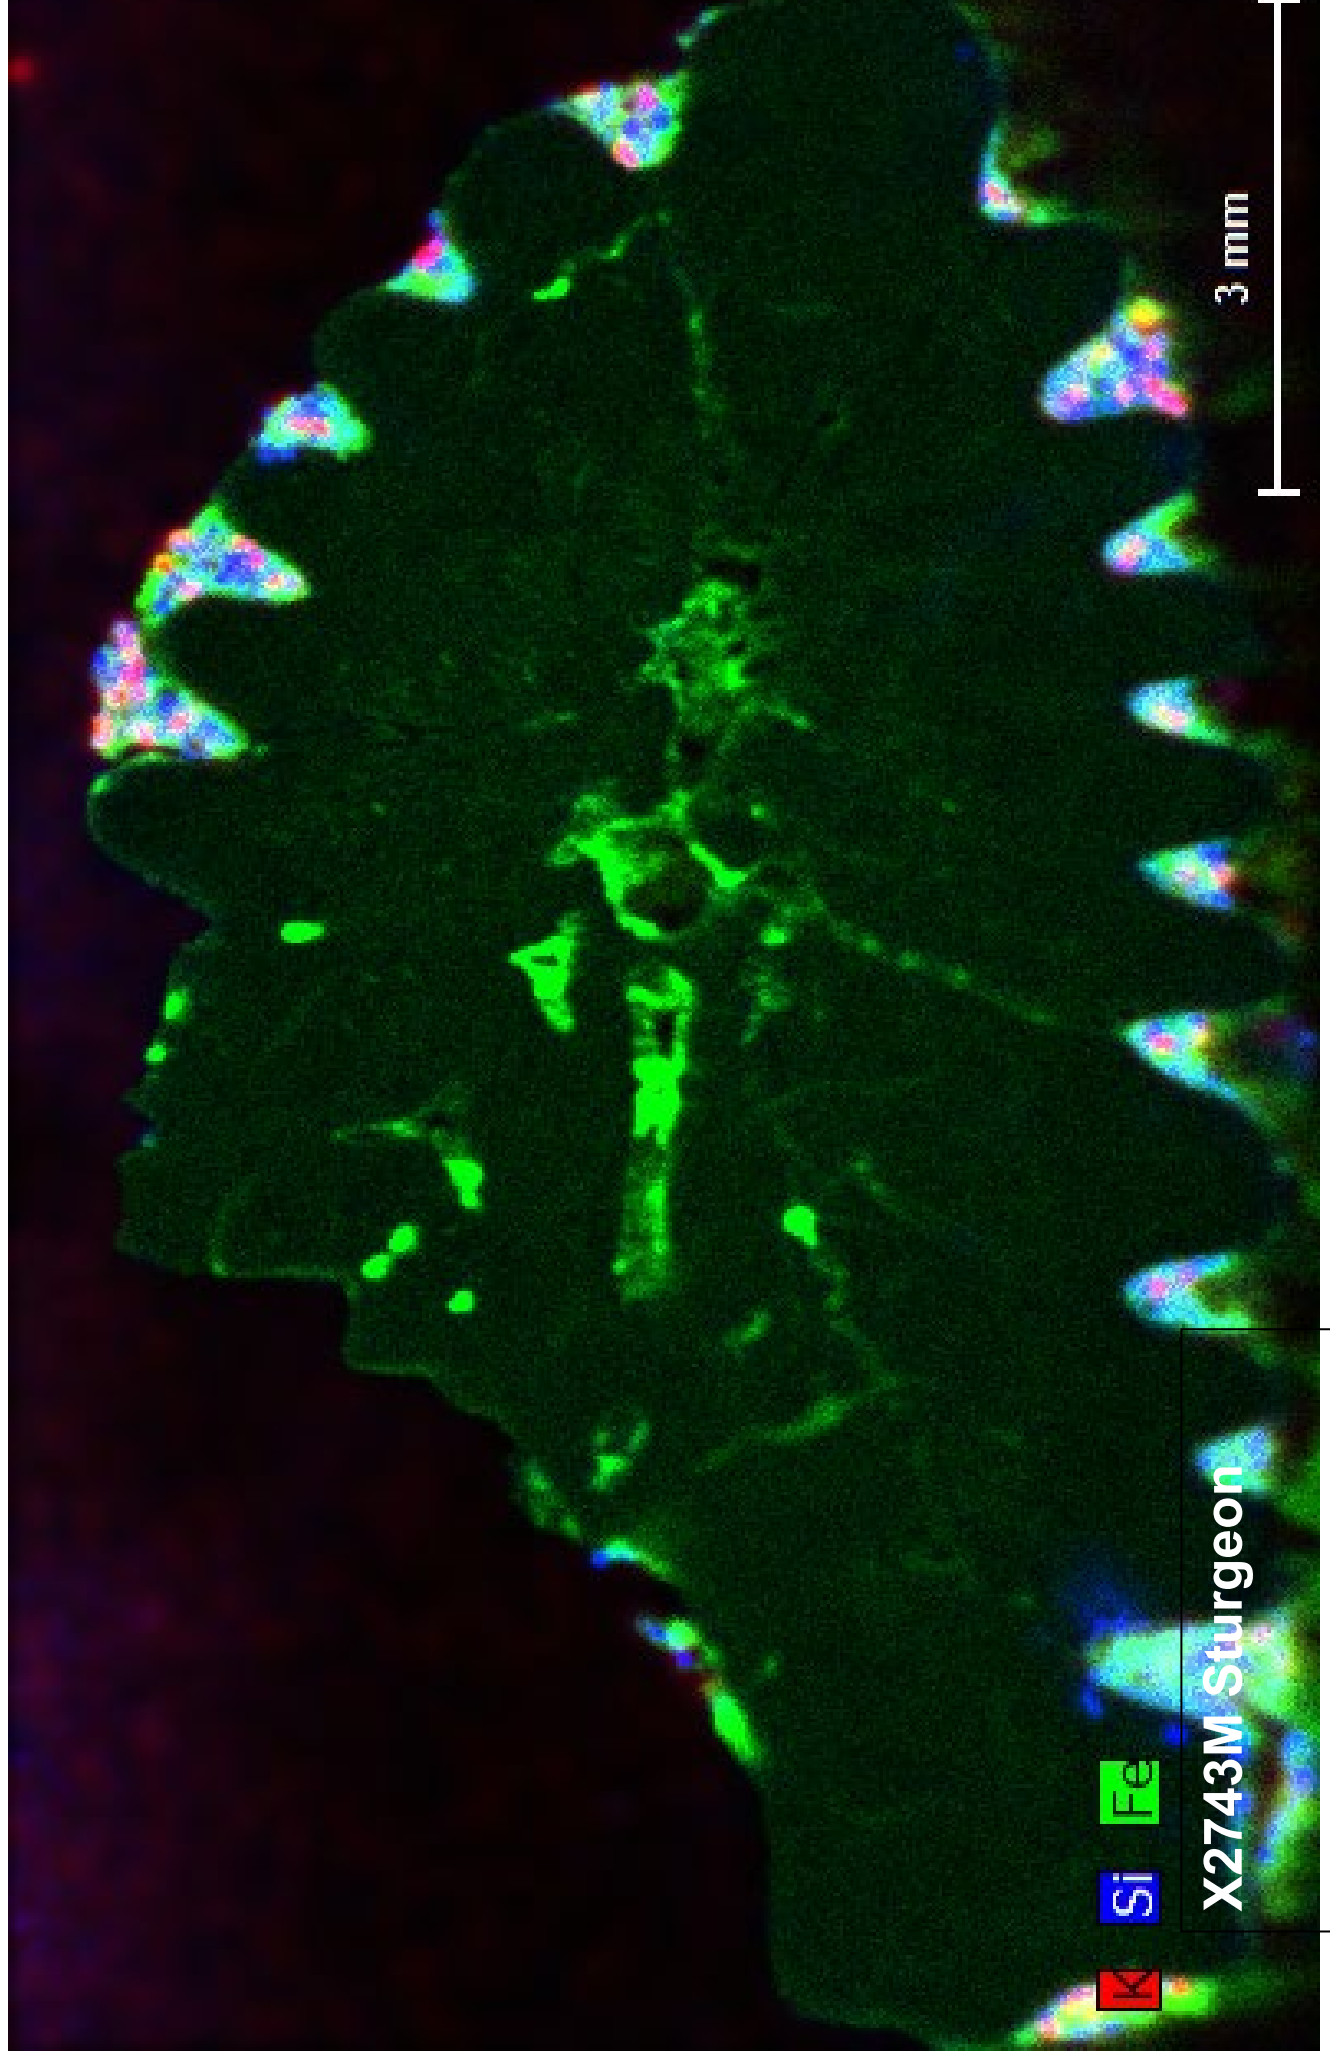

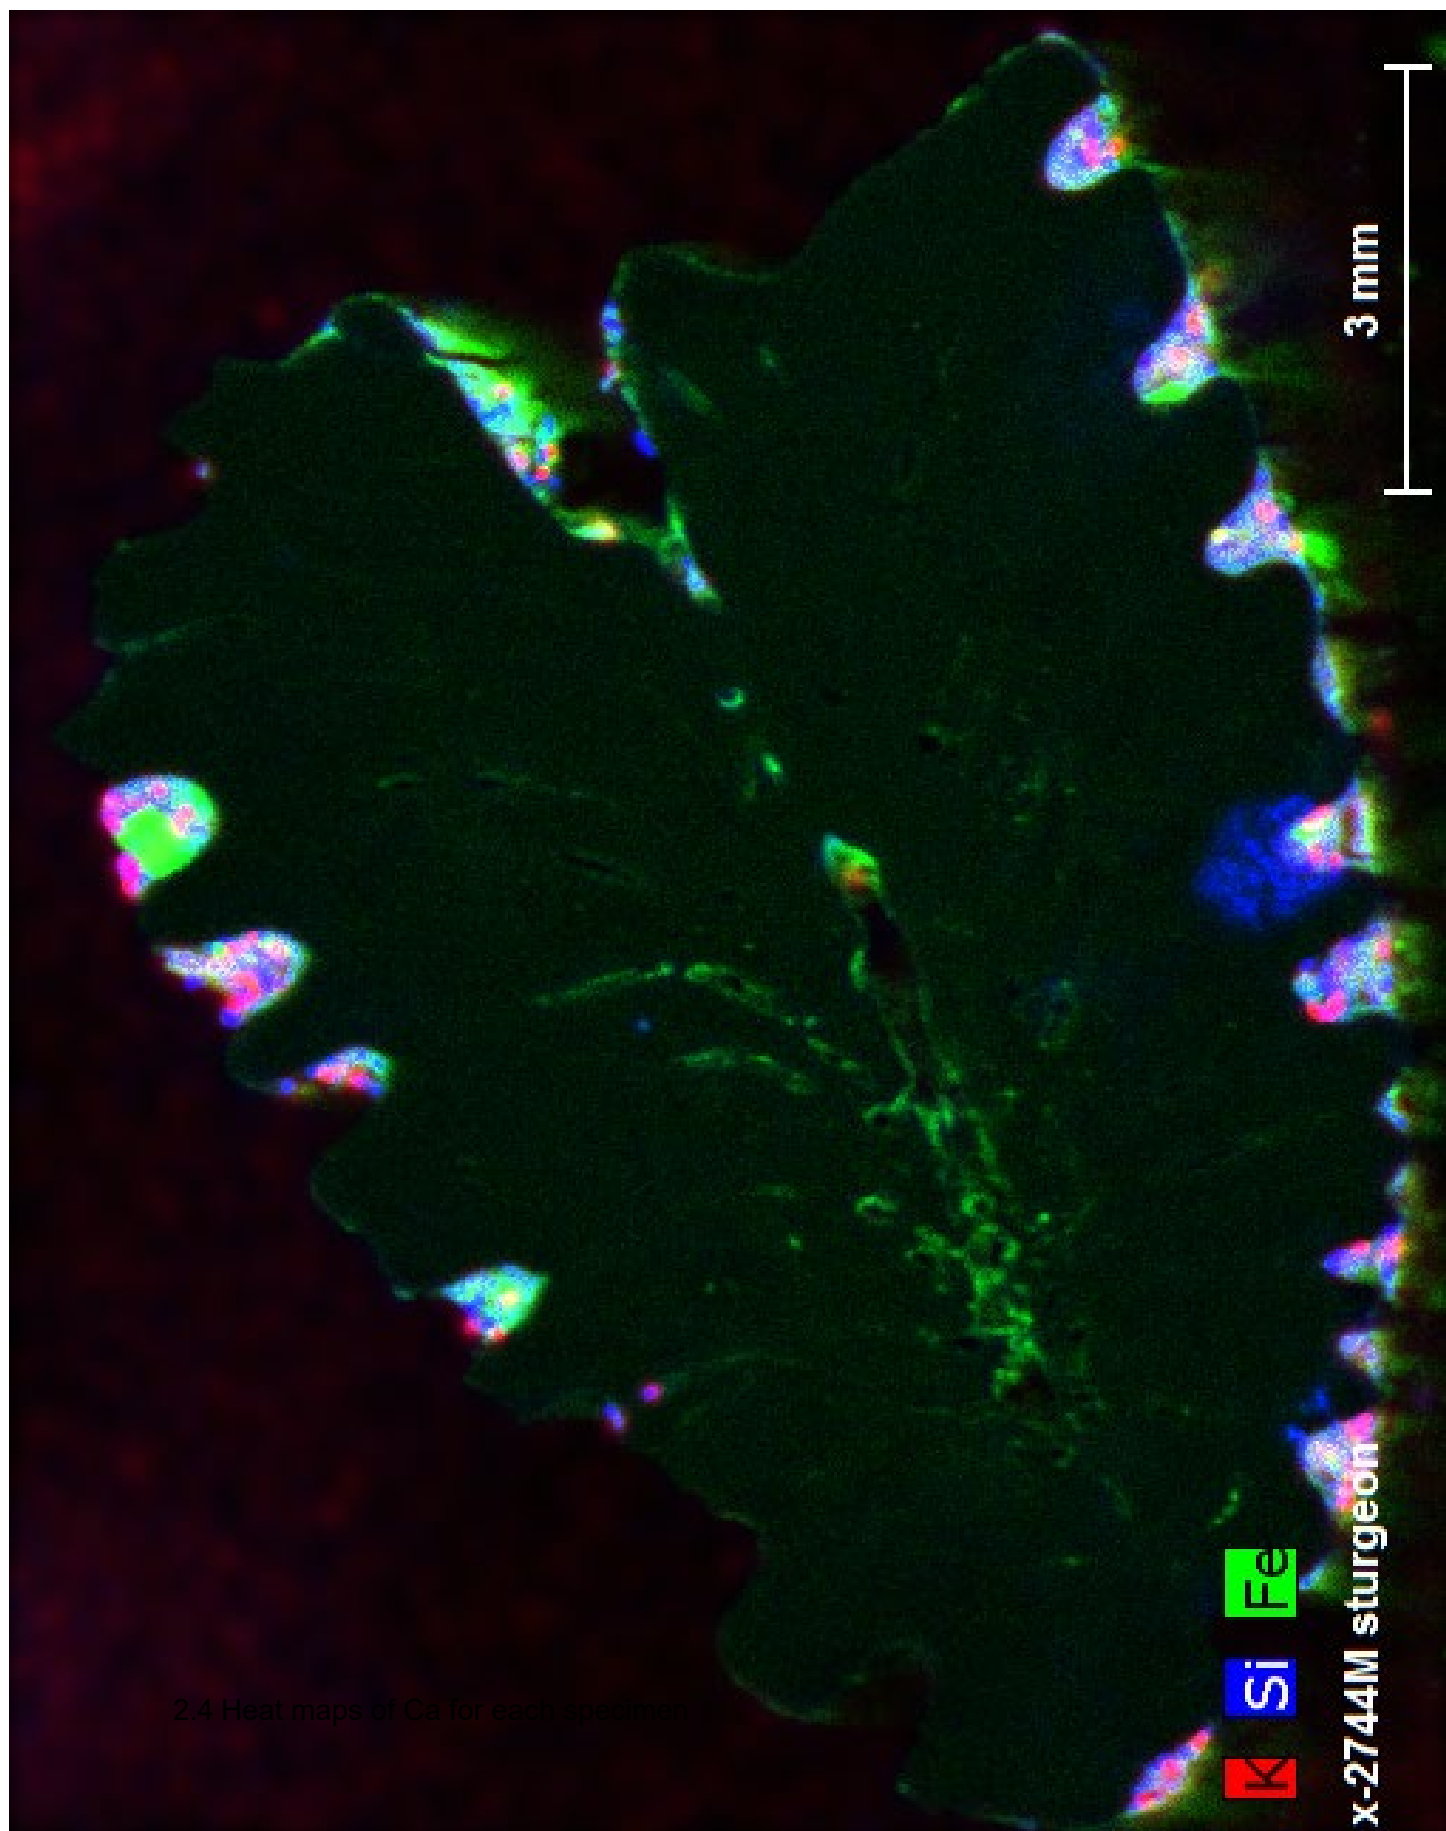

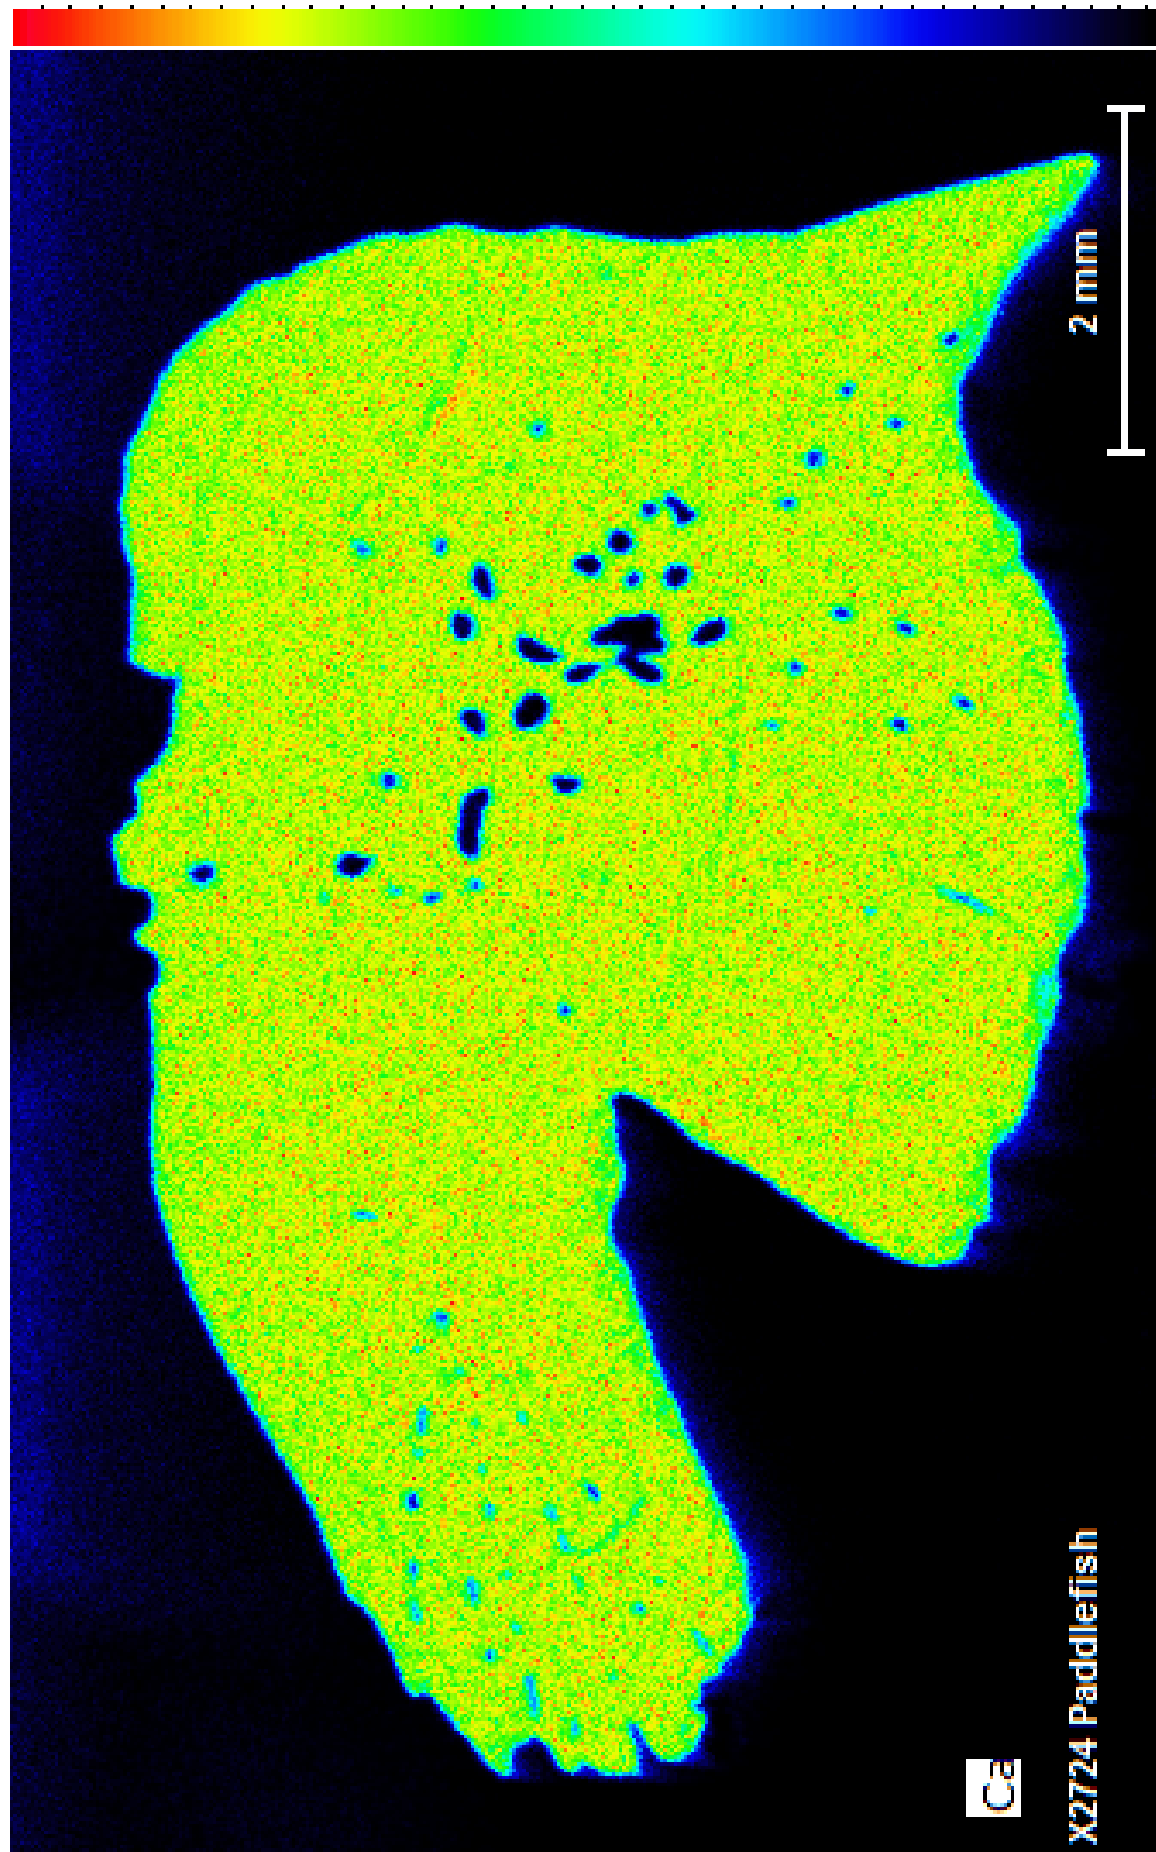

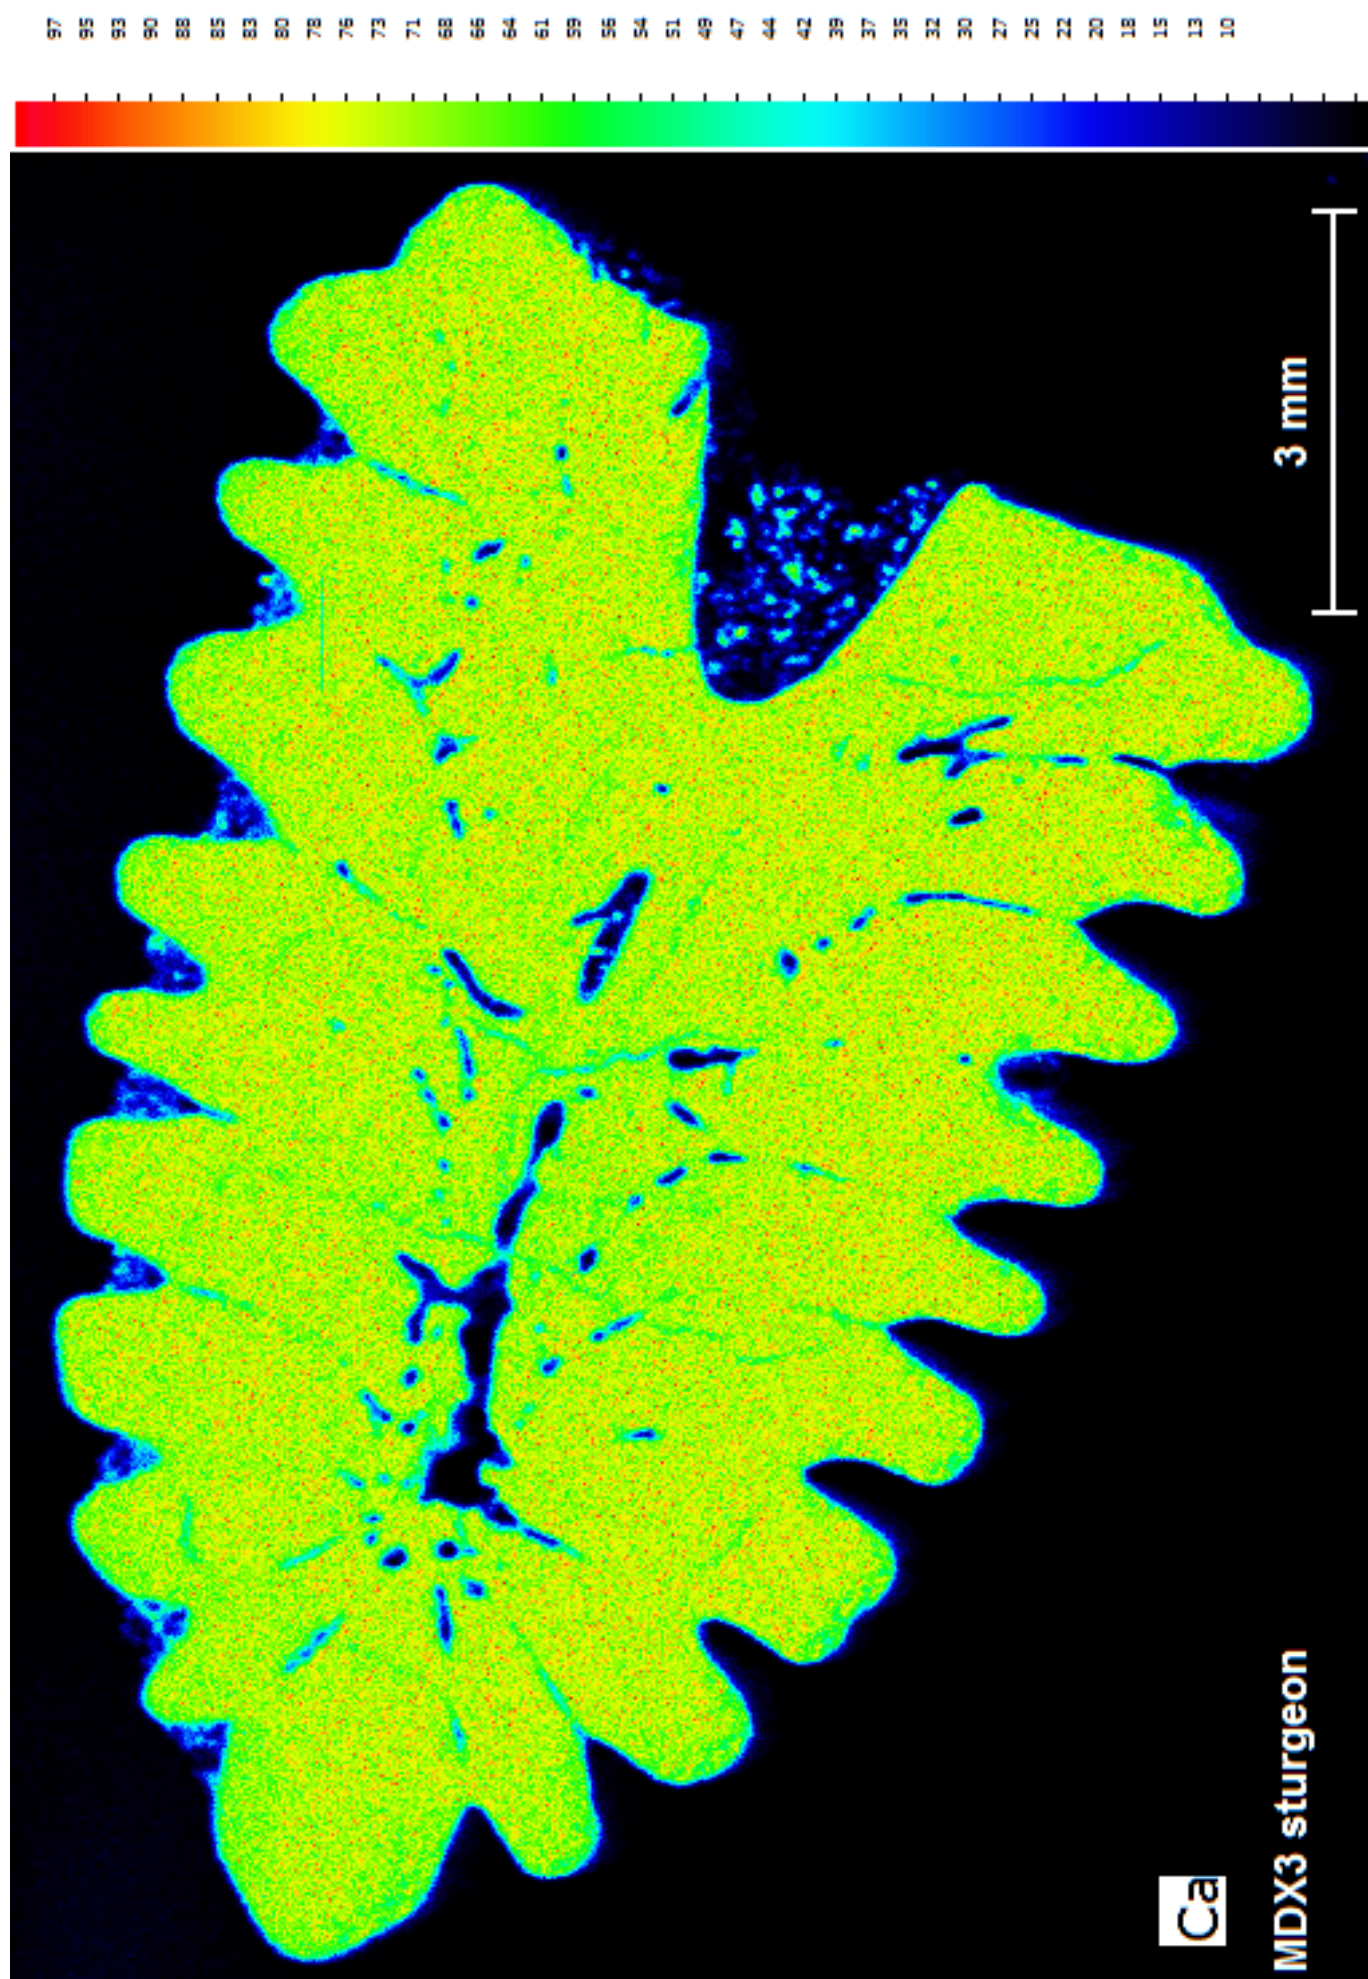

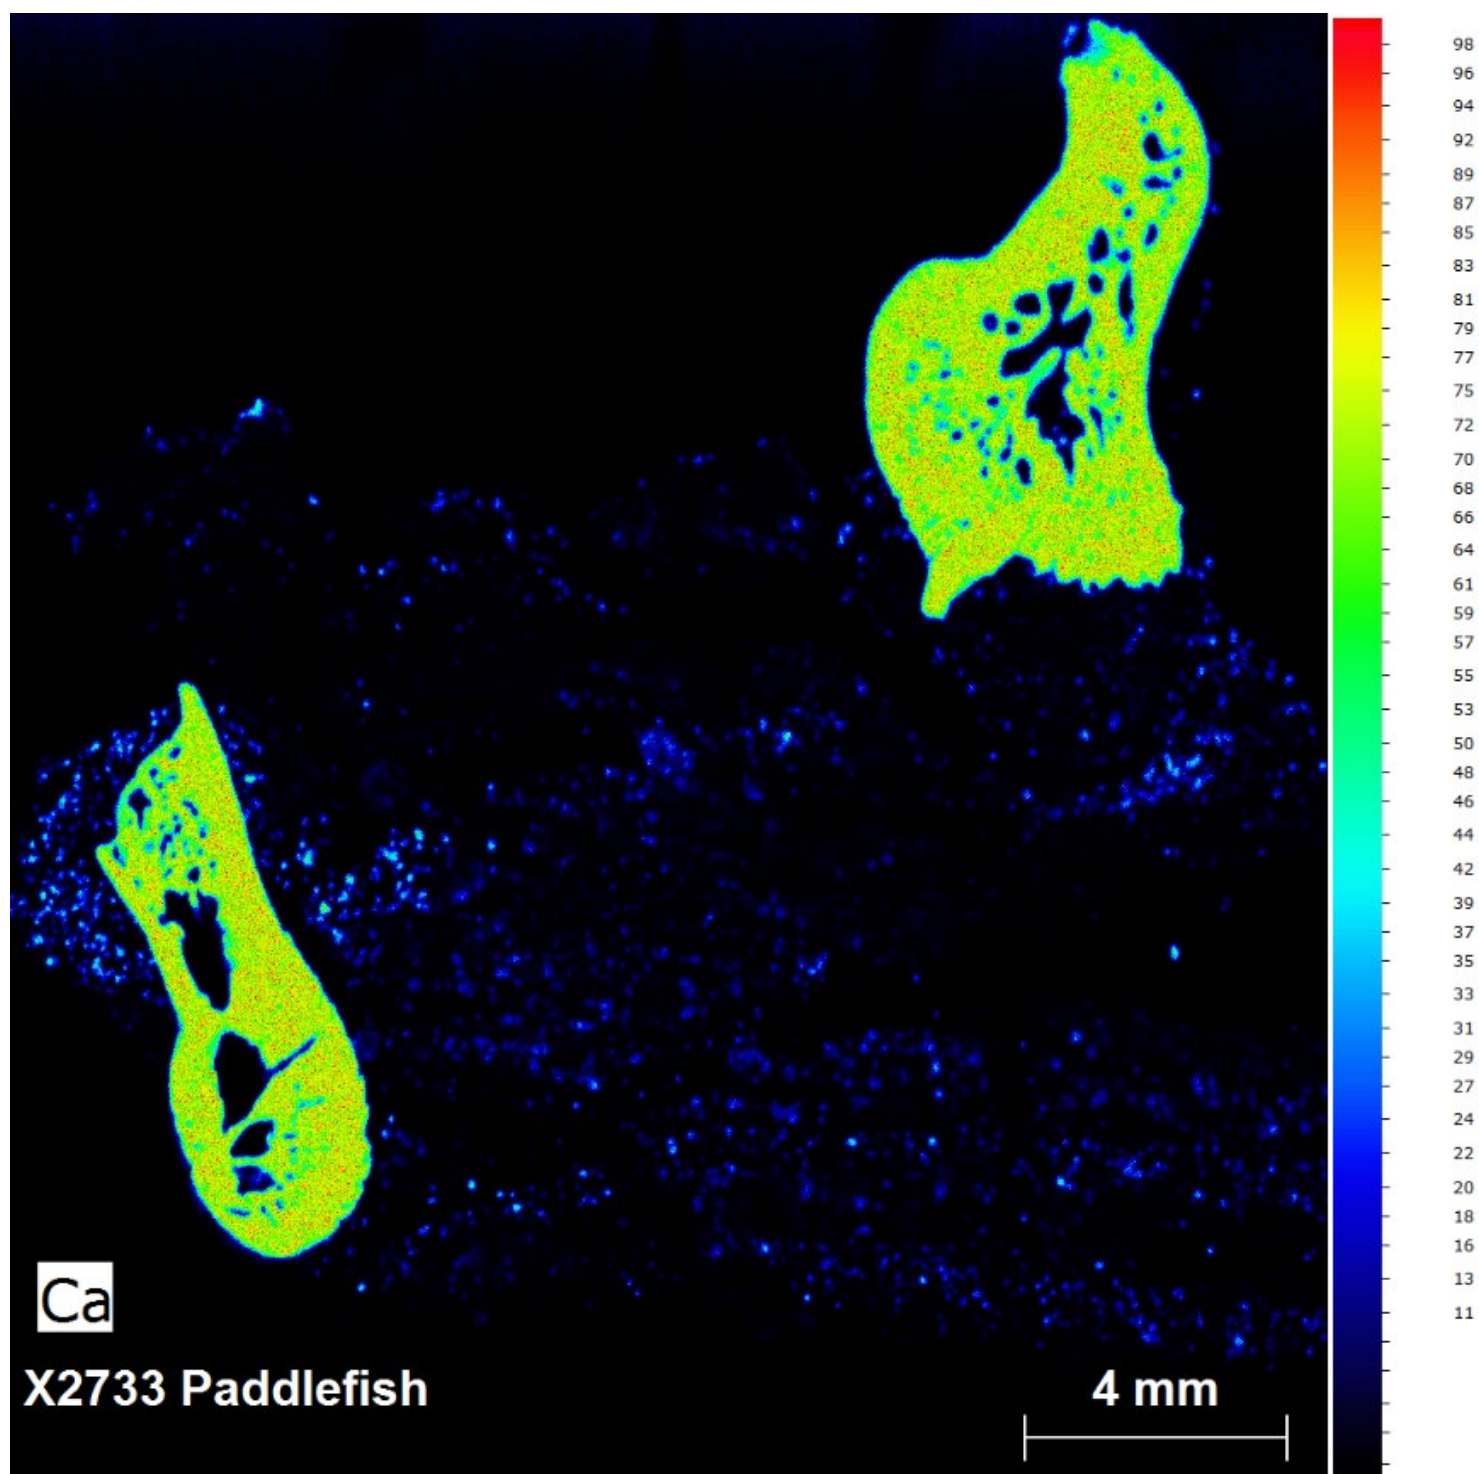

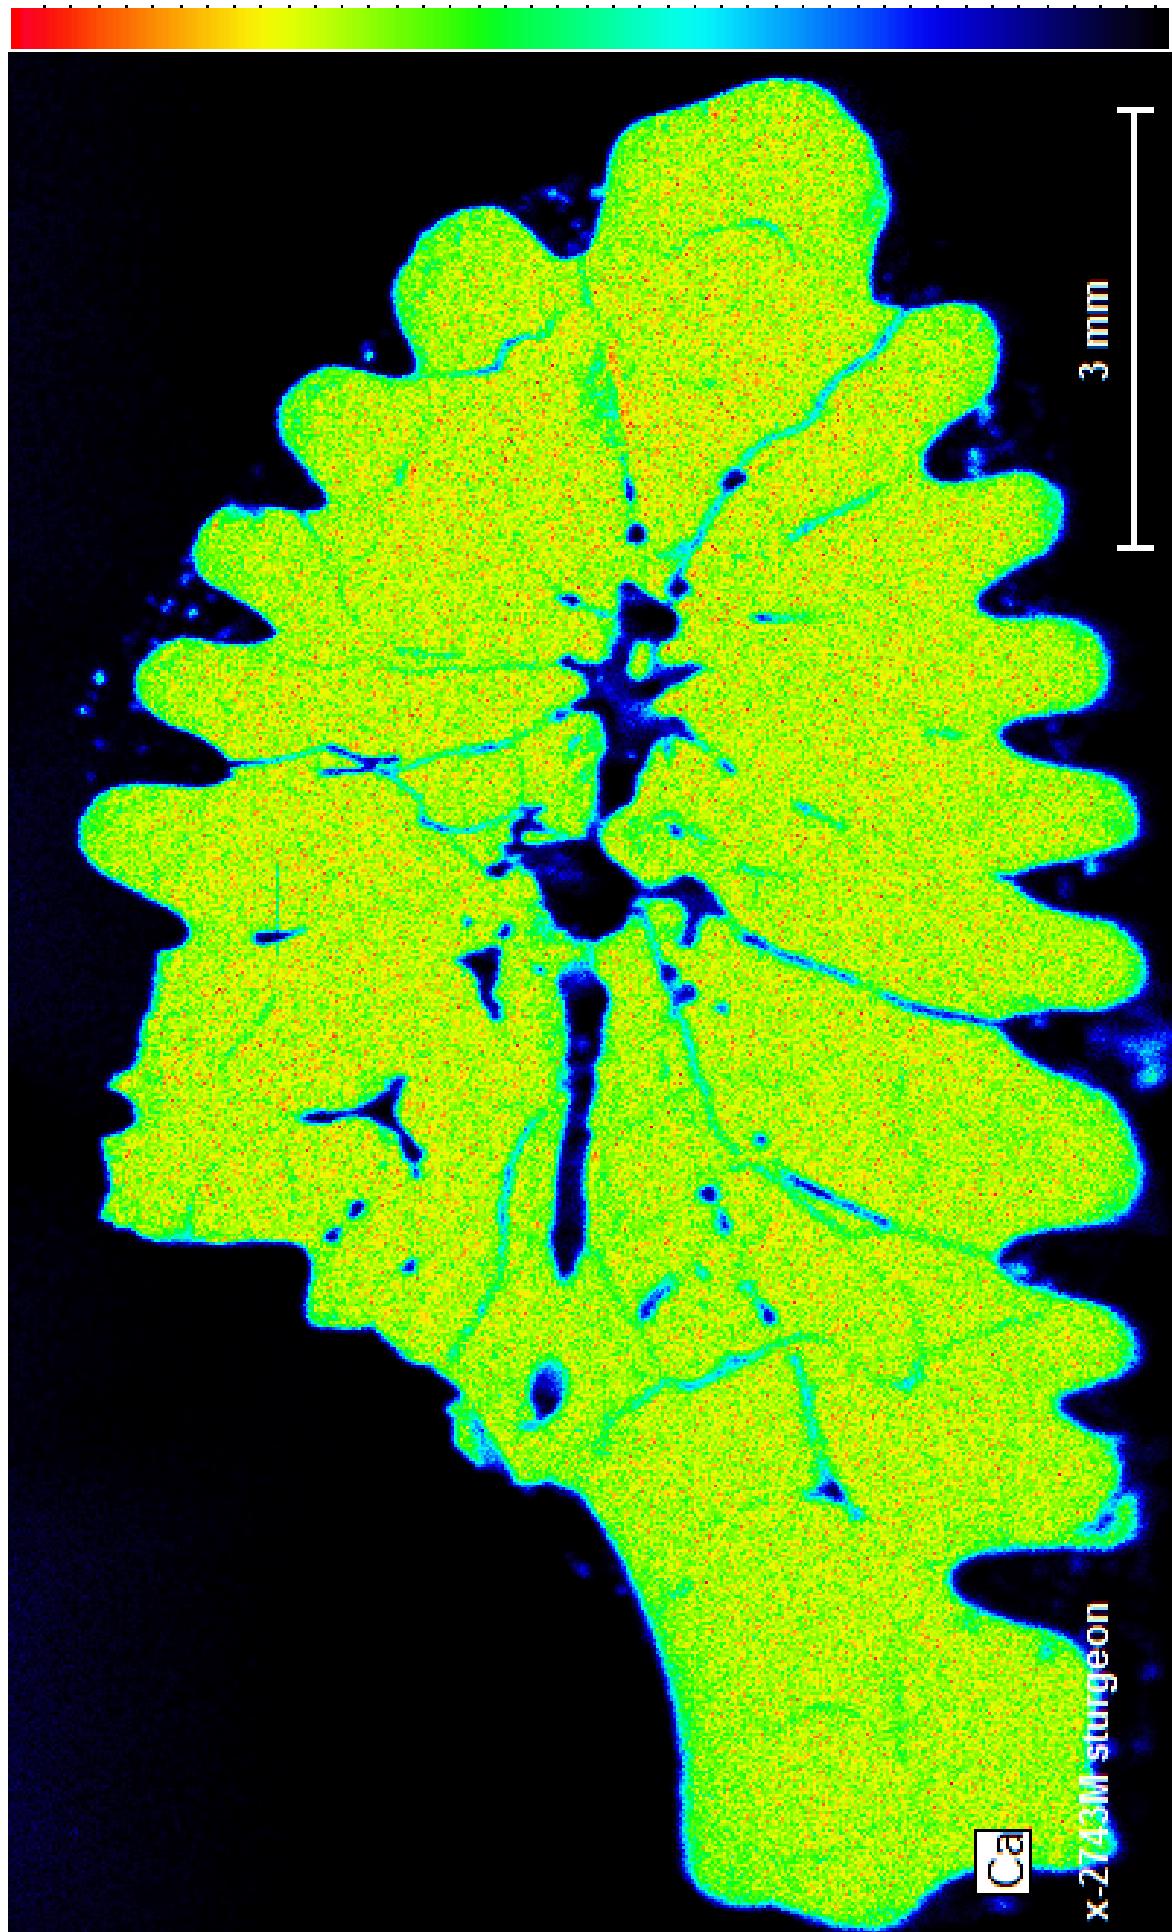

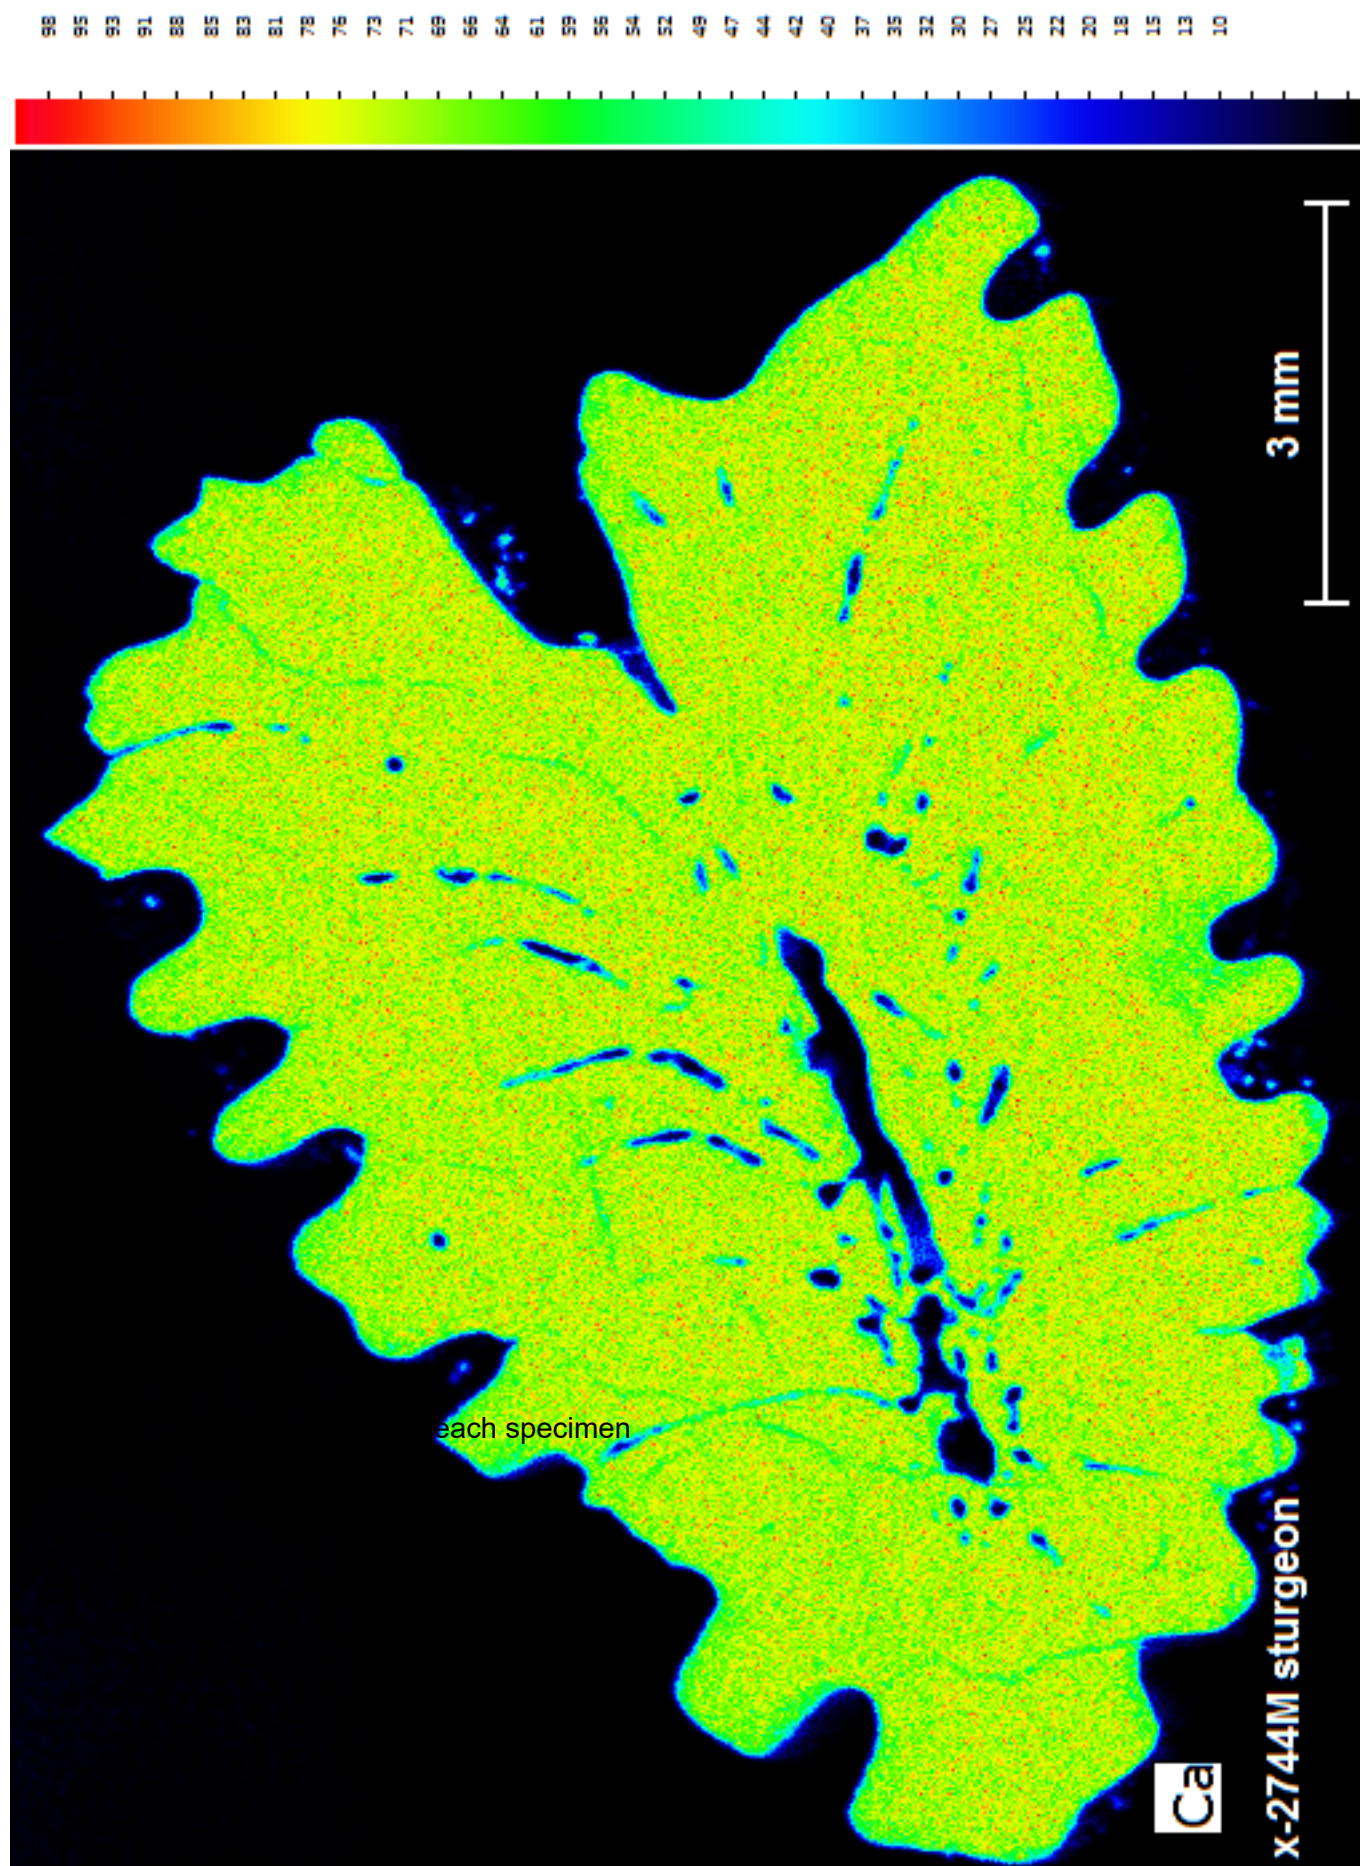

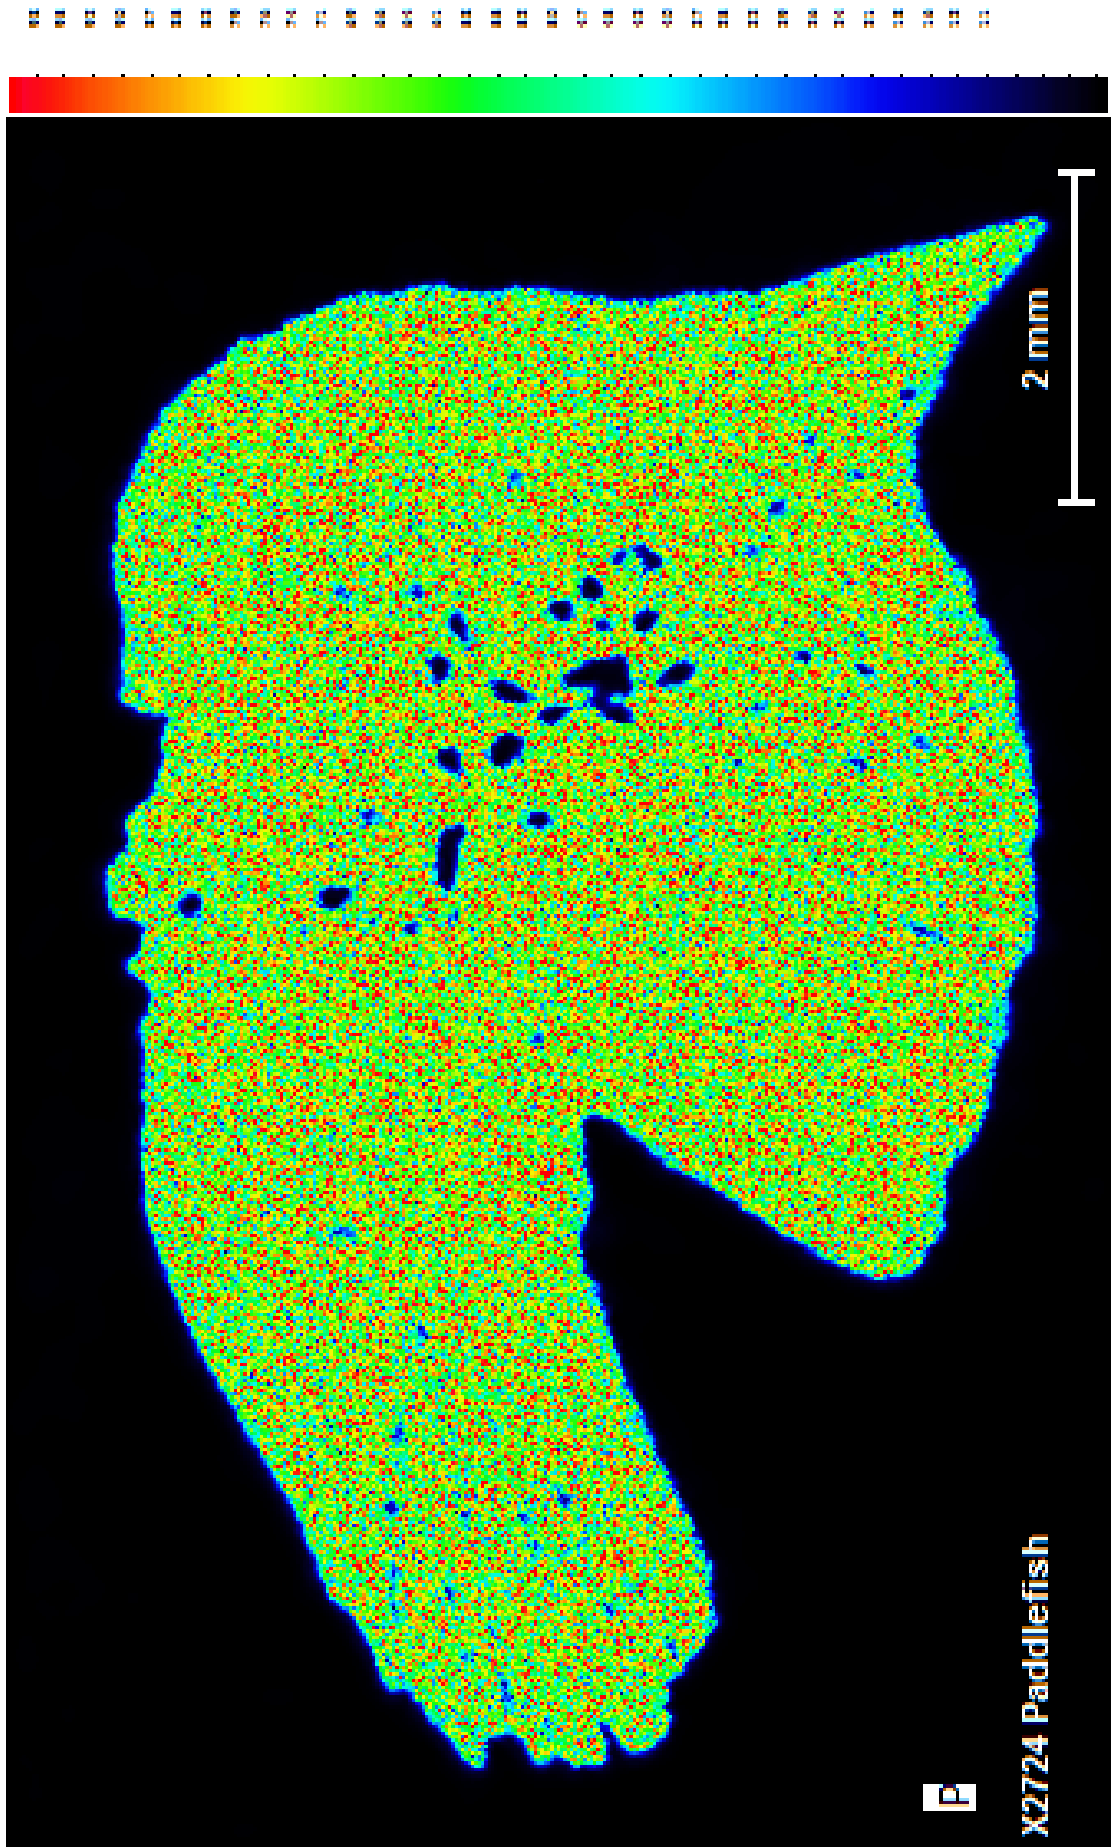

**P**

MDX3 sturgeon

3 mm

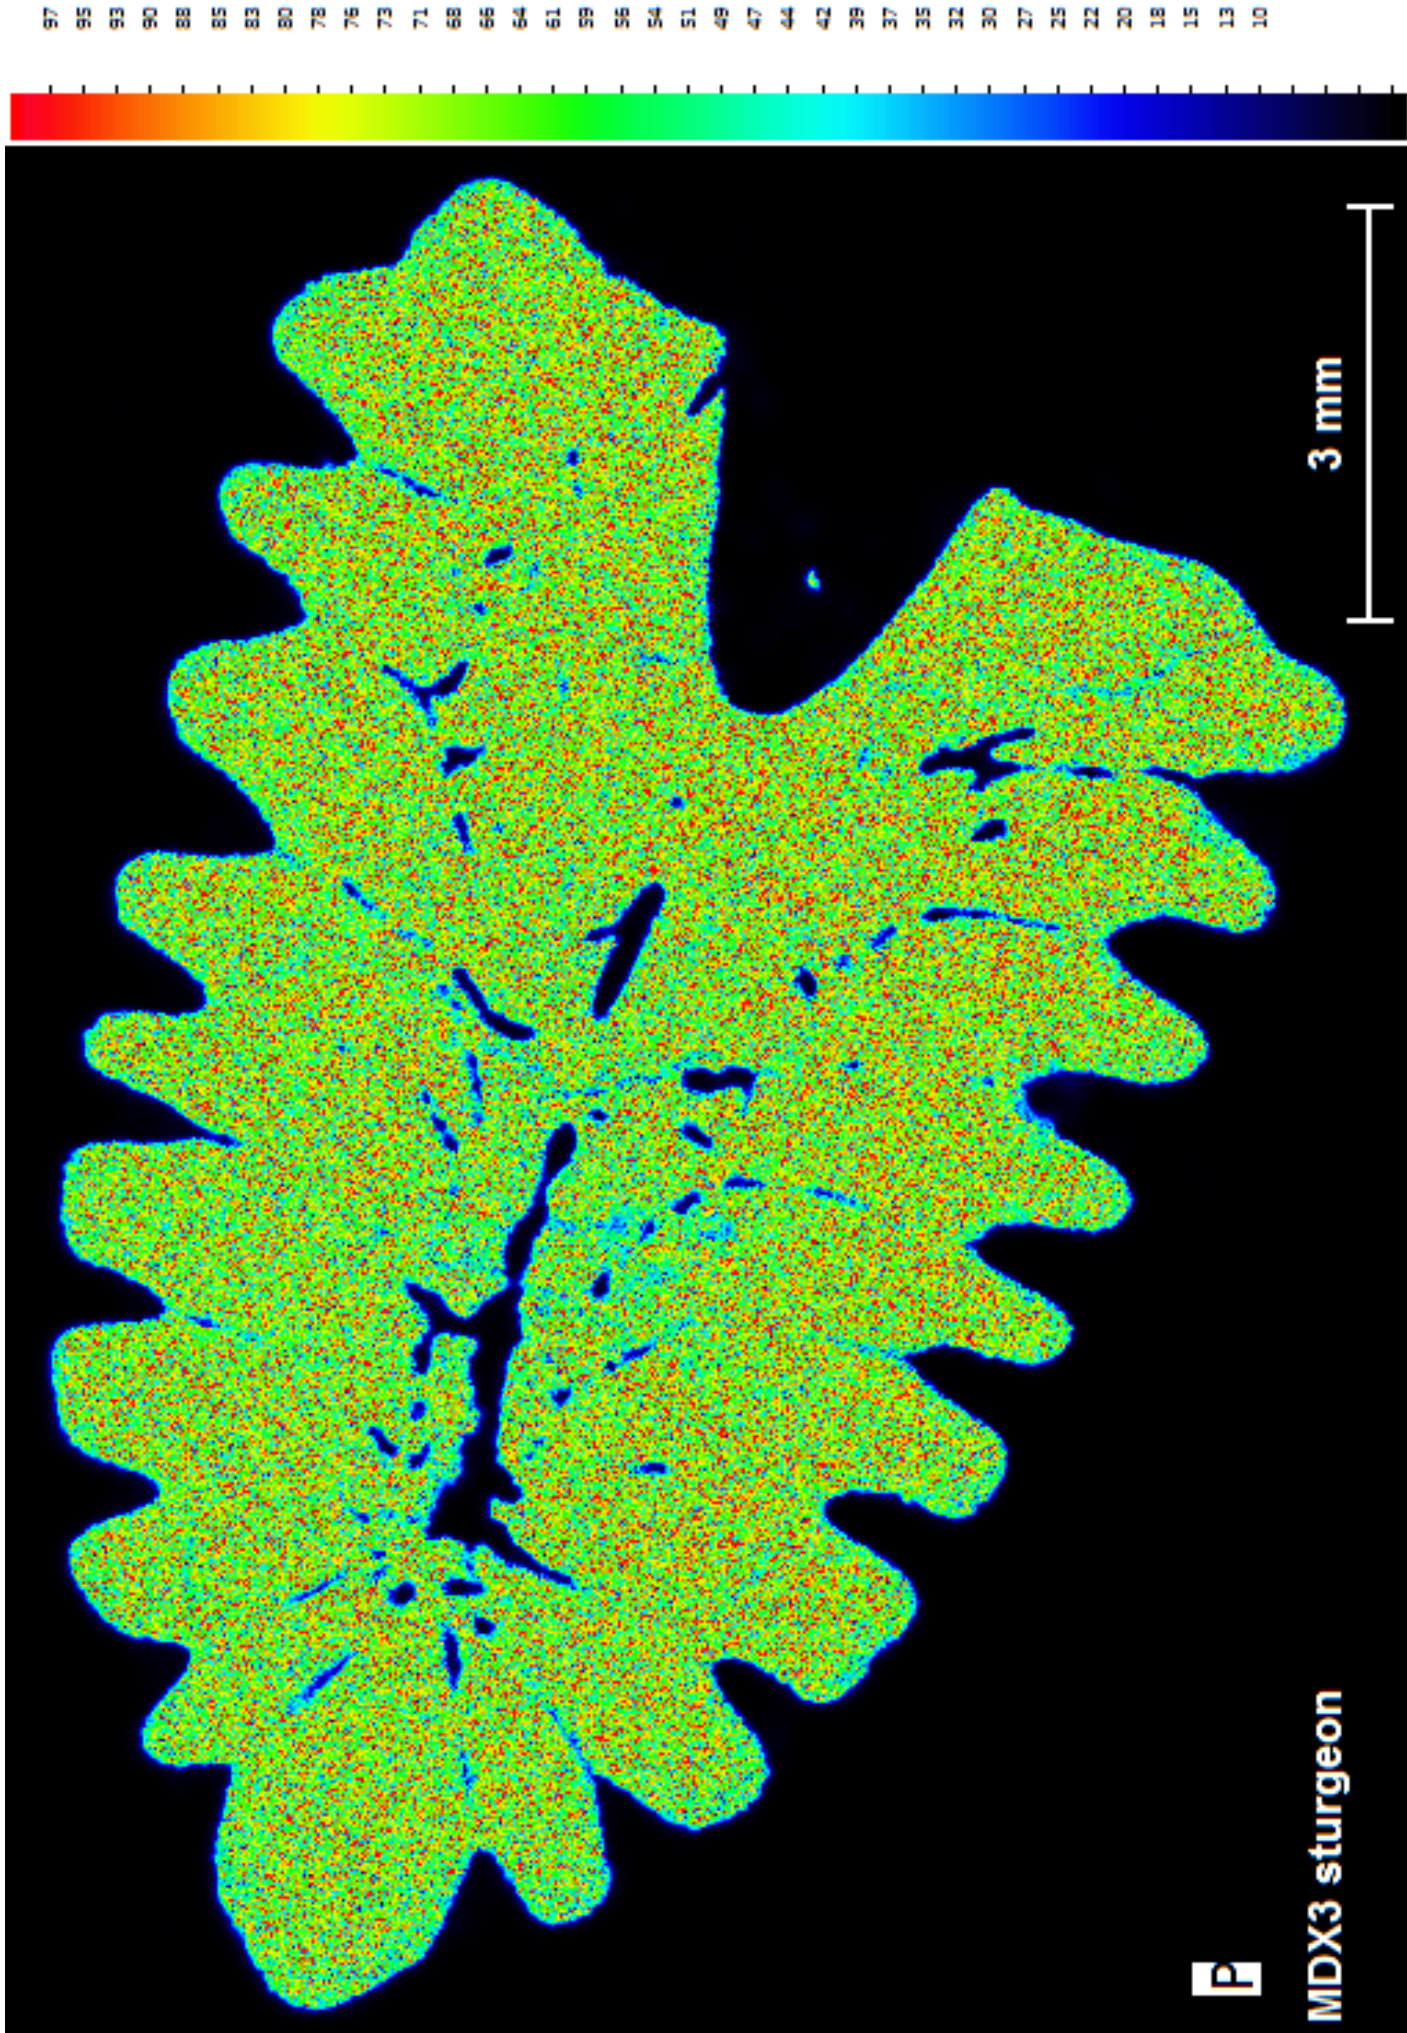

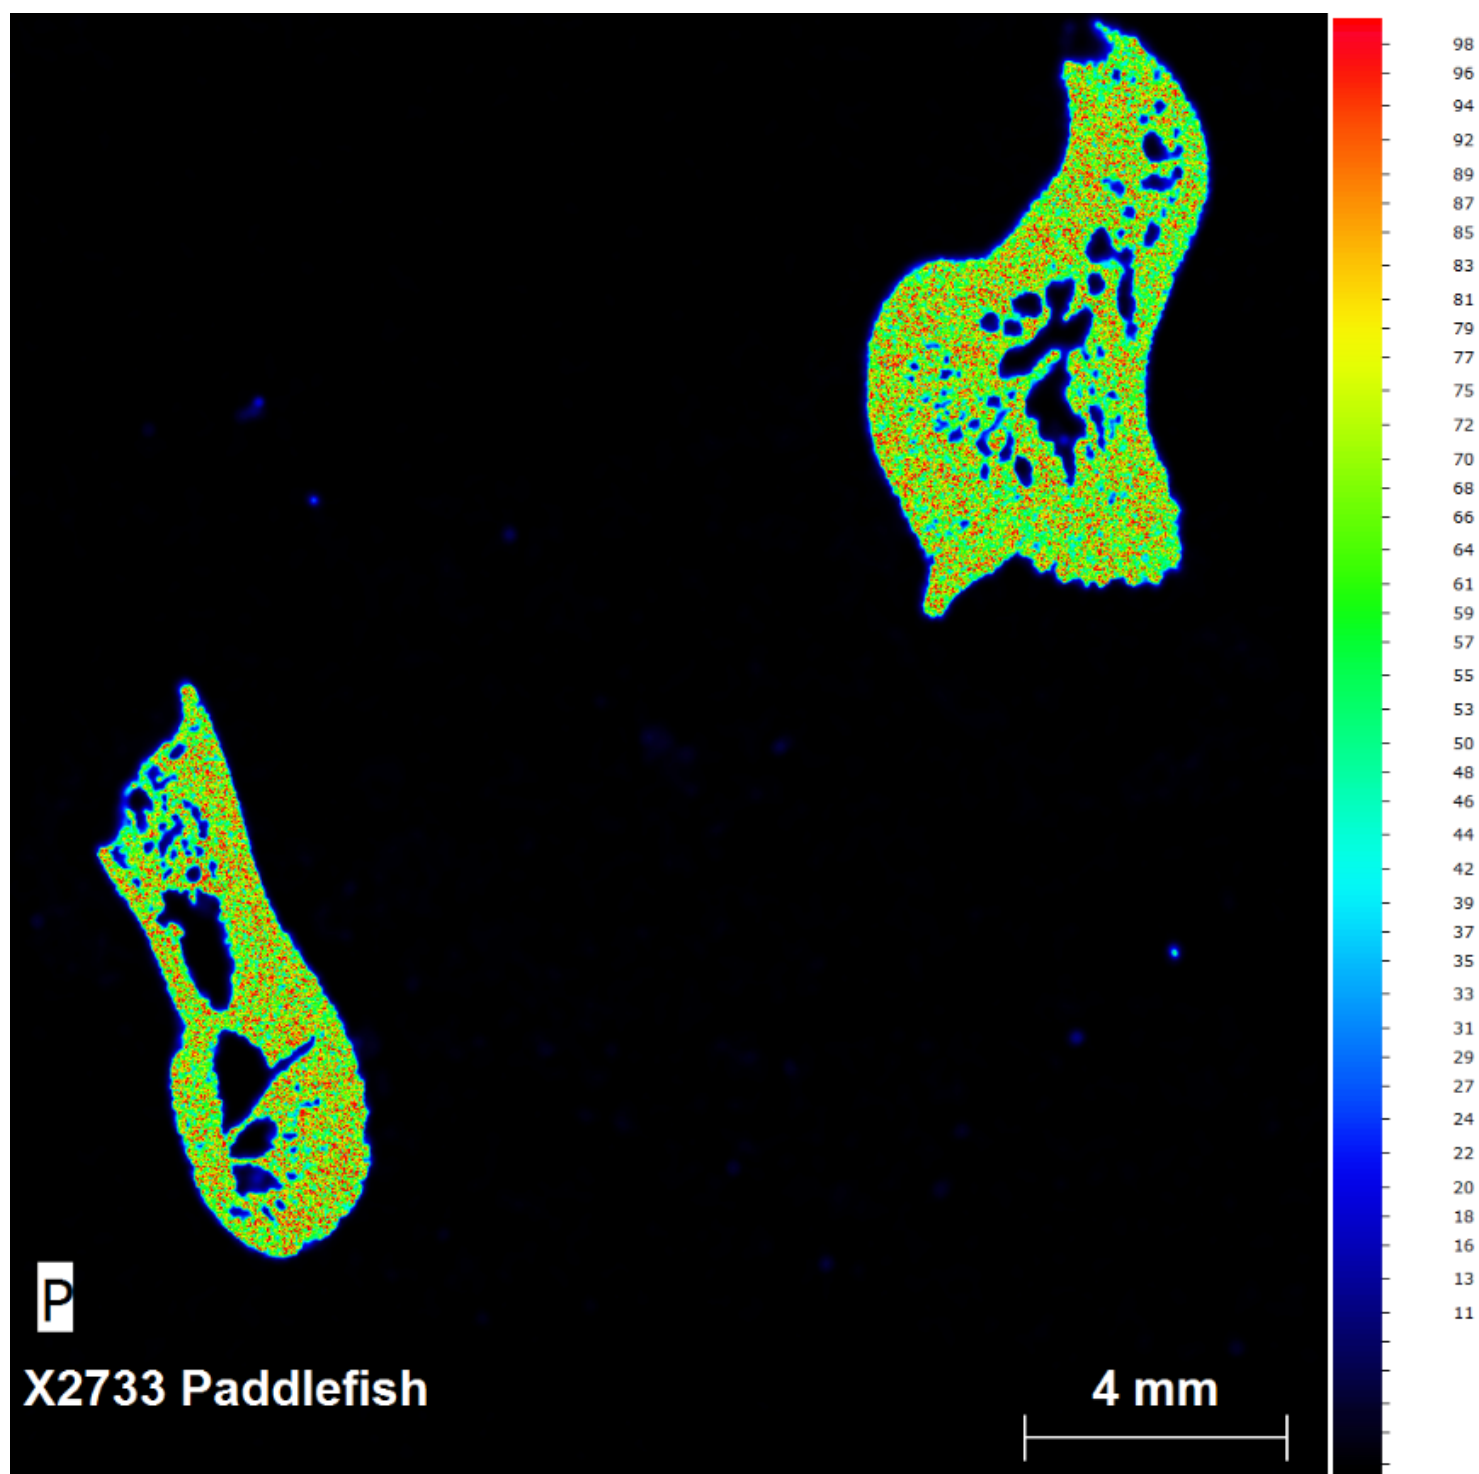

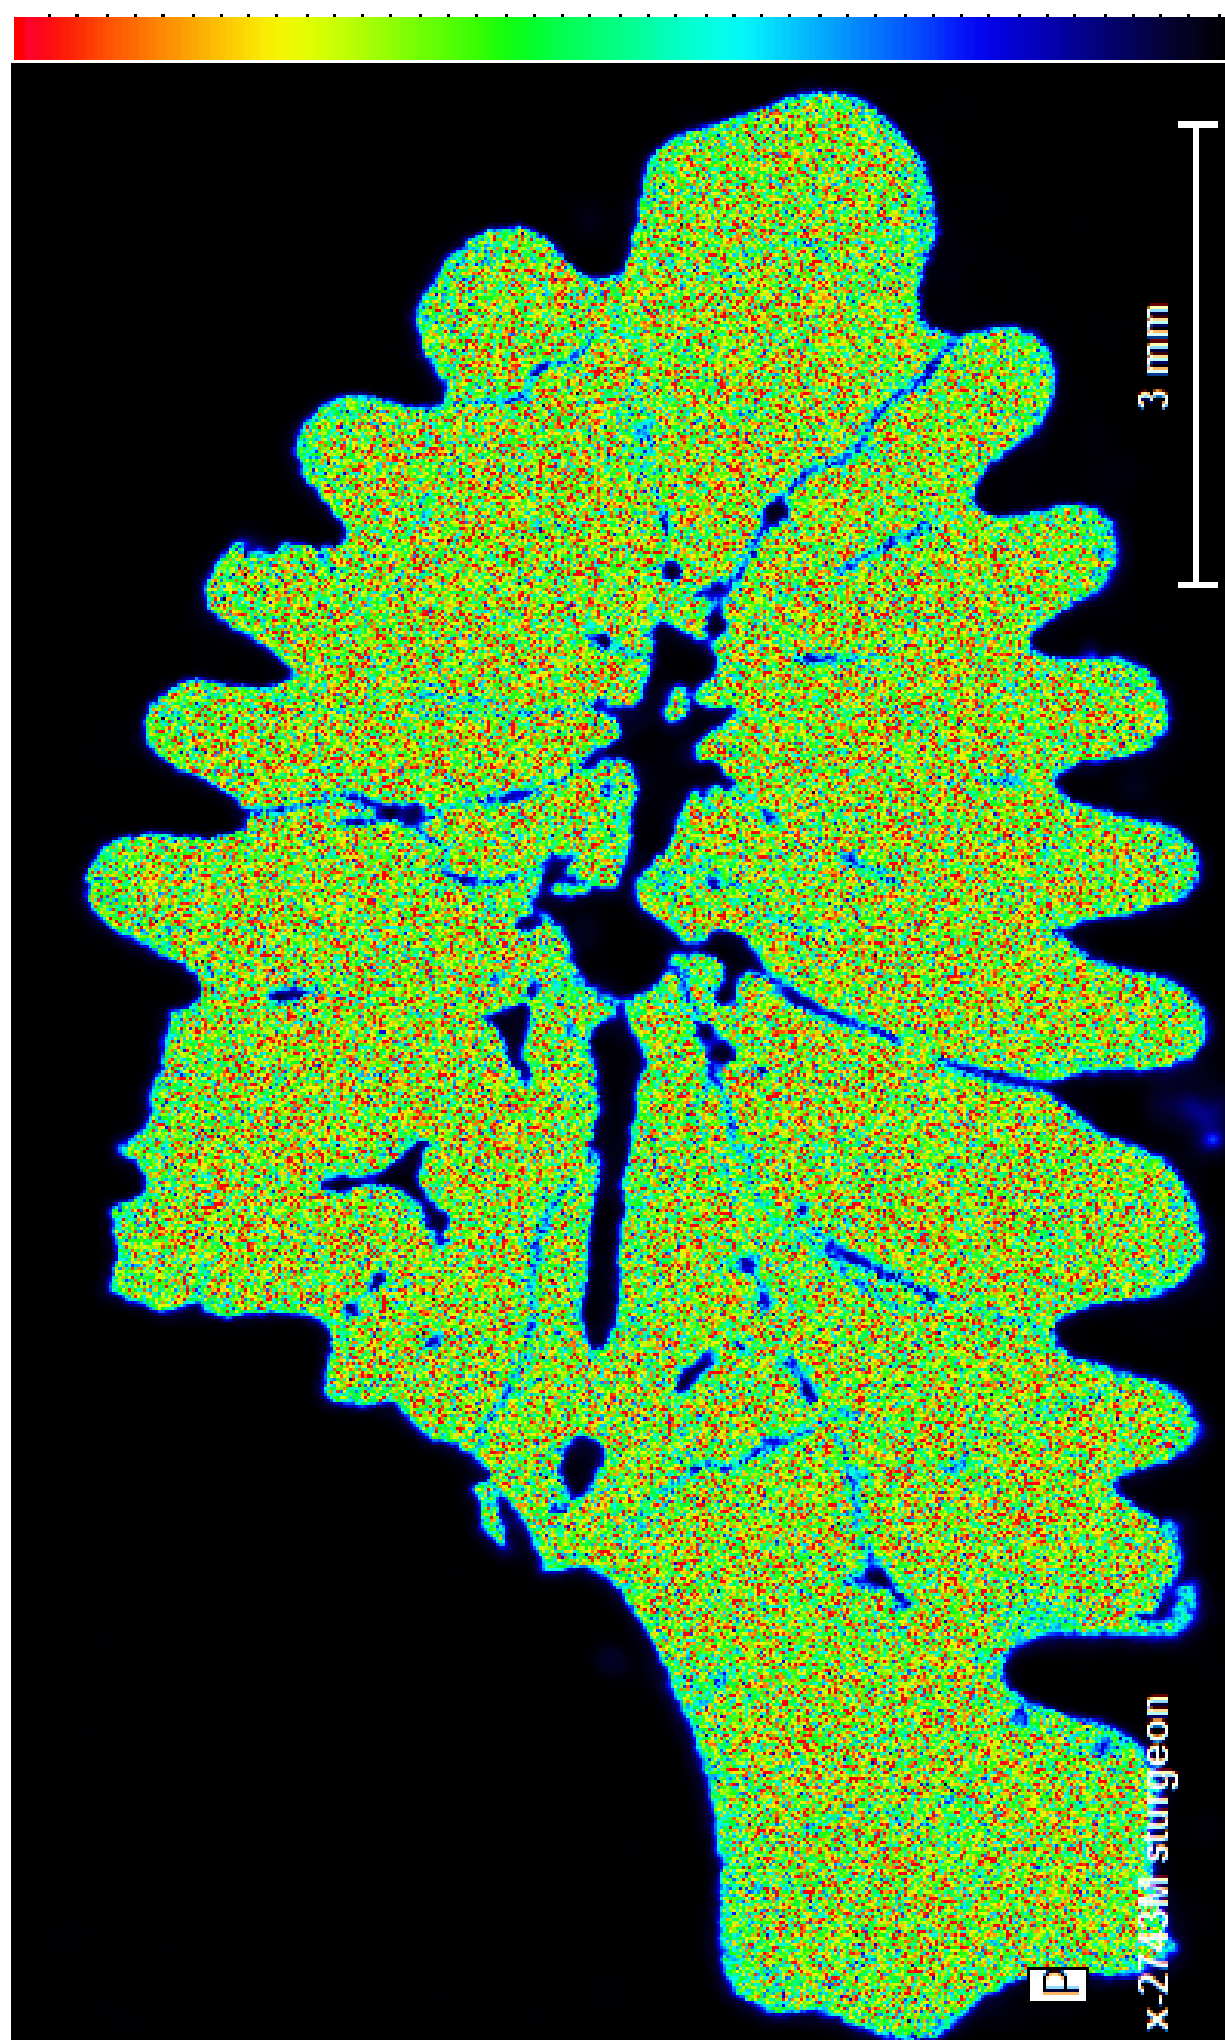

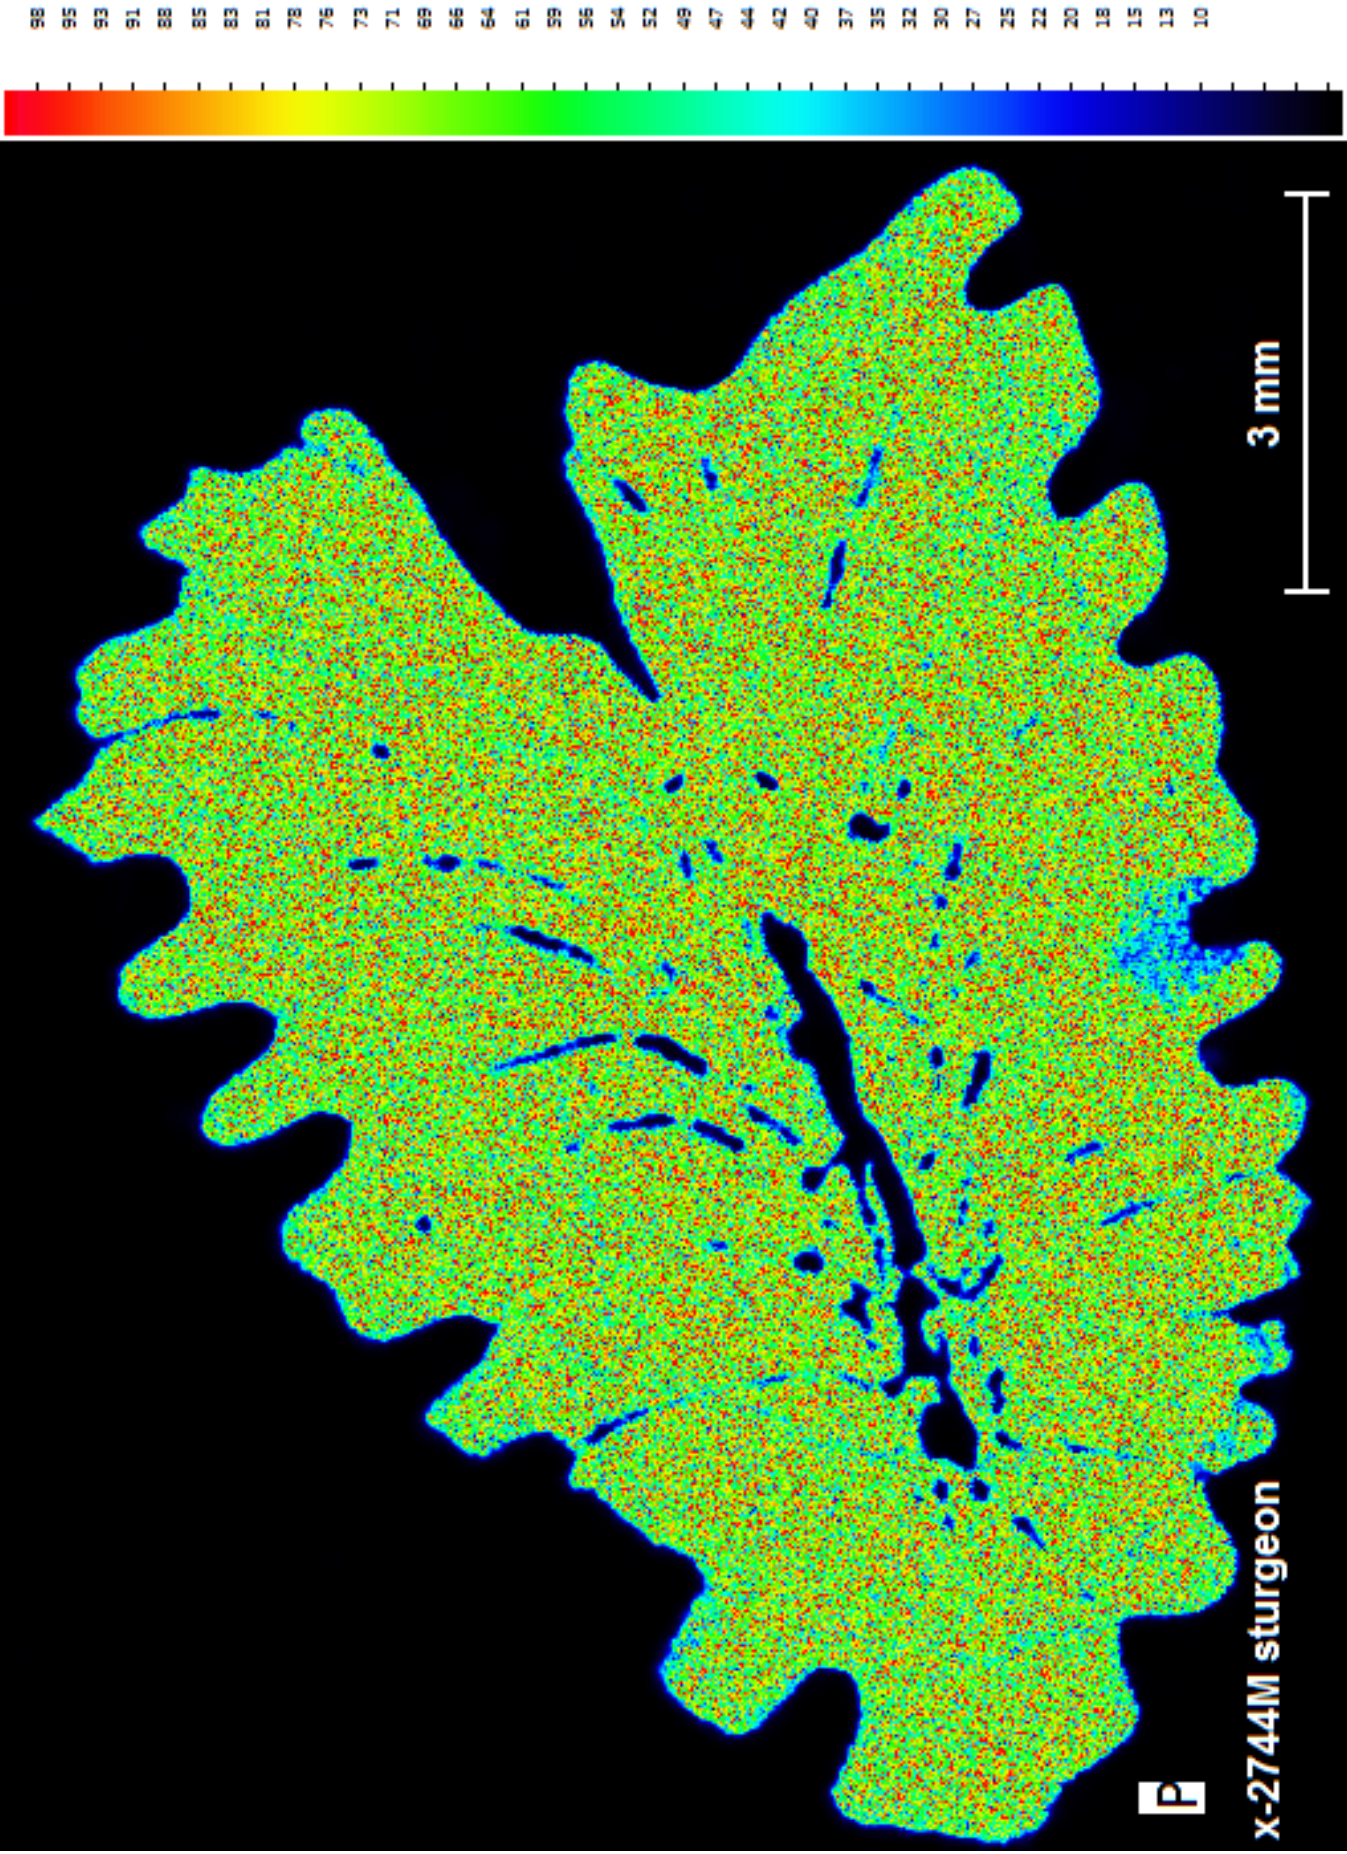

3. Propagation-based phase contrast synchrotron radiation micro computed tomography

3.1 Thick slab (virtual thin sections) of X-2724, MDX-3, X-2743M and X-2744M

3.2

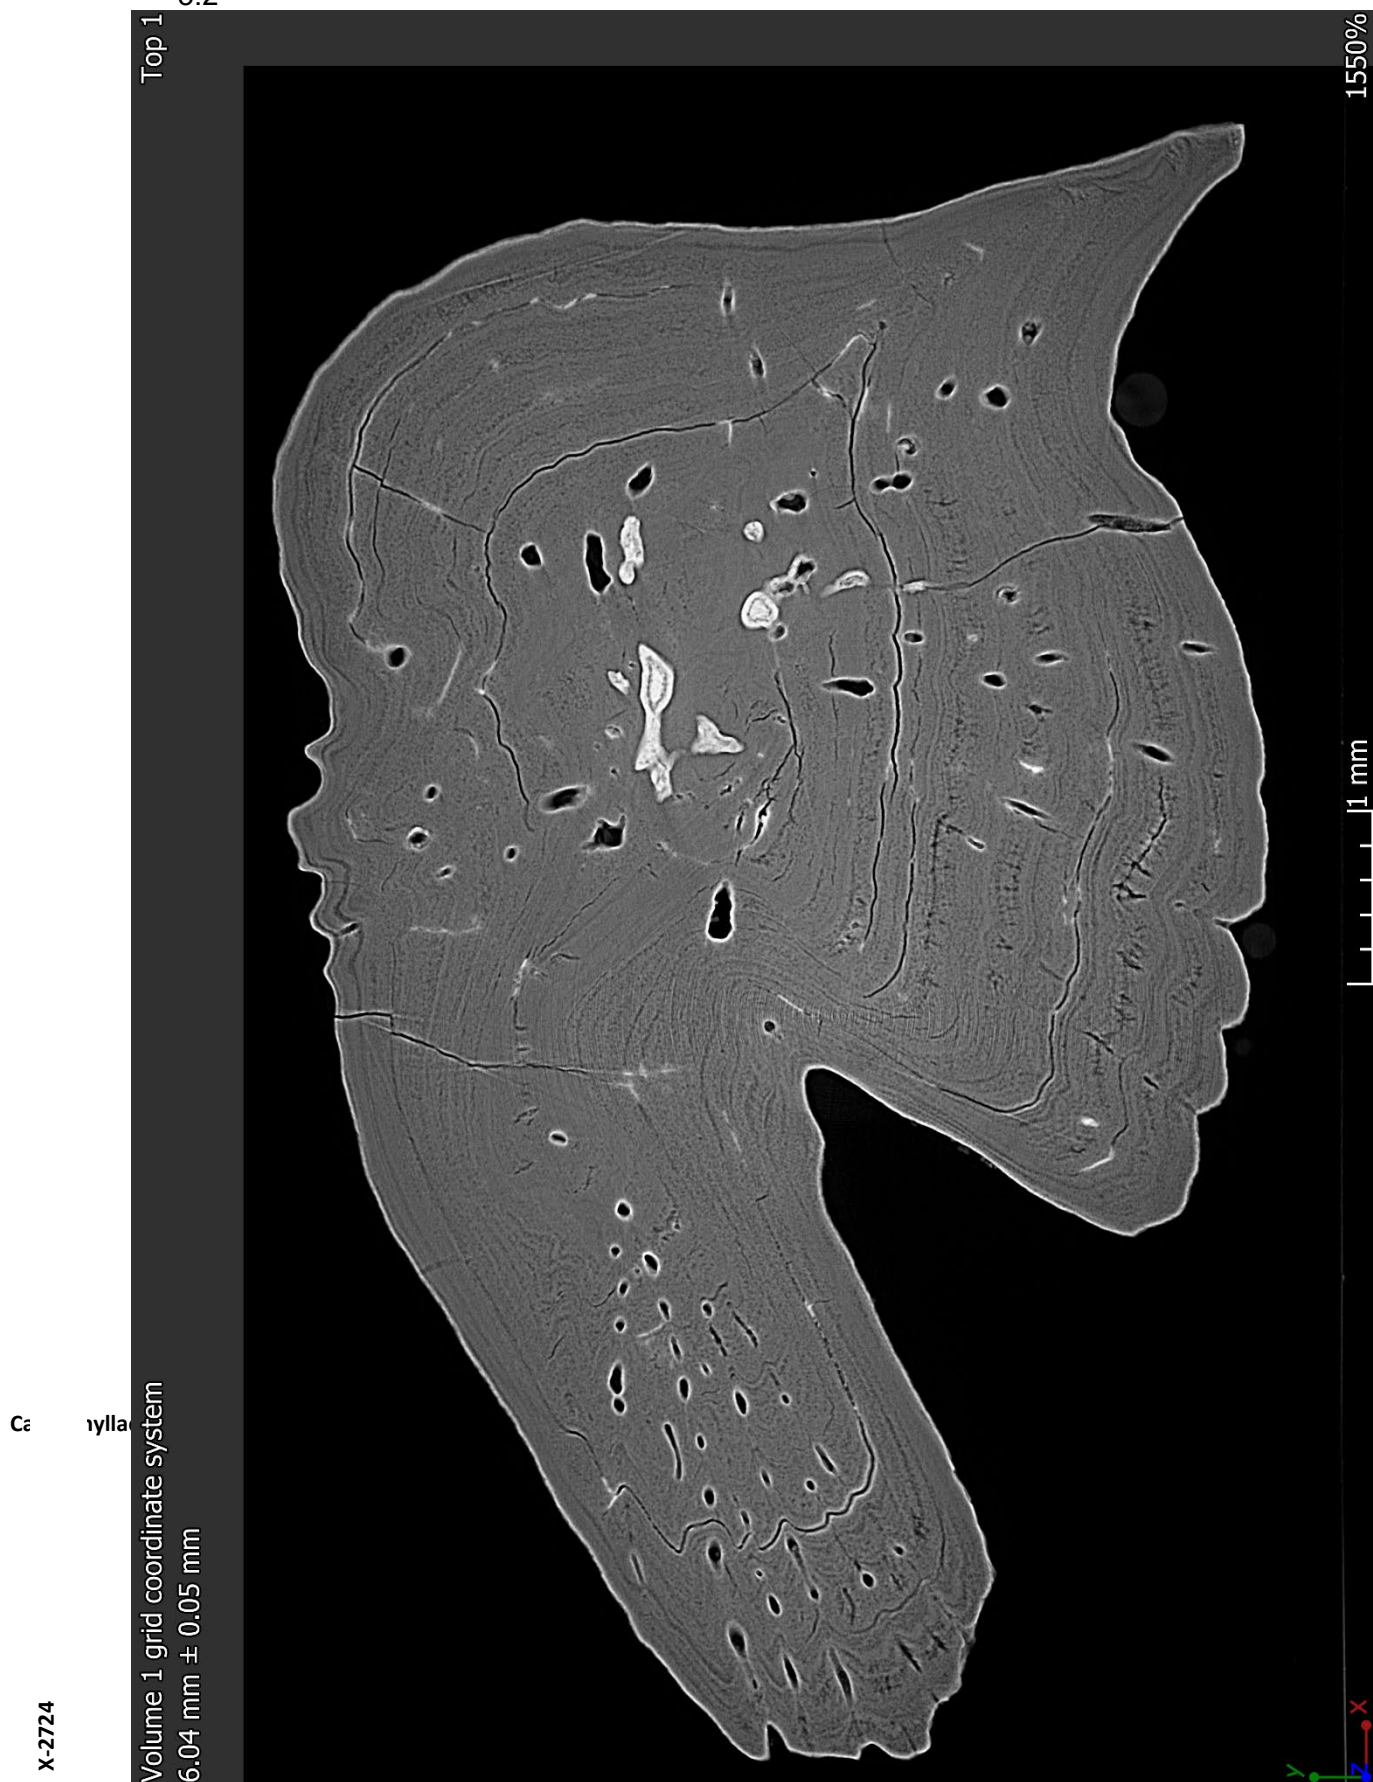

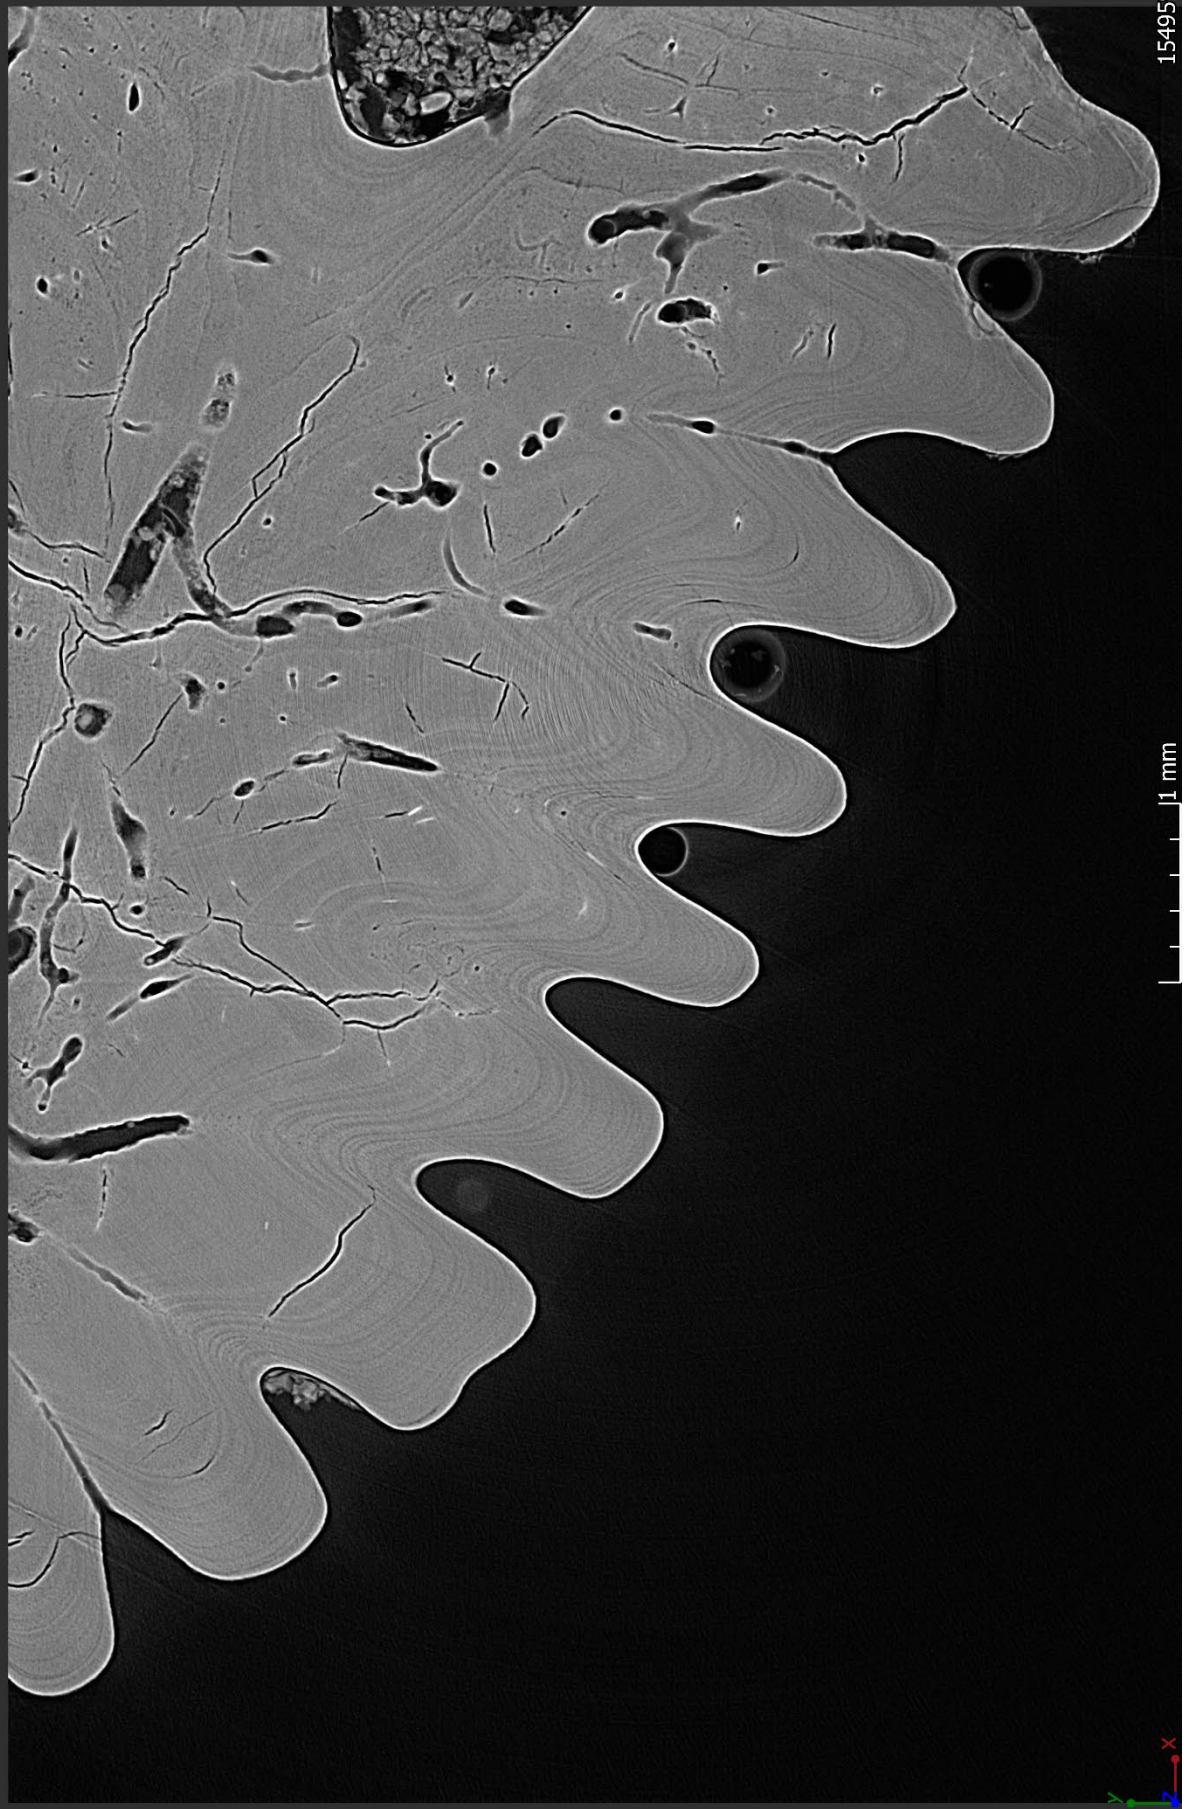

Volume 1 grid coordinate system  
20.30 mm  $\pm$  0.05 mm

Top 1

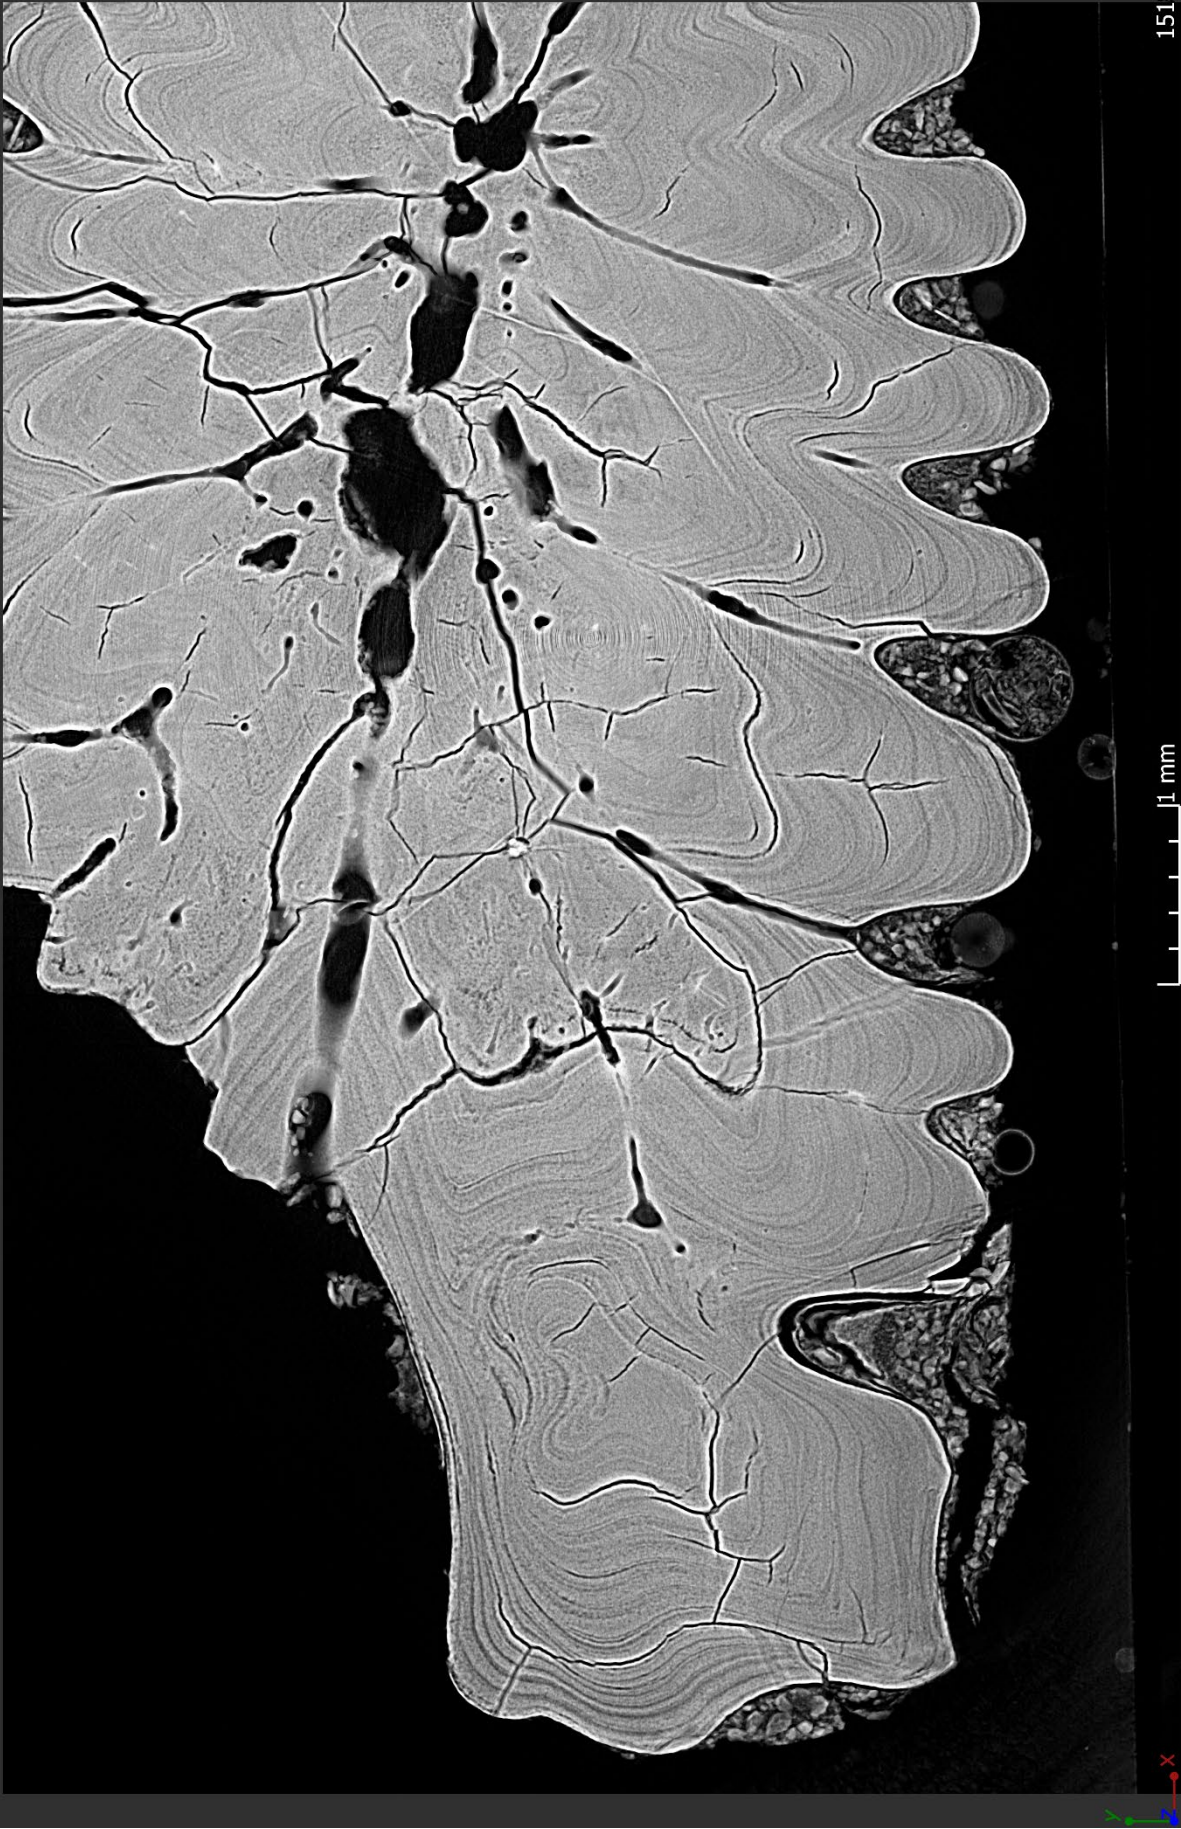

1 mm

1518%

Volume 1 grid coordinate system  
20.88 mm  $\pm$  0.05 mm

Top 1

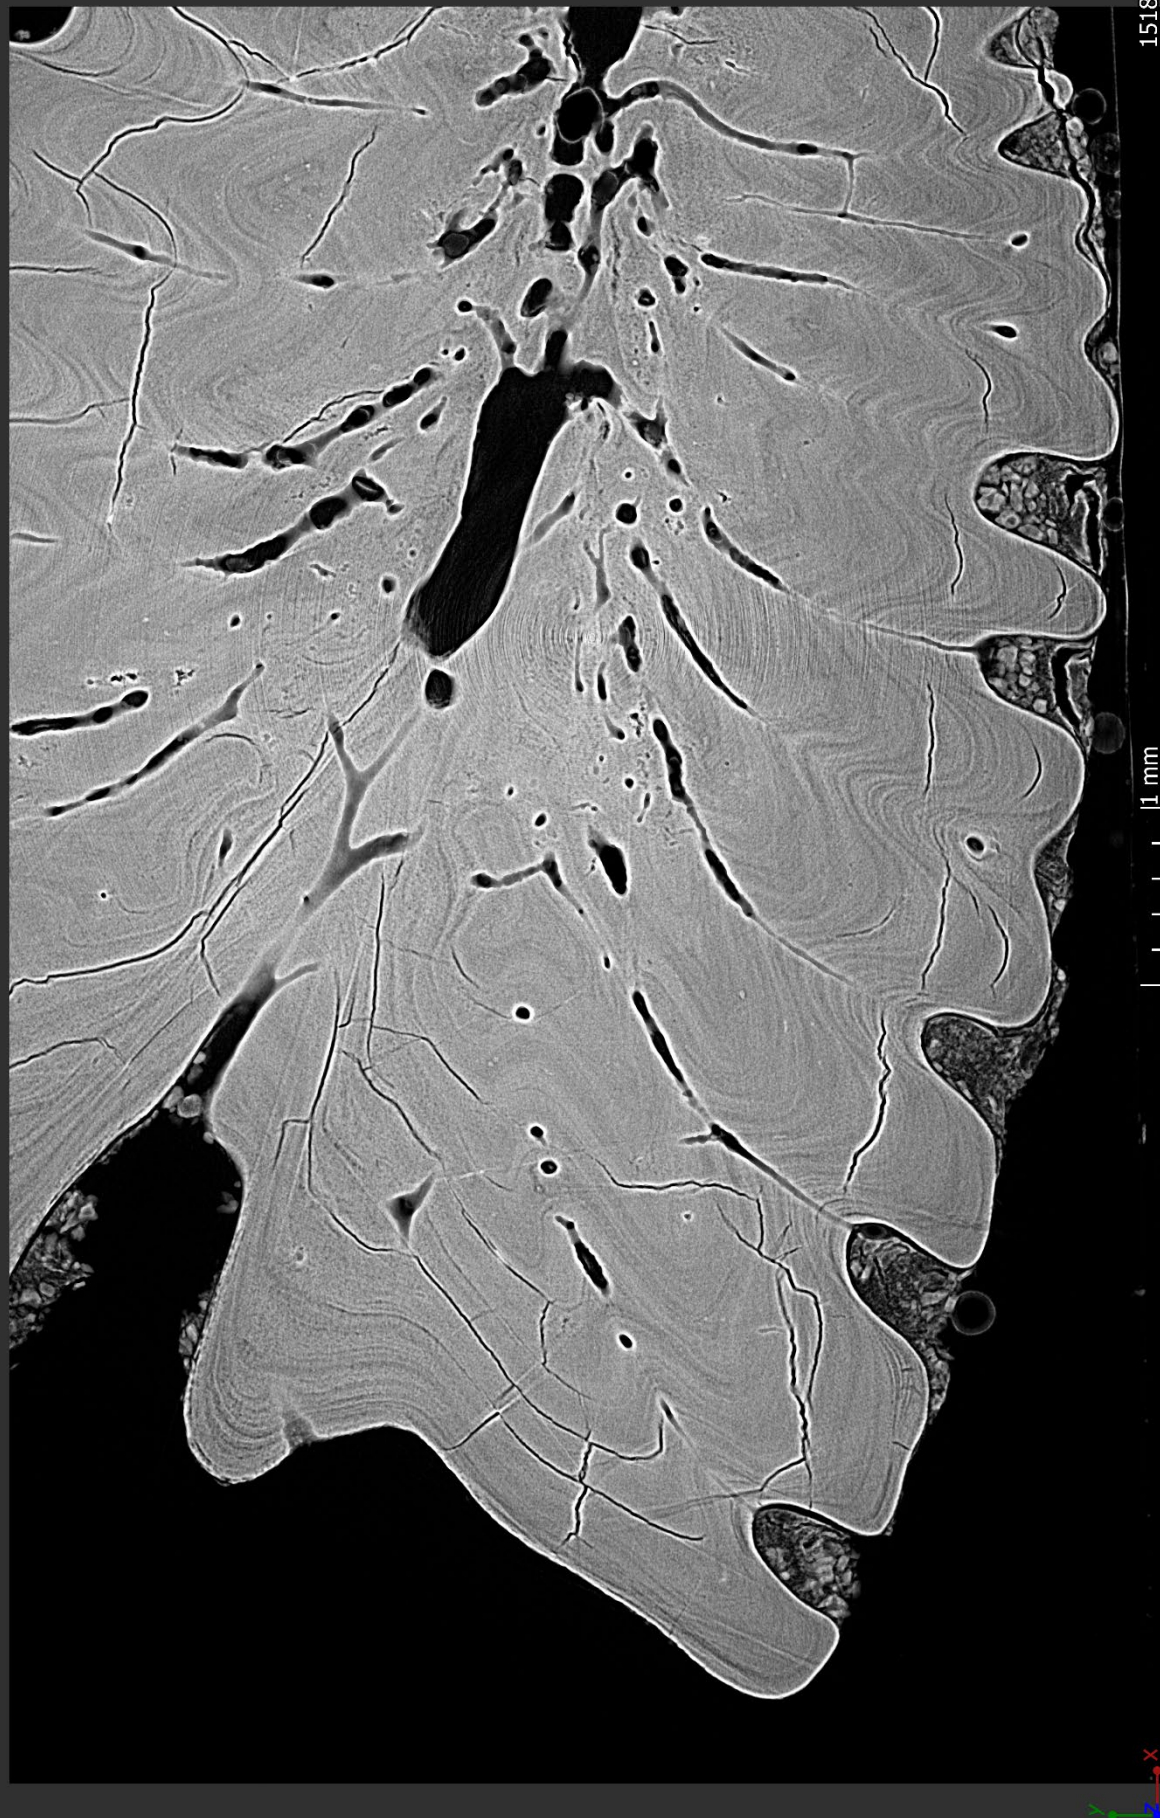

4.1 Thick slab (virtual thin sections) of FAU.DGS.ND.161.4559.T with the impact spherules in the gill rakers (tektites indicated on next page)

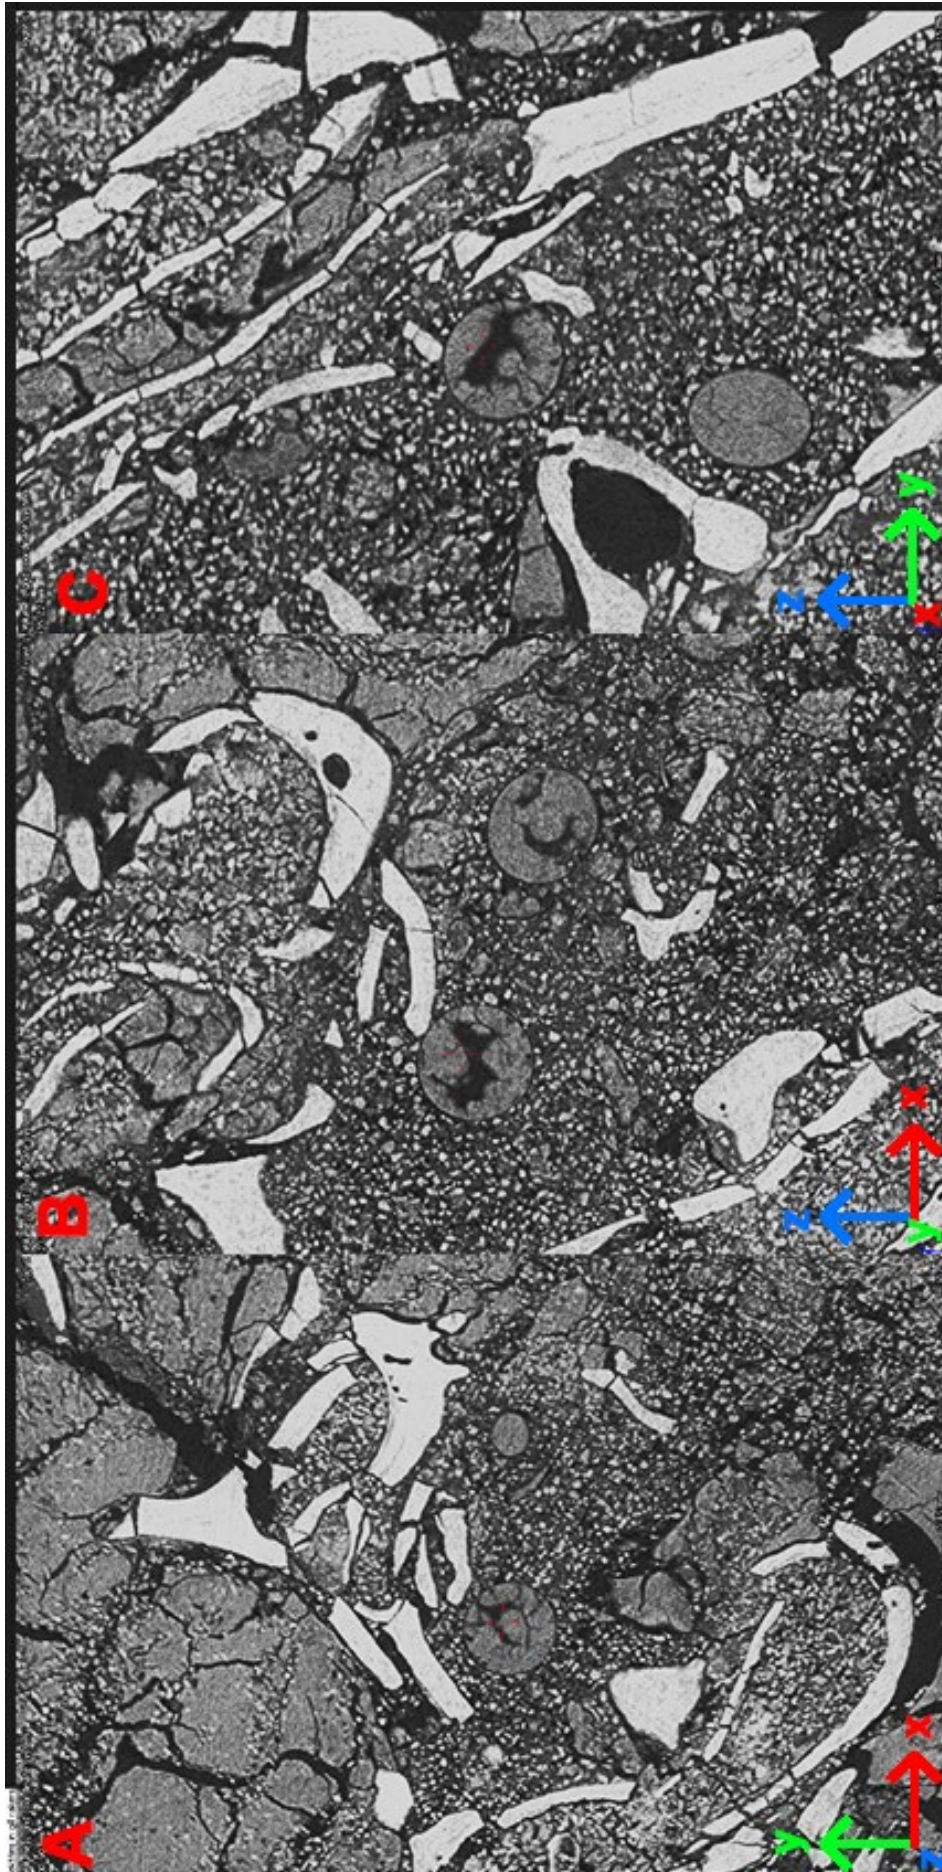

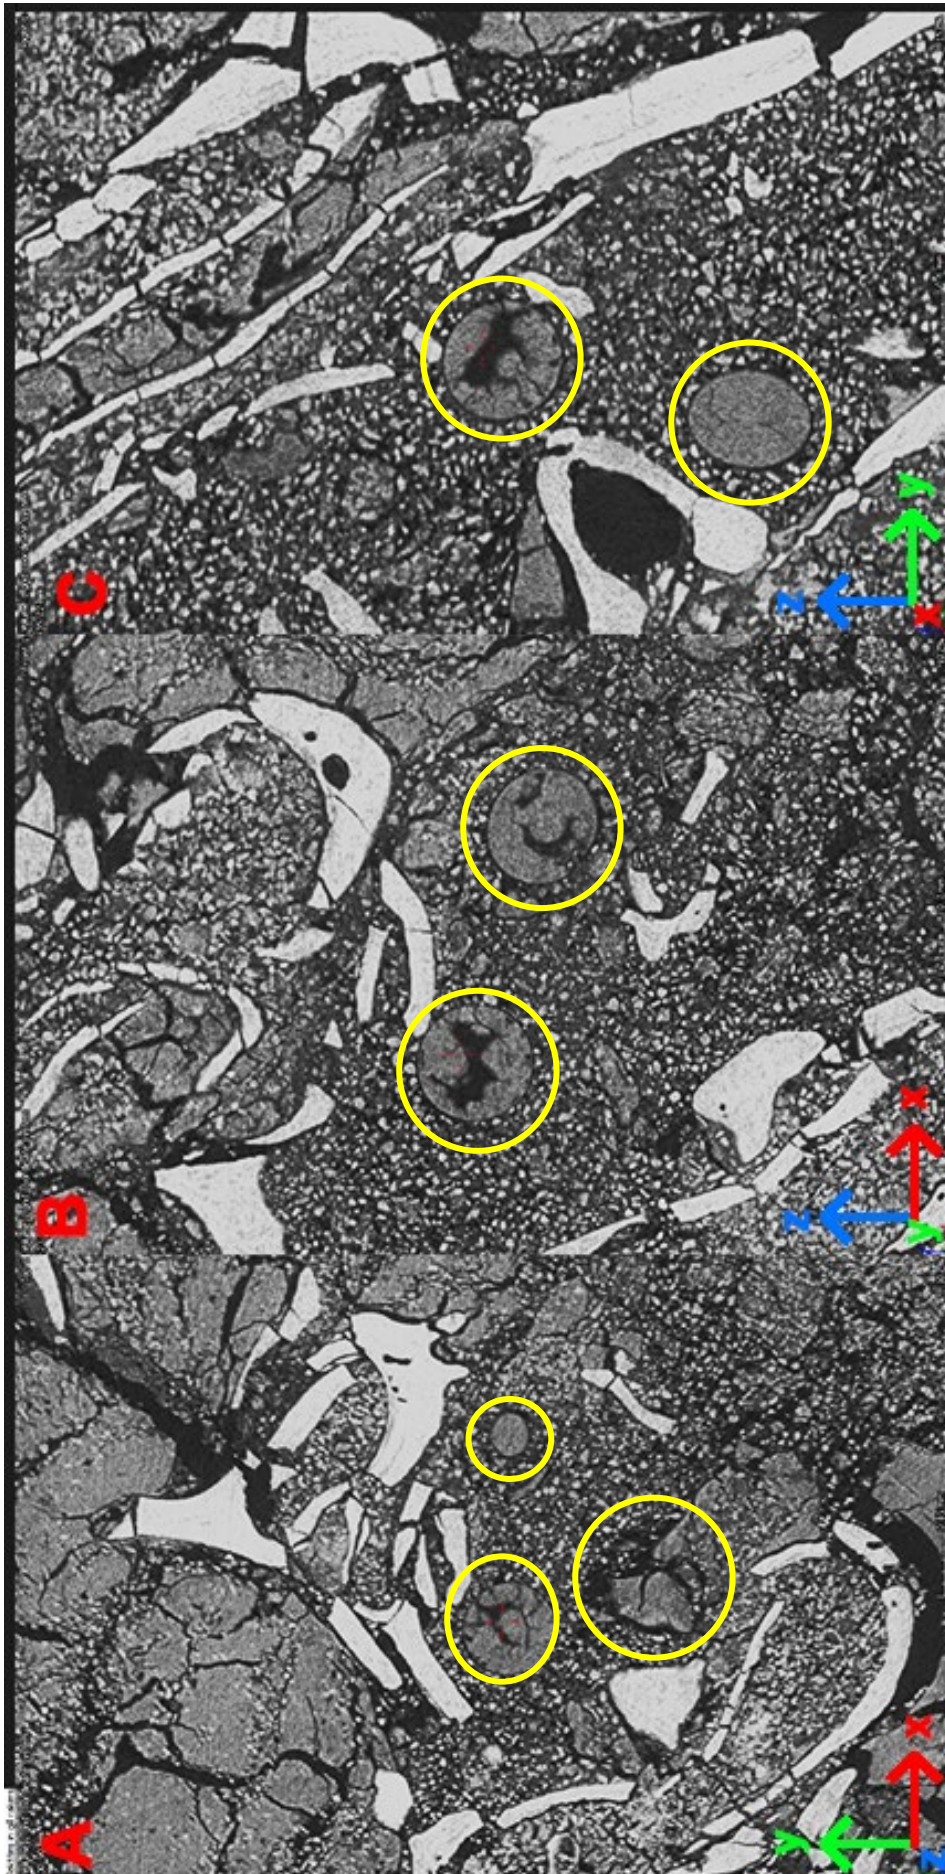

3.1 Thick slabs (virtual thin sections) of the membranous non-mineralized sidewalls of the cranial cavity of FAU.DGS.ND.161.4559.T with locations indicated on the 3D model of the specimen.

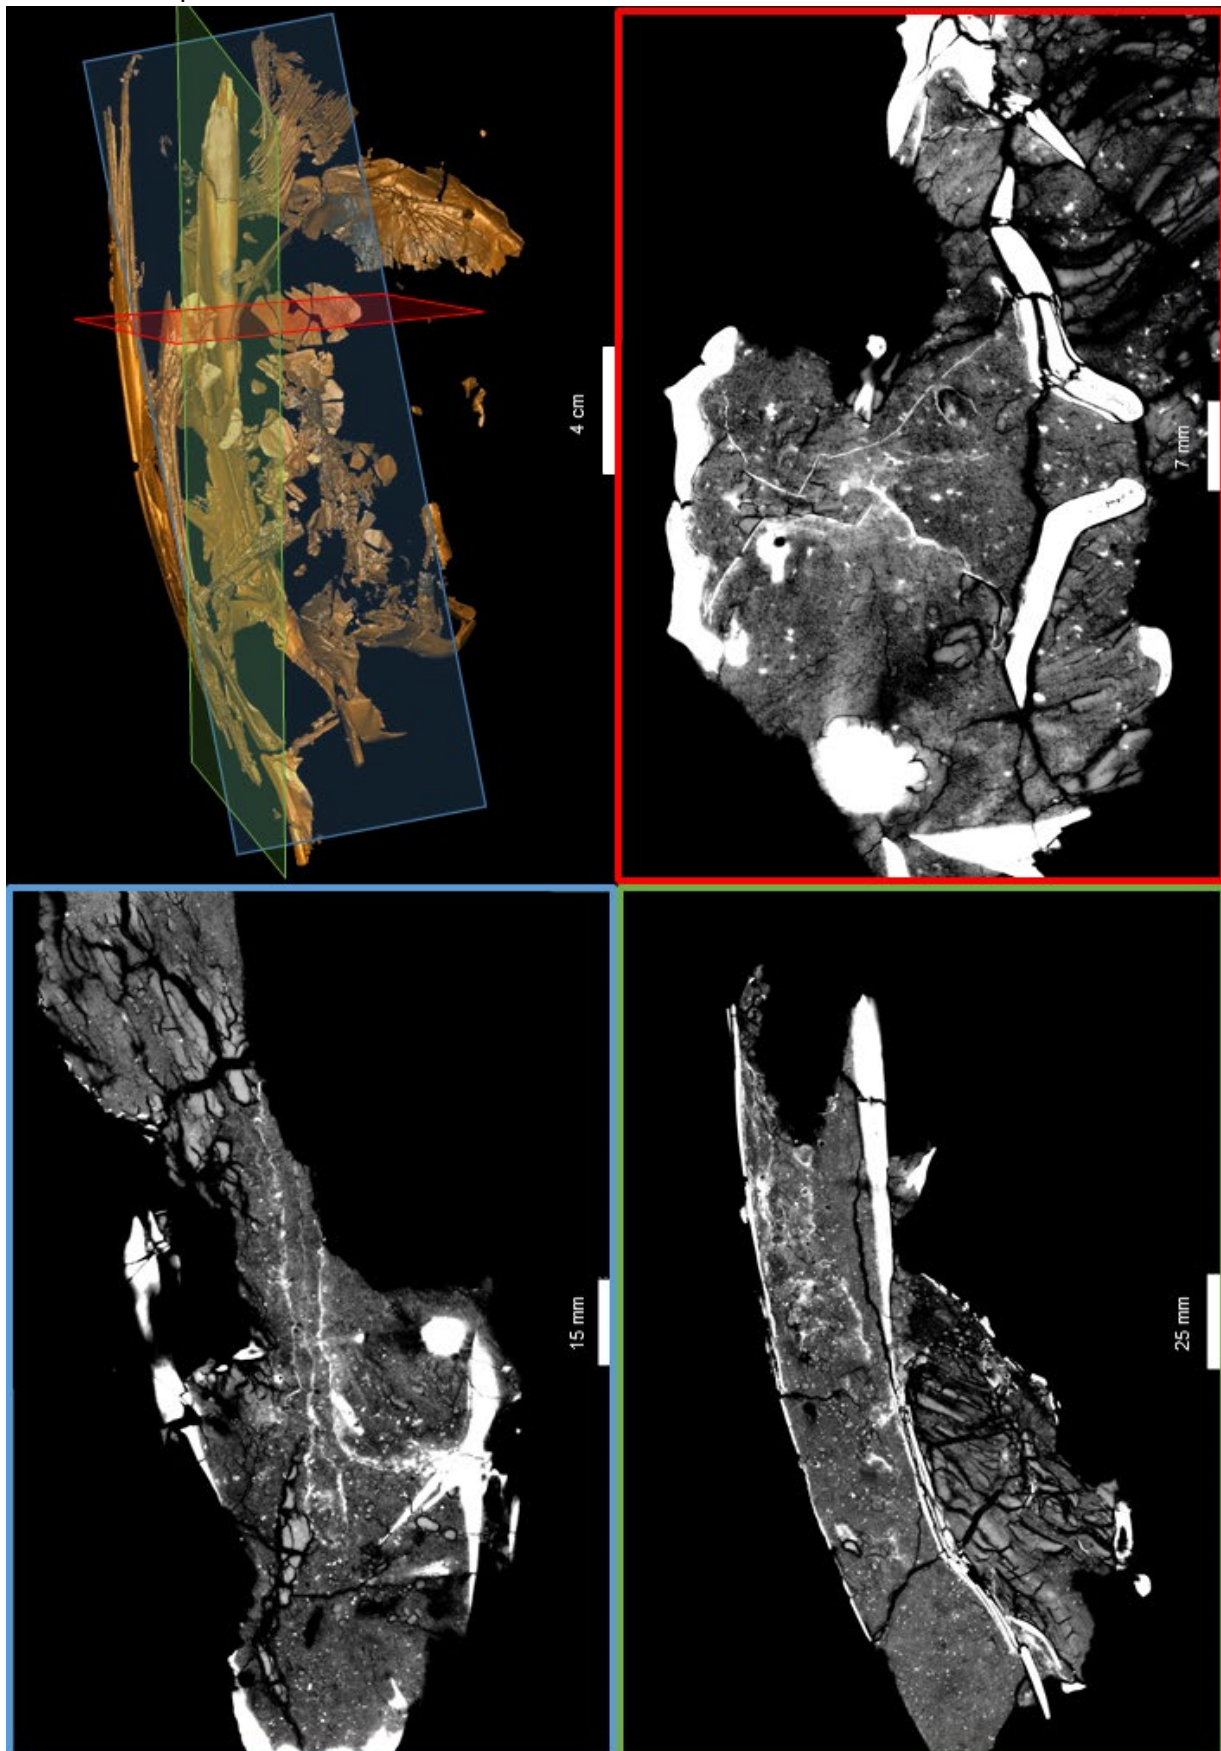

Supplement: Supplementary file 1 [file d018647d8baa7037ccb25ded.pdf]
